# Supplementary material for: Hedgehog Signaling Inhibition by Smoothened Antagonist BMS-833923 Reduces Osteoblast Differentiation and Ectopic Bone Formation of Human Skeletal (Mesenchymal) Stem Cells
Source: Stem Cells Int. 2019 Nov 21;2019:3435901. doi: 10.1155/2019/3435901 (PMC6907053; doi:10.1155/2019/3435901)
Supplement: Supplementary Materials — Supplementary Table 1: upregulated genes in hBMSCs treated with BMS-833923 compared to DMSO on day 10 of osteoblastic differentiation. Supplementary Table 2: downregulated genes in hBMSCs treated with BMS-833923 compared to DMSO on day 10 of osteoblastic differentiation. [file 3435901.f1.xlsx]

## Sheet: Supplementary table 1 up genes 
Supplementary table 1. Upregulated genes in hBMSCs treated with BMS‐833923 compared to DMSO on day 10 of osteoblastic differentiation.
ProbeName	FC ([BMS‐833923] vs [DMSO])	Log FC ([BMS‐833923] vs [DMSO])	FC (abs) ([BMS‐833923] vs [DMSO])	Regulation ([BMS‐833923] vs [DMSO])	BMS‐833923_OS_D10_2_US10493856_253949447891_S01_GE1_1100_Jul11_2_4.txt:gProcessedSignal(normalized)	BMS‐833923_OS_D10_1_US10493856_253949447891_S01_GE1_1100_Jul11_2_3.txt:gProcessedSignal(normalized)	DMSO_OS_D10_1_2_US10493856_253949447891_S01_GE1_1100_Jul11_1_1.txt:gProcessedSignal(normalized)	DMSO_OS_D10_1_US10493856_253949447891_S01_GE1_1100_Jul11_1_1.txt:gProcessedSignal(normalized)	GeneSymbol	GeneName	ControlType	Description	EntrezGeneID	Go	Chromosome End Index_Avadis_	Chromosome Number_Avadis_	Chromosome Start Index_Avadis_	Chromosome Strand_Avadis_	Cytoband	GenbankAccession	GenomicCoordinates	RefSeqAccession	UniGeneID
A_21_P0000509	2.62375	1.39163	2.62375	up	0.626797	0.223413	-0.966526	-0.966526	SNAR-G2	small ILF3/NF90-associated RNA G2	FALSE	Homo sapiens small ILF3/NF90-associated RNA G2 (SNAR-G2), small nuclear RNA [NR_024244]	100170228		49534993	chr19	49534934	-	hs|19q13.33	NR_024244	chr19:49534993-49534934	NR_024244	Hs.717308
A_33_P3402773	2.19168	1.13204	2.19168	up	0.589901	0.217618	-0.72828	-0.72828			FALSE				24285060	chr22	24285001	+	hs|22q11.23		chr22:024285001-024285060
A_33_P3500167	2.69421	1.42986	2.69421	up	0.741729	1.01296	-0.552516	-0.552516	ACAN	aggrecan	FALSE	Homo sapiens aggrecan (ACAN), transcript variant 1, mRNA [NM_001135]	176	GO:0005515|GO:0005796|GO:0005975|GO:0005578|GO:0005576|GO:0044281|GO:0046872|GO:0042339|GO:0031012|GO:0001501|GO:0005540|GO:0018146|GO:0022617|GO:0030198|GO:0042340|GO:0006508|GO:0009405|GO:0030246|GO:0007155|GO:0030203|GO:0043202|GO:0005201	89347039	chr15	89346980	+	hs|15q26.1	NM_001135	chr15:89346980-89347039	NM_001135	Hs.2159
A_21_P0000144	2.1071	1.07526	2.1071	up	0.165103	0.0789373	-0.953237	-0.953237	LOC100505478	uncharacterized LOC100505478	FALSE	Homo sapiens uncharacterized LOC100505478 (LOC100505478), mRNA [NM_001199233]	100505478		117428781	chr9	117428722	-	hs|9q32	NM_001199233	chr9:117428781-117428722	NM_001199233	Hs.200101
A_23_P107587	2.21394	1.14662	2.21394	up	1.04255	1.26375	0.00653195	0.00653195	NPC1	Niemann-Pick disease, type C1	FALSE	Homo sapiens Niemann-Pick disease, type C1 (NPC1), mRNA [NM_000271]	4864	GO:0031579|GO:0005515|GO:0015248|GO:0048471|GO:0005783|GO:0016242|GO:0005635|GO:0030301|GO:0005765|GO:0005764|GO:0015485|GO:0060548|GO:0007628|GO:0004872|GO:0008206|GO:0070062|GO:0008203|GO:0042632|GO:0033344|GO:0005794|GO:0090150|GO:0042493|GO:0006914|GO:0005576|GO:0006897|GO:0071404|GO:0007165|GO:0016020|GO:0005887|GO:0071383|GO:0031902|GO:0008158|GO:0045121|GO:0006486|GO:0007041|GO:0016021|GO:…	21113347	chr18	21112218	-	hs|18q11.2	NM_000271	chr18:21113347-21112218	NM_000271	Hs.715623
A_33_P3229012	2.59313	1.37469	2.59313	up	0.82354	0.7347	-0.595572	-0.595572			FALSE				78949	chrUn_gl000225	78890	+			chrUn_gl000225:000078890-000078949
A_33_P3240497	2.29569	1.19893	2.29569	up	0.678593	0.57565	-0.571806	-0.571806			FALSE	Homo sapiens cDNA FLJ38411 fis, clone FEBRA2009352. [AK095730]			45349927	chr1	45349868	-	hs|1p34.1	AK095730	chr1:45349927-45349868
A_33_P3344991	2.41984	1.27491	2.41984	up	-0.0194807	0.196702	-1.1863	-1.1863	TBC1D3L	TBC1 domain family, member 3L	FALSE	Homo sapiens cDNA FLJ16441 fis, clone BRAMY3003205, highly similar to TBC1 domain family member 3. [AK122833]	101060376		36286863	chr17	36286804	+	hs|17q12	AK122833	chr17:36286804-36286863
A_33_P3367301	2.52705	1.33745	2.52705	up	0.917773	0.833517	-0.461809	-0.461809	GJD3	gap junction protein, delta 3, 31.9kDa	FALSE	Homo sapiens gap junction protein, delta 3, 31.9kDa (GJD3), mRNA [NM_152219]	125111	GO:0005515|GO:0005243|GO:0034220|GO:0007154|GO:0009986|GO:0005887|GO:0005922|GO:0016264|GO:0005216|GO:0009749	38516987	chr17	38516928	-	hs|17q21.2	NM_152219	chr17:38516987-38516928	NM_152219	Hs.444663
A_21_P0003648	2.00667	1.0048	2.00667	up	0.0149901	0.32035	-0.837135	-0.837135	lnc-SPATA5-2	lnc-SPATA5-2:1	FALSE	LNCipedia lincRNA (lnc-SPATA5-2), lincRNA [lnc-SPATA5-2:1]			124249525	chr4	124249466	+	hs|4q28.1		chr4:124249466-124249525
A_33_P3627001	2.54694	1.34876	2.54694	up	0.258453	-0.00338054	-1.22123	-1.22123	PEBP4	phosphatidylethanolamine-binding protein 4	FALSE	Homo sapiens phosphatidylethanolamine-binding protein 4 (PEBP4), mRNA [NM_144962]	157310	GO:0005515|GO:0005764|GO:0070062	22570843	chr8	22570784	-	hs|8p21.3	NM_144962	chr8:22570843-22570784	NM_144962	Hs.491242
A_21_P0000264	2.44294	1.28862	2.44294	up	0.742595	0.417974	-0.708331	-0.708331	SNORD74	small nucleolar RNA, C/D box 74	FALSE	Homo sapiens small nucleolar RNA, C/D box 74 (SNORD74), small nucleolar RNA [NR_002579]	619498		173836871	chr1	173836812	-	hs|1q25.1	NR_002579	chr1:173836871-173836812	NR_002579	Hs.628272
A_23_P115261	2.68539	1.42513	2.68539	up	0.993258	0.918155	-0.469424	-0.469424	AGT	angiotensinogen (serpin peptidase inhibitor, clade A, member 8)	FALSE	Homo sapiens angiotensinogen (serpin peptidase inhibitor, clade A, member 8) (AGT), mRNA [NM_000029]	183	GO:0005515|GO:0030308|GO:0001658|GO:0009651|GO:0009409|GO:0006883|GO:0001819|GO:0005615|GO:0001558|GO:0019229|GO:0002019|GO:0002018|GO:0030198|GO:0002016|GO:0014061|GO:0007565|GO:0010744|GO:0007568|GO:0002034|GO:0014068|GO:0001543|GO:0030432|GO:0010595|GO:0032270|GO:0005179|GO:0001999|GO:0007186|GO:0001998|GO:0008083|GO:0008285|GO:0002003|GO:0007263|GO:0004867|GO:0007199|GO:0007267|GO:0010873|GO:…	230838590	chr1	230838531	-	hs|1q42.2	NM_000029	chr1:230838590-230838531	NM_000029	Hs.19383
A_21_P0002930	2.03136	1.02245	2.03136	up	0.112882	-0.112882	-1.02245	-1.02245	lnc-TSEN2-1	lnc-TSEN2-1:2	FALSE	LNCipedia lincRNA (lnc-TSEN2-1), lincRNA [lnc-TSEN2-1:2]			12518009	chr3	12517950	+	hs|3p25.2		chr3:12517950-12518009
A_23_P420942	3.41219	1.7707	3.41219	up	1.09425	1.62442	-0.411365	-0.411365	MT1E	metallothionein 1E	FALSE	PREDICTED: Homo sapiens metallothionein 1E (MT1E), transcript variant X1, mRNA [XM_005255956]	4493	GO:0071294|GO:0048471|GO:0005737|GO:0008270|GO:0005634|GO:0071276|GO:0045926	56660673	chr16	56660614	+	hs|16q12.2	XM_005255956	chr16:56660614-56660673	XM_005255956
A_21_P0014502	2.10478	1.07367	2.10478	up	-0.259408	0.0880442	-1.15935	-1.15935			FALSE	Homo sapiens antigen MMSA-4 mRNA sequence. [AY952884]			45911491	chr13	45911432	+	hs|13q14.13	AY952884	chr13:45911432-45911491		Hs.374596
A_24_P203765	3.24224	1.69699	3.24224	up	0.536208	0.156405	-1.35068	-1.35068	SLC1A7	solute carrier family 1 (glutamate transporter), member 7	FALSE	Homo sapiens solute carrier family 1 (glutamate transporter), member 7 (SLC1A7), transcript variant 2, mRNA [NM_001287596]	6512	GO:0005886|GO:0005313|GO:0006835|GO:0017153|GO:0016021|GO:0055085|GO:0006811	53580455	chr1	53574273	-	hs|1p32.3	NM_001287596	chr1:53580455-53574273	NM_001287596	Hs.104637
ERCC-00113_271	2.02391	1.01714	2.02391	up	1.05442	0.703219	-0.138321	-0.138321			pos
A_33_P3307147	2.3688	1.24416	2.3688	up	0.268396	0.114494	-1.05271	-1.05271	GRIK2	glutamate receptor, ionotropic, kainate 2	FALSE	Homo sapiens glutamate receptor, ionotropic, kainate 2 (GRIK2), transcript variant 3, mRNA [NM_001166247]	2898	GO:0030054|GO:0005886|GO:0005234|GO:0007268|GO:0032839|GO:0051402|GO:0006886|GO:0019228|GO:0030425|GO:0042803|GO:0046328|GO:0043524|GO:0043525|GO:0034220|GO:0045211|GO:0043195|GO:0048169|GO:0015277|GO:0006810|GO:0043204|GO:0001662|GO:0031625|GO:0031624|GO:0051967|GO:0060079|GO:0006874|GO:0035249|GO:0050804|GO:0014069|GO:0007215|GO:0030165|GO:0042734|GO:0035235|GO:0060080|GO:0032983|GO:0005887|GO:…	102513781	chr6	102513722	+	hs|6q16.3	NM_001166247	chr6:102513722-102513781	NM_001166247	Hs.98262
A_21_P0001227	4.29738	2.10346	4.29738	up	1.94857	1.96282	-0.14776	-0.14776			FALSE	601566084F1 NIH_MGC_21 Homo sapiens cDNA clone IMAGE:3840837 5', mRNA sequence [BE735115]			222215119	chr1	222215060	-	hs|1q41		chr1:222215119-222215060		Hs.444944
A_21_P0007219	3.20153	1.67876	3.20153	up	1.48572	1.28522	-0.293294	-0.293294	lnc-AP000769.1-1	lnc-AP000769.1-1:1	FALSE	LNCipedia lincRNA (lnc-AP000769.1-1), lincRNA [lnc-AP000769.1-1:1]			65220779	chr11	65220720	+	hs|11q13.1		chr11:65220720-65220779
A_23_P6561	2.24272	1.16525	2.24272	up	0.0415328	-0.229764	-1.25936	-1.25936	EBLN2	endogenous Bornavirus-like nucleoprotein 2	FALSE	Homo sapiens endogenous Bornavirus-like nucleoprotein 2 (EBLN2), mRNA [NM_018029]	55096		73112458	chr3	73112399	+	hs|3p13	NM_018029	chr3:73112399-73112458	NM_018029	Hs.658858
A_23_P307310	4.64037	2.21424	4.64037	up	1.23027	1.06607	-1.06607	-1.06607	ACAN	aggrecan	FALSE	Homo sapiens aggrecan (ACAN), transcript variant 2, mRNA [NM_013227]	176	GO:0005515|GO:0005796|GO:0005975|GO:0005578|GO:0005576|GO:0044281|GO:0046872|GO:0042339|GO:0031012|GO:0001501|GO:0005540|GO:0018146|GO:0022617|GO:0030198|GO:0042340|GO:0006508|GO:0009405|GO:0030246|GO:0007155|GO:0030203|GO:0043202|GO:0005201	89417830	chr15	89417771	+	hs|15q26.1	NM_013227	chr15:89417771-89417830	NM_013227	Hs.2159
A_23_P347632	2.01989	1.01428	2.01989	up	0.738273	0.487453	-0.401416	-0.401416	MTSS1	metastasis suppressor 1	FALSE	Homo sapiens metastasis suppressor 1 (MTSS1), transcript variant 2, mRNA [NM_014751]	9788	GO:0072160|GO:0007009|GO:0005515|GO:0030036|GO:0030035|GO:0034334|GO:0050680|GO:0006928|GO:0030139|GO:0030282|GO:0015629|GO:0042802|GO:0061333|GO:0005737|GO:0051015|GO:0010960|GO:0005912|GO:0032233|GO:2001013|GO:0030041|GO:0007155|GO:0072102|GO:0005102|GO:0001726|GO:0001701|GO:0071498|GO:0003785|GO:0007169	125563314	chr8	125563255	-	hs|8q24.13	NM_014751	chr8:125563314-125563255	NM_014751	Hs.336994
A_21_P0011037	2.47771	1.30901	2.47771	up	0.450061	0.0368207	-1.06557	-1.06557	XLOC_l2_002886		FALSE	BROAD Institute lincRNA (XLOC_l2_002886), lincRNA [TCONS_l2_00005503]			9806442	chr12	9806383	+	hs|12p13.31		chr12:9806383-9806442
A_21_P0012456	2.19843	1.13647	2.19843	up	1.21732	1.0967	0.0205312	0.0205312	LOC101927056	uncharacterized LOC101927056	FALSE	Homo sapiens uncharacterized LOC101927056 (LOC101927056), transcript variant 1, long non-coding RNA [NR_125395]	101927056		125590982	chr3	125590923	-	hs|3q21.2	NR_125395	chr3:125590982-125590923	NR_125395
A_33_P3332414	2.41874	1.27426	2.41874	up	-0.0827827	0.199358	-1.21597	-1.21597	ABCB1	ATP-binding cassette, sub-family B (MDR/TAP), member 1	FALSE	Homo sapiens ATP-binding cassette, sub-family B (MDR/TAP), member 1 (ABCB1), mRNA [NM_000927]	5243	GO:0005515|GO:0005215|GO:0005886|GO:0009986|GO:0042493|GO:0072089|GO:0042626|GO:0042908|GO:0044281|GO:0055085|GO:0005524|GO:0008559|GO:0016020|GO:0000086|GO:0006855|GO:0006810|GO:0016021|GO:0070062	87229494	chr7	87229435	-	hs|7q21.12	NM_000927	chr7:87229494-87229435	NM_000927	Hs.489033
A_23_P118065	2.1248	1.08732	2.1248	up	0.855033	0.721485	-0.299065	-0.299065	HSD17B2	hydroxysteroid (17-beta) dehydrogenase 2	FALSE	Homo sapiens hydroxysteroid (17-beta) dehydrogenase 2 (HSD17B2), mRNA [NM_002153]	3294	GO:0006694|GO:0004303|GO:0047035|GO:0047006|GO:0005789|GO:0032526|GO:0016021|GO:0001890|GO:0001701|GO:0055114	82131956	chr16	82131897	+	hs|16q23.3	NM_002153	chr16:82131897-82131956	NM_002153	Hs.162795
A_24_P330633	2.4104	1.26927	2.4104	up	0.139779	0.00102568	-1.19887	-1.19887	TAT	tyrosine aminotransferase	FALSE	Homo sapiens tyrosine aminotransferase (TAT), mRNA [NM_000353]	6898	GO:0006559|GO:0006536|GO:0009058|GO:0004838|GO:0051384|GO:0044281|GO:0005575|GO:0005829|GO:0005739|GO:0034641|GO:0006103|GO:0030170|GO:0006572|GO:0046689|GO:0006979|GO:0016597|GO:0080130	71600789	chr16	71600754	-	hs|16q22.2	NM_000353	chr16:71600789-71600754	NM_000353	Hs.161640
A_32_P221	2.27201	1.18397	2.27201	up	-0.257424	-0.109022	-1.36719	-1.36719	C16orf78	chromosome 16 open reading frame 78	FALSE	Homo sapiens chromosome 16 open reading frame 78 (C16orf78), mRNA [NM_144602]	123970	GO:0005634	49433174	chr16	49433115	+	hs|16q12.1	NM_144602	chr16:49433115-49433174	NM_144602	Hs.125875
A_33_P3423874	2.72581	1.44669	2.72581	up	1.36298	1.14503	-0.192686	-0.192686	MYZAP	myocardial zonula adherens protein	FALSE	Homo sapiens myocardial zonula adherens protein (MYZAP), transcript variant 1, mRNA [NM_001018100]	100820829	GO:0035556|GO:0005515|GO:0030018|GO:0030054|GO:0030864|GO:0031674|GO:0031234	57977531	chr15	57977472	+	hs|15q21.3	NM_001018100	chr15:57977472-57977531	NM_001018100	Hs.437256
A_21_P0006563	3.49239	1.80421	3.49239	up	0.0446951	0.188831	-1.68745	-1.68745	ZC3H12B	zinc finger CCCH-type containing 12B	FALSE	zinc finger CCCH-type containing 12B [Source:HGNC Symbol;Acc:HGNC:17407] [ENST00000617377]	340554	GO:0004519|GO:0090305|GO:0046872	64588865	chrX	64588806	+	hs|Xq11.2		chrX:64588806-64588865		Hs.533278
A_21_P0002621	9.83169	3.29744	9.83169	up	0.438756	0.463673	-2.84622	-2.84622	LINC01117	long intergenic non-protein coding RNA 1117	FALSE	PREDICTED: Homo sapiens uncharacterized LOC102724224 (LOC102724224), ncRNA [XR_427195]	102724224		177520704	chr2	177520645	+	hs|2q31.1		chr2:177520645-177520704	XR_427195
A_33_P3619171	2.37589	1.24847	2.37589	up	1.10452	0.884757	-0.253829	-0.253829	PMAIP1	phorbol-12-myristate-13-acetate-induced protein 1	FALSE	Homo sapiens phorbol-12-myristate-13-acetate-induced protein 1 (PMAIP1), mRNA [NM_021127]	5366	GO:0005515|GO:0043331|GO:0010165|GO:0048147|GO:0005741|GO:0005634|GO:0001836|GO:0010907|GO:0005829|GO:0005739|GO:0051607|GO:1900740|GO:0043525|GO:0090200|GO:0042149|GO:0032461|GO:0043029|GO:0009411|GO:0046902|GO:0043065|GO:0006919|GO:0072593|GO:0071456|GO:0006915|GO:2001244|GO:0097193|GO:0043280|GO:0042771|GO:0010917|GO:0072332|GO:0043517|GO:0010498	57570750	chr18	57570691	+	hs|18q21.32	NM_021127	chr18:57570691-57570750	NM_021127	Hs.96
A_33_P3295655	2.64444	1.40296	2.64444	up	0.796654	0.749585	-0.629841	-0.629841	APBA1	amyloid beta (A4) precursor protein-binding, family A, member 1	FALSE	Homo sapiens amyloid beta (A4) precursor protein-binding, family A, member 1 (APBA1), mRNA [NM_001163]	320	GO:0010468|GO:0005515|GO:0048471|GO:0005794|GO:0005886|GO:0014051|GO:0005546|GO:0007268|GO:0005634|GO:0030165|GO:0032403|GO:0014047|GO:0001701|GO:0006886|GO:0008021|GO:0007399|GO:0043234|GO:0001540|GO:0006461|GO:0035264|GO:0008088|GO:0007626|GO:0007155	72042509	chr9	72042450	-	hs|9q21.11	NM_001163	chr9:72042509-72042450	NM_001163	Hs.171939
A_33_P3243394	2.2946	1.19824	2.2946	up	0.557382	0.644969	-0.597068	-0.597068	SLMAP	sarcolemma associated protein	FALSE	sarcolemma associated protein [Source:HGNC Symbol;Acc:HGNC:16643] [ENST00000383718]	7871	GO:0042383|GO:0005515|GO:0006936|GO:0005815|GO:0005887|GO:0005790	57883156	chr3	57883097	+	hs|3p14.3	AK124200	chr3:57883097-57883156		Hs.476432
A_32_P105825	2.51336	1.32962	2.51336	up	0.8052	0.452565	-0.700735	-0.700735	MPPED2	metallophosphoesterase domain containing 2	FALSE	Homo sapiens metallophosphoesterase domain containing 2 (MPPED2), transcript variant 1, mRNA [NM_001584]	744	GO:0016787|GO:0008152|GO:0046872|GO:0007399	30601929	chr11	30601870	-	hs|11p14.1	NM_001584	chr11:30601929-30601870	NM_001584	Hs.289795
A_24_P353638	2.19012	1.13101	2.19012	up	0.887464	0.769163	-0.302696	-0.302696	SLAMF7	SLAM family member 7	FALSE	Homo sapiens SLAM family member 7 (SLAMF7), transcript variant 1, mRNA [NM_021181]	57823	GO:0030101|GO:0042267|GO:0004872|GO:0016021|GO:0007155	160724461	chr1	160724402	+	hs|1q23.3	NM_021181	chr1:160724402-160724461	NM_021181	Hs.517265
A_19_P00805006	2.56886	1.36113	2.56886	up	0.248813	0.136871	-1.16829	-1.16829	MALAT1	metastasis associated lung adenocarcinoma transcript 1 (non-protein coding)	FALSE	Homo sapiens metastasis associated lung adenocarcinoma transcript 1 (non-protein coding) (MALAT1), long non-coding RNA [NR_002819]	378938		65273930	chr11	65273871	+	hs|11q13.1	NR_002819	chr11:65273871-65273930	NR_002819	Hs.621695
A_33_P3299834	2.12875	1.09	2.12875	up	0.13889	0.0381074	-1.00151	-1.00151	POLR2E	polymerase (RNA) II (DNA directed) polypeptide E, 25kDa	FALSE	Homo sapiens polymerase (RNA) II (DNA directed) polypeptide E, 25kDa (POLR2E), mRNA [NM_002695]	5434	GO:0008380|GO:0005515|GO:0010467|GO:0006386|GO:0006368|GO:0006385|GO:0006367|GO:0006366|GO:0006363|GO:0006362|GO:0006361|GO:0005634|GO:0006360|GO:0006383|GO:0005829|GO:0005736|GO:0034587|GO:0005665|GO:0016032|GO:0005666|GO:0032481|GO:0035019|GO:0003899|GO:0006370|GO:0003677|GO:0050434|GO:0006281|GO:0001056|GO:0000398|GO:0006283|GO:0045814|GO:0045087|GO:0001055|GO:0001054|GO:0040029|GO:0005654|GO:…	1086639	chr19	1086580	-	hs|19p13.3	NM_002695	chr19:1086639-1086580	NM_002695	Hs.24301
A_23_P147025	2.32605	1.21788	2.32605	up	1.0222	0.854455	-0.279556	-0.279556	RAB33A	RAB33A, member RAS oncogene family	FALSE	Homo sapiens RAB33A, member RAS oncogene family (RAB33A), mRNA [NM_004794]	9363	GO:0005515|GO:0005794|GO:0005886|GO:0019882|GO:0008152|GO:2000785|GO:0003924|GO:0032482|GO:0019003|GO:0005525|GO:0006886	129318817	chrX	129318758	+	hs|Xq26.1	NM_004794	chrX:129318758-129318817	NM_004794	Hs.654356
A_21_P0000511	2.24734	1.16822	2.24734	up	0.455852	0.392011	-0.744285	-0.744285	SNAR-H	small ILF3/NF90-associated RNA H	FALSE	Homo sapiens small ILF3/NF90-associated RNA H (SNAR-H), small nuclear RNA [NR_024342]	100170221		78182103	chr2	78182044	-	hs|2p12	NR_024342	chr2:78182103-78182044	NR_024342	Hs.717311
A_33_P3370094	2.03394	1.02428	2.03394	up	0.718235	0.626962	-0.351677	-0.351677	MME	membrane metallo-endopeptidase	FALSE	Homo sapiens membrane metallo-endopeptidase (MME), transcript variant 2b, mRNA [NM_007289]	4311	GO:0005515|GO:0030424|GO:0005886|GO:0002003|GO:0045202|GO:0030425|GO:0005737|GO:0006508|GO:0070062|GO:0042277|GO:0044306|GO:0001822|GO:0071492|GO:0071493|GO:0046449|GO:0019233|GO:0050435|GO:0008021|GO:0005903|GO:0004175|GO:0071345|GO:0005887|GO:0008270|GO:0016021|GO:0090399|GO:0004222|GO:0005925|GO:0044267|GO:0006518|GO:0008238	154898275	chr3	154898216	+	hs|3q25.2	NM_007289	chr3:154898216-154898275	NM_007289	Hs.307734
A_23_P92499	3.04823	1.60797	3.04823	up	1.88812	1.71824	0.195211	0.195211	TLR2	toll-like receptor 2	FALSE	Homo sapiens toll-like receptor 2 (TLR2), mRNA [NM_003264]	7097	GO:0005515|GO:0032755|GO:0034123|GO:0042995|GO:0006691|GO:0032757|GO:0042497|GO:0042498|GO:0002752|GO:0002755|GO:0042495|GO:0042496|GO:0044130|GO:0031663|GO:0032728|GO:0032868|GO:0038124|GO:0046982|GO:0009986|GO:0032760|GO:0038123|GO:0034134|GO:0042834|GO:0042535|GO:0009636|GO:0032722|GO:0002224|GO:0005887|GO:0045087|GO:0032570|GO:0009897|GO:0008329|GO:0004888|GO:0042346|GO:0008285|GO:0034142|GO:…	154626465	chr4	154626406	+	hs|4q31.3	NM_003264	chr4:154626406-154626465	NM_003264	Hs.519033
A_21_P0008490	3.37959	1.75685	3.37959	up	0.358159	0.473331	-1.3411	-1.3411	lnc-RTL1-6	lnc-RTL1-6:1	FALSE	LNCipedia lincRNA (lnc-RTL1-6), lincRNA [lnc-RTL1-6:1]			101820284	chr14	101820225	-	hs|14q32.31		chr14:101820284-101820225
A_23_P114983	2.31155	1.20886	2.31155	up	-0.240207	-0.0921862	-1.37506	-1.37506	TRIM63	tripartite motif containing 63, E3 ubiquitin protein ligase	FALSE	Homo sapiens tripartite motif containing 63, E3 ubiquitin protein ligase (TRIM63), mRNA [NM_032588]	84676	GO:0005515|GO:0010468|GO:0030018|GO:0004842|GO:0016567|GO:0016874|GO:0005874|GO:0005634|GO:0014732|GO:0031430|GO:0031432|GO:0007165|GO:0005737|GO:0006936|GO:0014878|GO:0043161|GO:0008270|GO:0004871|GO:0070555|GO:0071549	26377901	chr1	26377842	-	hs|1p36.11	NM_032588	chr1:26377901-26377842	NM_032588	Hs.279709
A_21_P0005579	2.05959	1.04236	2.05959	up	-0.0144284	0.0144284	-1.04236	-1.04236	lnc-TMEM140-1	lnc-TMEM140-1:1	FALSE	AGENCOURT_16391134 NIH_MGC_227 Homo sapiens cDNA clone IMAGE:30718868 5', mRNA sequence [CK001067]			134855905	chr7	134855846	+	hs|7q33		chr7:134855846-134855905		Hs.689673
A_33_P3257297	2.22306	1.15255	2.22306	up	0.92671	0.59837	-0.390008	-0.390008	CFAP58	cilia and flagella associated protein 58	FALSE	Homo sapiens cilia and flagella associated protein 58 (CFAP58), mRNA [NM_001008723]	159686	GO:0005615	106214835	chr10	106214776	+	hs|10q25.1	NM_001008723	chr10:106214776-106214835	NM_001008723	Hs.253576
A_33_P3246883	2.71345	1.44013	2.71345	up	1.70952	2.22816	0.528706	0.528706	DMKN	dermokine	FALSE	Homo sapiens dermokine (DMKN), transcript variant 2, mRNA [NM_033317]	93099	GO:0005515|GO:0005615|GO:0070062	35990920	chr19	35990861	-	hs|19q13.12	NM_033317	chr19:35990920-35990861	NM_033317	Hs.417795
A_21_P0014790	2.24451	1.1664	2.24451	up	0.593707	0.691828	-0.523633	-0.523633			FALSE				124081285	chr12	124081226	-	hs|12q24.31		chr12:124081285-124081226
A_23_P55356	2.04196	1.02995	2.04196	up	0.821372	0.863554	-0.187488	-0.187488	VMO1	vitelline membrane outer layer 1 homolog (chicken)	FALSE	Homo sapiens vitelline membrane outer layer 1 homolog (chicken) (VMO1), transcript variant 1, mRNA [NM_182566]	284013	GO:0008150|GO:0003674|GO:0070062	4688732	chr17	4688673	-	hs|17p13.2	NM_182566	chr17:4688732-4688673	NM_182566	Hs.122561
A_23_P321354	2.0452	1.03224	2.0452	up	0.0206256	-0.137093	-1.09047	-1.09047	TMEM71	transmembrane protein 71	FALSE	Homo sapiens transmembrane protein 71 (TMEM71), transcript variant 1, mRNA [NM_144649]	137835	GO:0016021	133722596	chr8	133722537	-	hs|8q24.22	NM_144649	chr8:133722596-133722537	NM_144649	Hs.293842
A_24_P227927	2.7849	1.47763	2.7849	up	0.918841	1.00905	-0.51368	-0.51368	IL21R	interleukin 21 receptor	FALSE	Homo sapiens interleukin 21 receptor (IL21R), transcript variant 2, mRNA [NM_181078]	50615	GO:0030101|GO:0016021|GO:0001532|GO:0038114	27461383	chr16	27461324	+	hs|16p12.1	NM_181078	chr16:27461324-27461383	NM_181078	Hs.210546
A_23_P202071	2.16538	1.11462	2.16538	up	-0.211883	-0.0590177	-1.25007	-1.25007	CELF2	CUGBP, Elav-like family member 2	FALSE	Homo sapiens CUGBP, Elav-like family member 2 (CELF2), transcript variant 3, mRNA [NM_001025077]	10659	GO:0006397|GO:0006396|GO:0005737|GO:0000166|GO:0003723|GO:0008016|GO:0005634	11376284	chr10	11376225	+	hs|10p14	NM_001025077	chr10:11376225-11376284	NM_001025077	Hs.309288
A_21_P0001708	2.61514	1.38689	2.61514	up	1.39578	1.06652	-0.155735	-0.155735	lnc-HMCN1-2	lnc-HMCN1-2:2	FALSE	LNCipedia lincRNA (lnc-HMCN1-2), lincRNA [lnc-HMCN1-2:2]			185590104	chr1	185532449	+	hs|1q25.3		chr1:185532449-185590104
A_33_P3243454	3.98898	1.99602	3.98898	up	1.90608	1.72313	-0.181414	-0.181414	IGFL3	IGF-like family member 3	FALSE	Homo sapiens IGF-like family member 3 (IGFL3), mRNA [NM_207393]	388555	GO:0005576	46623513	chr19	46623454	-	hs|19q13.32	NM_207393	chr19:46623513-46623454	NM_207393	Hs.365496
A_21_P0004030	5.40921	2.43542	5.40921	up	2.48246	2.31852	-0.0349255	-0.0349255			FALSE				91751380	chr5	91751321	+	hs|5q14.3		chr5:91751321-91751380
A_33_P3419621	2.12878	1.09002	2.12878	up	0.199471	0.0754085	-0.952584	-0.952584	LOC100289580	uncharacterized LOC100289580	FALSE	Homo sapiens uncharacterized LOC100289580 (LOC100289580), long non-coding RNA [NR_103774]	100289580		88807807	chr16	88807748	+	hs|16q24.3	NR_103774	chr16:88807748-88807807	NR_103774	Hs.437712
A_19_P00800206	2.34336	1.22858	2.34336	up	1.25533	0.967955	-0.116936	-0.116936	LOC400958	uncharacterized LOC400958	FALSE	Homo sapiens uncharacterized LOC400958 (LOC400958), long non-coding RNA [NR_036586]	400958		65129780	chr2	65129721	-	hs|2p14		chr2:65129780-65129721	NR_036586	Hs.591565
A_32_P211248	4.04836	2.01734	4.04836	up	0.183602	-0.0142996	-1.93269	-1.93269	LINC01405	long intergenic non-protein coding RNA 1405	FALSE	Homo sapiens long intergenic non-protein coding RNA 1405 (LINC01405), long non-coding RNA [NR_036513]	100131138		111375252	chr12	111375193	+	hs|12q24.11	NR_036513	chr12:111375193-111375252	NR_036513	Hs.152129
A_21_P0006336	2.21961	1.1503	2.21961	up	0.0803189	0.422056	-0.899116	-0.899116	lnc-AGPAT2-2	lnc-AGPAT2-2:4	FALSE	LNCipedia lincRNA (lnc-AGPAT2-2), lincRNA [lnc-AGPAT2-2:4]			139506605	chr9	139506546	-	hs|9q34.3		chr9:139506605-139506546		Hs.609301
A_21_P0002859	3.36661	1.7513	3.36661	up	-0.132945	0.132945	-1.7513	-1.7513			FALSE				72554016	chr3	72553957	-	hs|3p13		chr3:72554016-72553957
A_21_P0009265	2.09308	1.06562	2.09308	up	0.852003	1.04019	-0.119529	-0.119529	LOC100507002	uncharacterized LOC100507002	FALSE	Homo sapiens uncharacterized LOC100507002 (LOC100507002), long non-coding RNA [NR_110801]	100507002		63107018	chr17	63106959	+	hs|17q24.1	NR_110801	chr17:63106959-63107018	NR_110801	Hs.729924
A_24_P318656	2.03248	1.02324	2.03248	up	0.808732	0.473676	-0.382037	-0.382037	ITGB3	integrin, beta 3 (platelet glycoprotein IIIa, antigen CD61)	FALSE	Homo sapiens integrin, beta 3 (platelet glycoprotein IIIa, antigen CD61) (ITGB3), mRNA [NM_000212]	3690	GO:0005515|GO:0031527|GO:0050731|GO:0031528|GO:0050900|GO:0002020|GO:0042802|GO:0007411|GO:0006457|GO:0030198|GO:0034446|GO:0034113|GO:0050839|GO:0070062|GO:0008305|GO:0042470|GO:0010745|GO:0009986|GO:0031589|GO:0050840|GO:0003756|GO:0014909|GO:0030168|GO:0005161|GO:0050748|GO:0038027|GO:0010595|GO:0043235|GO:0007229|GO:0005887|GO:0034683|GO:0042060|GO:0032369|GO:0007044|GO:0016049|GO:0043184|GO:…	45389086	chr17	45389027	+	hs|17q21.32	NM_000212	chr17:45389027-45389086	NM_000212	Hs.218040
A_33_P3283430	2.40723	1.26737	2.40723	up	0.913173	0.540524	-0.540524	-0.540524	SEL1L2	sel-1 suppressor of lin-12-like 2 (C. elegans)	FALSE	Homo sapiens sel-1 suppressor of lin-12-like 2 (C. elegans) (SEL1L2), transcript variant 1, mRNA [NM_001271539]	80343	GO:0016021	13830116	chr20	13830057	-	hs|20p12.1	NM_001271539	chr20:13830116-13830057	NM_001271539	Hs.590879
A_23_P94921	2.26276	1.17808	2.26276	up	1.08342	0.854182	-0.209278	-0.209278	SLC20A2	solute carrier family 20 (phosphate transporter), member 2	FALSE	Homo sapiens solute carrier family 20 (phosphate transporter), member 2 (SLC20A2), transcript variant 2, mRNA [NM_006749]	6575	GO:0005886|GO:0035435|GO:0009615|GO:0055085|GO:0005436|GO:0016020|GO:0001618|GO:0005887|GO:0006810|GO:0016032|GO:0004872|GO:0005315|GO:0035725|GO:0070062|GO:0006811	42274152	chr8	42274093	-	hs|8p11.21	NM_006749	chr8:42274152-42274093	NM_006749	Hs.653173
A_33_P3413840	5.05653	2.33815	5.05653	up	1.66177	1.76107	-0.626726	-0.626726	GK	glycerol kinase	FALSE	Homo sapiens glycerol kinase (GK), transcript variant 4, mRNA [NM_001205019]	2710	GO:0005515|GO:0004370|GO:0019563|GO:0005634|GO:0005741|GO:0044281|GO:0042593|GO:0005524|GO:0006071|GO:0046167|GO:0005829|GO:0016310|GO:0019432|GO:0006641|GO:0044255|GO:0070062	30746989	chrX	30739101	+	hs|Xp21.2	NM_001205019	chrX:30739101-30746989	NM_001205019	Hs.1466
A_33_P3687198	3.15596	1.65808	3.15596	up	1.04117	0.869996	-0.702497	-0.702497	HRK	harakiri, BCL2 interacting protein	FALSE	harakiri, BCL2 interacting protein [Source:HGNC Symbol;Acc:HGNC:5185] [ENST00000257572]	8739	GO:0032464|GO:0005739|GO:0005515|GO:0043065|GO:0090200|GO:0006915|GO:0016021	117294035	chr12	117293976	-	hs|12q24.22	AK094730	chr12:117294035-117293976		Hs.26605
A_21_P0007070	2.82292	1.49719	2.82292	up	1.31974	1.15143	-0.2616	-0.2616	lnc-RPP30-2	lnc-RPP30-2:1	FALSE	LNCipedia lincRNA (lnc-RPP30-2), lincRNA [lnc-RPP30-2:1]			92750040	chr10	92749981	+	hs|10q23.31		chr10:92749981-92750040
A_21_P0000249	3.77606	1.91688	3.77606	up	0.199542	0.144859	-1.74468	-1.74468	SNORD24	small nucleolar RNA, C/D box 24	FALSE	Homo sapiens small nucleolar RNA, C/D box 24 (SNORD24), small nucleolar RNA [NR_002447]	26820		136216325	chr9	136216266	+	hs|9q34.2	NR_002447	chr9:136216266-136216325	NR_002447	Hs.745542
A_23_P55616	2.86206	1.51706	2.86206	up	1.02309	0.949988	-0.530516	-0.530516	SLC14A1	solute carrier family 14 (urea transporter), member 1 (Kidd blood group)	FALSE	Homo sapiens solute carrier family 14 (urea transporter), member 1 (Kidd blood group) (SLC14A1), transcript variant 4, mRNA [NM_001146037]	6563	GO:0016323|GO:0005886|GO:0005887|GO:0005372|GO:0015265|GO:0015204|GO:0006833|GO:0071918|GO:0055085|GO:0015840	43330300	chr18	43330241	+	hs|18q12.3	NM_001146037	chr18:43330241-43330300	NM_001146037	Hs.101307
A_21_P0007203	3.03506	1.60173	3.03506	up	-0.379988	-0.560042	-2.07174	-2.07174	lnc-PRDM11-2	lnc-PRDM11-2:1	FALSE	LNCipedia lincRNA (lnc-PRDM11-2), lincRNA [lnc-PRDM11-2:1]			45063146	chr11	45030105	+	hs|11p11.2		chr11:45030105-45063146
A_33_P3401156	2.07173	1.05084	2.07173	up	0.865745	0.509467	-0.363231	-0.363231	ETV1	ets variant 1	FALSE	Homo sapiens ets variant 1 (ETV1), transcript variant 1, mRNA [NM_004956]	2115	GO:0005515|GO:0003700|GO:0006357|GO:0006366|GO:0000981|GO:0005634|GO:0000978|GO:0030154|GO:0001077|GO:0007517|GO:0007411|GO:0045944|GO:0048935|GO:0007638	13933454	chr7	13933395	-	hs|7p21.2	NM_004956	chr7:13933454-13933395	NM_004956	Hs.22634
A_23_P396858	2.18684	1.12885	2.18684	up	0.742713	0.591869	-0.461555	-0.461555	FZD8	frizzled class receptor 8	FALSE	Homo sapiens frizzled class receptor 8 (FZD8), mRNA [NM_031866]	8325	GO:0042813|GO:0005515|GO:0017147|GO:0033077|GO:0005794|GO:0005886|GO:0004930|GO:0005102|GO:0000122|GO:0001525|GO:0030165|GO:0007186|GO:0045944|GO:0030182|GO:0043507|GO:0016021|GO:0060070|GO:0031625|GO:0035567	35927437	chr10	35927378	-	hs|10p11.21	NM_031866	chr10:35927437-35927378	NM_031866	Hs.302634
A_21_P0013944	2.0708	1.05019	2.0708	up	0.0929255	0.269266	-0.86909	-0.86909	lnc-JMJD7-PLA2G4B-1	lnc-JMJD7-PLA2G4B-1:4	FALSE	Homo sapiens, clone IMAGE:4704591, mRNA, partial cds. [BC022404]			42187530	chr15	42187471	+	hs|15q15.1	BC022404	chr15:42187471-42187530		Hs.650238
A_21_P0012167	2.03722	1.02661	2.03722	up	1.67508	1.52257	0.572223	0.572223	XLOC_l2_008976		FALSE	BROAD Institute lincRNA (XLOC_l2_008976), lincRNA [TCONS_l2_00016966]			14724906	chr21	14724847	+	hs|21q11.2		chr21:14724847-14724906
A_23_P110791	2.16623	1.11518	2.16623	up	1.07013	1.0604	-0.049921	-0.049921	CSF1R	colony stimulating factor 1 receptor	FALSE	Homo sapiens colony stimulating factor 1 receptor (CSF1R), transcript variant 1, mRNA [NM_005211]	1436	GO:0008284|GO:0071902|GO:0005886|GO:0008283|GO:0061098|GO:0008360|GO:0019221|GO:0045124|GO:2000147|GO:0042803|GO:0031529|GO:2000249|GO:0046777|GO:0006954|GO:0030225|GO:0030224|GO:0070374|GO:0060603|GO:0090197|GO:0030097|GO:0038145|GO:0030335|GO:0036006|GO:0009986|GO:0048015|GO:0042517|GO:0019903|GO:0046488|GO:0030316|GO:0007275|GO:0018108|GO:0005524|GO:0045217|GO:0043235|GO:0007165|GO:0019955|GO:…	149432920	chr5	149432861	-	hs|5q32	NM_005211	chr5:149432920-149432861	NM_005211	Hs.586219
A_21_P0012213	2.37403	1.24734	2.37403	up	0.29604	0.599048	-0.799797	-0.799797	lnc-BACH1-1	lnc-BACH1-1:1	FALSE	Homo sapiens chromosome 21 open reading frame 109 (C21orf109) mRNA, complete cds. [AF490769]			30660346	chr21	30601330	+	hs|21q21.3		chr21:30601330-30660346
A_23_P19624	3.28664	1.71661	3.28664	up	1.12493	1.24972	-0.529291	-0.529291	BMP6	bone morphogenetic protein 6	FALSE	Homo sapiens bone morphogenetic protein 6 (BMP6), mRNA [NM_001718]	654	GO:0051216|GO:0001654|GO:0050714|GO:0060395|GO:0005615|GO:0006879|GO:0030539|GO:0005737|GO:0006955|GO:0006954|GO:0045944|GO:0043408|GO:0010039|GO:0032026|GO:0032332|GO:0032526|GO:0050679|GO:0014823|GO:0030501|GO:0046982|GO:0001822|GO:0031988|GO:0010862|GO:0051384|GO:0042981|GO:0003323|GO:0030509|GO:2000860|GO:0005160|GO:0005125|GO:0001649|GO:0045669|GO:0001958|GO:0001501|GO:0001938|GO:0070700|GO:…	7881454	chr6	7881395	+	hs|6p24.3	NM_001718	chr6:7881395-7881454	NM_001718	Hs.285671
A_24_P255384	2.34503	1.22961	2.34503	up	0.254257	0.118492	-1.04323	-1.04323			FALSE	RL31_HUMAN (P62899) 60S ribosomal protein L31, partial (97%) [THC2598564]			110802597	chr9	110802538	+	hs|9q31.2		chr9:110802538-110802597
A_23_P204158	2.16325	1.1132	2.16325	up	0.531237	0.428559	-0.633303	-0.633303	RNFT2	ring finger protein, transmembrane 2	FALSE	Homo sapiens ring finger protein, transmembrane 2 (RNFT2), transcript variant 2, mRNA [NM_032814]	84900	GO:0008270|GO:0016021	117290574	chr12	117290515	+	hs|12q24.22	NM_032814	chr12:117290515-117290574	NM_032814	Hs.437195
A_21_P0009268	2.2223	1.15205	2.2223	up	1.22461	0.872418	-0.103541	-0.103541	lnc-MAP2K6-2	lnc-MAP2K6-2:1	FALSE	LNCipedia lincRNA (lnc-MAP2K6-2), lincRNA [lnc-MAP2K6-2:1]			67841626	chr17	67708680	+	hs|17q24.3		chr17:67708680-67841626
A_24_P481824	2.1065	1.07485	2.1065	up	0.0565548	-0.0565548	-1.07485	-1.07485	DPY19L4	dpy-19-like 4 (C. elegans)	FALSE	Homo sapiens dpy-19-like 4 (C. elegans) (DPY19L4), mRNA [NM_181787]	286148	GO:0000030|GO:0018406|GO:0005637|GO:0016021	95806038	chr8	95805979	+	hs|8q22.1	NM_181787	chr8:95805979-95806038	NM_181787	Hs.567828
A_23_P111402	2.22202	1.15187	2.22202	up	0.948144	0.543902	-0.405846	-0.405846	RSPO3	R-spondin 3	FALSE	Homo sapiens R-spondin 3 (RSPO3), mRNA [NM_032784]	84870	GO:0005109|GO:0001664|GO:0090263|GO:0060670|GO:0005102|GO:0005576|GO:0060070|GO:0008201|GO:0005615	127518093	chr6	127518034	+	hs|6q22.33	NM_032784	chr6:127518034-127518093	NM_032784	Hs.135254
A_23_P90601	2.45066	1.29317	2.45066	up	1.15167	0.934858	-0.249908	-0.249908	STEAP3	STEAP family member 3, metalloreductase	FALSE	Homo sapiens STEAP family member 3, metalloreductase (STEAP3), transcript variant 1, mRNA [NM_182915]	55240	GO:0005515|GO:0052851|GO:0009306|GO:0000293|GO:0005886|GO:0005771|GO:0006915|GO:0008823|GO:0055085|GO:0046872|GO:0006879|GO:0033572|GO:0007049|GO:0015677|GO:0016021|GO:0010008|GO:0055114	120023057	chr2	120022998	+	hs|2q14.2	NM_182915	chr2:120022998-120023057	NM_182915	Hs.647822
A_33_P3337733	2.33698	1.22465	2.33698	up	1.32165	1.12764	0	0			FALSE	Homo sapiens cDNA FLJ45831 fis, clone NT2RP8007416. [AK127731]			14671053	chr17	14670994	-	hs|17p12	AK127731	chr17:14671053-14670994		Hs.446616
A_21_P0014607	2.81208	1.49164	2.81208	up	-0.0744517	-0.112264	-1.585	-1.585			FALSE				40839876	chr1	40839817	-	hs|1p34.2		chr1:040839876-040839817
A_33_P3346331	2.49998	1.32192	2.49998	up	0.610616	0.52981	-0.751703	-0.751703			FALSE				111779606	chr11	111779547	+	hs|11q23.1		chr11:111779547-111779606
A_23_P116898	2.36392	1.24118	2.36392	up	1.9339	1.75051	0.601022	0.601022	A2M	alpha-2-macroglobulin	FALSE	Homo sapiens alpha-2-macroglobulin (A2M), mRNA [NM_000014]	2	GO:0005515|GO:0007264|GO:0004867|GO:0072562|GO:0002020|GO:0019959|GO:0005829|GO:0019966|GO:0019838|GO:0022617|GO:0030198|GO:0031093|GO:0070062|GO:0001869|GO:0051056|GO:0043120|GO:0005102|GO:0030168|GO:0005576|GO:0010951|GO:0048863|GO:0007596|GO:0007597|GO:0002576|GO:0019899|GO:0048306	9221418	chr12	9221359	-	hs|12p13.31	NM_000014	chr12:9221418-9221359	NM_000014	Hs.212838
A_33_P3405424	2.27575	1.18634	2.27575	up	0.510317	0.325829	-0.768271	-0.768271	IL4I1	interleukin 4 induced 1	FALSE	Homo sapiens interleukin 4 induced 1 (IL4I1), transcript variant 1, mRNA [NM_152899]	259307	GO:0001716|GO:0005576|GO:0005764|GO:0055114	50392976	chr19	50392917	-	hs|19q13.33	NM_152899	chr19:50392976-50392917	NM_152899	Hs.741750
A_21_P0012578	3.40811	1.76897	3.40811	up	0.540123	0.387565	-1.30513	-1.30513	XLOC_l2_010602		FALSE	BROAD Institute lincRNA (XLOC_l2_010602), lincRNA [TCONS_l2_00020446]			23123030	chr4	23122971	+	hs|4p15.2		chr4:23122971-23123030
A_33_P3269650	2.59527	1.37589	2.59527	up	0.72508	0.452786	-0.786953	-0.786953			FALSE				97512960	chr7	97512901	+	hs|7q21.3	AK124574	chr7:97512901-97512960		Hs.689574
A_21_P0000121	3.8669	1.95118	3.8669	up	0.371428	-0.223417	-1.87717	-1.87717	C19orf81	chromosome 19 open reading frame 81	FALSE	Homo sapiens chromosome 19 open reading frame 81 (C19orf81), mRNA [NM_001195076]	342918		51162567	chr19	51162508	+	hs|19q13.33	NM_001195076	chr19:51162508-51162567	NM_001195076	Hs.531650
A_21_P0014435	2.79765	1.48421	2.79765	up	-0.0366688	0.175509	-1.41479	-1.41479	LOC100287728	uncharacterized LOC100287728	FALSE	Homo sapiens uncharacterized LOC100287728 (LOC100287728), long non-coding RNA [NR_103770]	100287728		134257529	chrX	134257470	+	hs|Xq26.3	NR_103770	chrX:134257470-134257529	NR_103770	Hs.371717
A_33_P3878964	2.47267	1.30607	2.47267	up	0.208208	0.216139	-1.0939	-1.0939	NAA25	N(alpha)-acetyltransferase 25, NatB auxiliary subunit	FALSE	Homo sapiens N(alpha)-acetyltransferase 25, NatB auxiliary subunit (NAA25), mRNA [NM_024953]	80018	GO:0005737|GO:0005794|GO:0005654	112465702	chr12	112465643	-	hs|12q24.13	NM_024953	chr12:112465702-112465643	NM_024953	Hs.530941
A_21_P0014075	2.94591	1.55871	2.94591	up	0.214988	-0.214988	-1.55871	-1.55871	FLG-AS1	FLG antisense RNA 1	FALSE	PREDICTED: Homo sapiens FLG antisense RNA 1 (FLG-AS1), misc_RNA [XR_108352]	339400		152339311	chr1	152339252	+	hs|1q21.3	XR_108352	chr1:152339252-152339311		Hs.23783
A_21_P0013123	2.56136	1.35691	2.56136	up	1.35444	0.942466	-0.20846	-0.20846			FALSE	zn81a04.x5 Stratagene lung carcinoma 937218 Homo sapiens cDNA clone IMAGE:564558 3', mRNA sequence [AI732419]			8342688	chr6	8342629	+	hs|6p24.3		chr6:8342629-8342688		Hs.734742
A_24_P323084	2.24001	1.16351	2.24001	up	0.956253	1.01099	-0.179885	-0.179885	LINC00482	long intergenic non-protein coding RNA 482	FALSE	Homo sapiens long intergenic non-protein coding RNA 482 (LINC00482), long non-coding RNA [NR_038080]	284185		79276696	chr17	79276637	-	hs|17q25.3	NR_038080	chr17:79276696-79276637	NR_038080	Hs.631762
A_23_P209731	3.04762	1.60768	3.04762	up	1.74546	1.48747	0.00878143	0.00878143	ARMC9	armadillo repeat containing 9	FALSE	Homo sapiens armadillo repeat containing 9 (ARMC9), transcript variant 2, mRNA [NM_025139]	80210	GO:0070062	232209867	chr2	232209808	+	hs|2q37.1	NM_025139	chr2:232209808-232209867	NM_025139	Hs.471610
A_23_P35256	44.7765	5.48467	44.7765	up	0.181417	0.0503962	-5.36876	-5.36876			FALSE	polymerase (RNA) III (DNA directed) polypeptide C (62kD) [Source:HGNC Symbol;Acc:HGNC:30076] [ENST00000334163]			145594972	chr1	145594157	-	hs|1q21.1	XM_005272927	chr1:145594972-145594157	XM_005272927	Hs.591457
A_33_P3278649	2.73287	1.45042	2.73287	up	0.060235	-0.269572	-1.55509	-1.55509	ENTPD2	ectonucleoside triphosphate diphosphohydrolase 2	FALSE	Homo sapiens ectonucleoside triphosphate diphosphohydrolase 2 (ENTPD2), transcript variant 1, mRNA [NM_203468]	954	GO:0017111|GO:0017110|GO:0007186|GO:0005886|GO:0009181|GO:0005789|GO:0005605|GO:0030168|GO:0016021|GO:0005524|GO:0070062	139942612	chr9	139942553	-	hs|9q34.3	NM_203468	chr9:139942612-139942553	NM_203468	Hs.123036
A_23_P89570	2.07167	1.0508	2.07167	up	0.666167	0.45457	-0.490428	-0.490428	ZMYND15	zinc finger, MYND-type containing 15	FALSE	Homo sapiens zinc finger, MYND-type containing 15 (ZMYND15), transcript variant 2, mRNA [NM_032265]	84225	GO:0005737|GO:0042826|GO:0007286|GO:0005634|GO:0045892|GO:0046872|GO:0006351	4649358	chr17	4649299	+	hs|17p13.2	NM_032265	chr17:4649299-4649358	NM_032265	Hs.47223
A_33_P3288329	2.05499	1.03913	2.05499	up	0.497673	0.420301	-0.580144	-0.580144	SORBS1	sorbin and SH3 domain containing 1	FALSE	Homo sapiens sorbin and SH3 domain containing 1 (SORBS1), transcript variant 8, mRNA [NM_001290294]	10580	GO:0005515|GO:0008092|GO:0008286|GO:0005886|GO:0005158|GO:0043149|GO:0005634|GO:0016363|GO:0005829|GO:0046889|GO:0005915|GO:0005737|GO:0005913|GO:0006936|GO:0015758|GO:0048041|GO:0046326|GO:0005899|GO:0005813|GO:0001725|GO:0032869|GO:0045725|GO:0019901|GO:0003779|GO:0009967|GO:0007160|GO:0005070|GO:0045121|GO:0005654|GO:0005924|GO:0005925|GO:0090004	97074875	chr10	97074816	-	hs|10q24.1	NM_001290294	chr10:97074875-97074816	NM_001290294	Hs.38621
A_19_P00813482	2.96448	1.56778	2.96448	up	0.319567	0.369123	-1.22343	-1.22343	CRHR1-IT1	CRHR1 intronic transcript 1 (non-protein coding)	FALSE	Homo sapiens CRHR1 intronic transcript 1 (non-protein coding) (CRHR1-IT1), transcript variant 1, long non-coding RNA [NR_026905]	147081	GO:0005576	43719252	chr17	43719193	+	hs|17q21.31	NR_026905	chr17:43719193-43719252	NR_026905	Hs.128813
A_21_P0013955	2.11356	1.07967	2.11356	up	0.442747	0.326305	-0.695149	-0.695149	lnc-TMEM18-12	lnc-TMEM18-12:1	FALSE	PREDICTED: Homo sapiens formin-like protein 16-like (LOC101060391), mRNA [XM_006710125]			945382	chr2	945323	-	hs|2p25.3	XM_006710125	chr2:945382-945323	XM_006710125	Hs.120377
A_33_P3257027	2.21546	1.14761	2.21546	up	1.28359	1.1063	0.0473392	0.0473392	FGF7	fibroblast growth factor 7	FALSE	Homo sapiens fibroblast growth factor 7 (FGF7), mRNA [NM_002009]	2252	GO:0008286|GO:0005515|GO:0010838|GO:0008284|GO:0051549|GO:0010463|GO:0050731|GO:0031069|GO:0060665|GO:0007173|GO:0060501|GO:0051781|GO:0008201|GO:0050679|GO:0048011|GO:0005794|GO:0031532|GO:0048015|GO:0009611|GO:0005576|GO:0005104|GO:0042056|GO:0050918|GO:0007165|GO:0008544|GO:0008543|GO:0034394|GO:0045087|GO:0061033|GO:0008083|GO:0038095|GO:0060445	49776869	chr15	49776810	+	hs|15q21.2	NM_002009	chr15:49776810-49776869	NM_002009	Hs.567268
A_21_P0007433	2.02485	1.01781	2.02485	up	0.276927	0.0431669	-0.857764	-0.857764	lnc-FSHB-2	lnc-FSHB-2:5	FALSE	LNCipedia lincRNA (lnc-FSHB-2), lincRNA [lnc-FSHB-2:5]			29652223	chr11	29652164	+	hs|11p14.1		chr11:29652164-29652223
A_23_P254507	2.3276	1.21885	2.3276	up	0.857898	0.697328	-0.441232	-0.441232	HOPX	HOP homeobox	FALSE	Homo sapiens HOP homeobox (HOPX), transcript variant 2, mRNA [NM_139211]	84525	GO:0016575|GO:0048286|GO:0008016|GO:0043393|GO:0005634|GO:0000122|GO:0001829|GO:0003677|GO:0006351|GO:0007507|GO:0043415|GO:0051155|GO:0045596	57514502	chr4	57514443	-	hs|4q12	NM_139211	chr4:57514502-57514443	NM_139211	Hs.619396
A_33_P3330149	2.05414	1.03853	2.05414	up	1.09297	0.734083	-0.125003	-0.125003	PAX6	paired box 6	FALSE	Homo sapiens paired box 6 (PAX6), transcript variant 1, mRNA [NM_000280]	5080	GO:0005515|GO:0004842|GO:0000790|GO:0003700|GO:0006366|GO:0000981|GO:0001654|GO:0001755|GO:0000132|GO:0007224|GO:0003309|GO:0021796|GO:0003690|GO:0021798|GO:0007411|GO:0021797|GO:0022027|GO:0009887|GO:0019901|GO:0023019|GO:0001709|GO:0021549|GO:0003322|GO:0000122|GO:0000978|GO:0007417|GO:0000979|GO:0021593|GO:0010975|GO:0005654|GO:0008134|GO:0016567|GO:0021983|GO:0005634|GO:0009950|GO:0005737|GO:…	31810639	chr11	31810580	-	hs|11p13	NM_000280	chr11:31810639-31810580	NM_000280	Hs.270303
A_21_P0011895	2.64692	1.40432	2.64692	up	0.213001	0.0835021	-1.25607	-1.25607	LOC102723927	uncharacterized LOC102723927	FALSE		102723927		242913527	chr2	242913468	+	hs|2q37.3		chr2:242913468-242913527	XR_425551
A_23_P363365	4.50291	2.17086	4.50291	up	-0.359524	0.340223	-2.18051	-2.18051	RXFP3	relaxin/insulin-like family peptide receptor 3	FALSE	Homo sapiens relaxin/insulin-like family peptide receptor 3 (RXFP3), mRNA [NM_016568]	51289	GO:0007186|GO:0005886|GO:0032467|GO:0005887|GO:0004930|GO:0051482|GO:0008528	33937936	chr5	33937877	+	hs|5p13.2	NM_016568	chr5:33937877-33937936	NM_016568	Hs.170146
A_21_P0008347	2.57767	1.36607	2.57767	up	1.31833	0.886656	-0.26357	-0.26357	lnc-FUT8-1	lnc-FUT8-1:1	FALSE	LNCipedia lincRNA (lnc-FUT8-1), lincRNA [lnc-FUT8-1:1]			66220716	chr14	66220657	+	hs|14q23.3		chr14:66220657-66220716
A_23_P82979	2.19433	1.13378	2.19433	up	-0.820629	-0.425371	-1.75678	-1.75678	LAMC3	laminin, gamma 3	FALSE	Homo sapiens laminin, gamma 3 (LAMC3), mRNA [NM_006059]	10319	GO:0000904|GO:0060041|GO:0016020|GO:0030198|GO:0014002|GO:0005198|GO:0005578|GO:0005576|GO:0007155|GO:0007601|GO:0005604	133967341	chr9	133967284	+	hs|9q34.12	NM_006059	chr9:133967284-133967341	NM_006059	Hs.201805
A_21_P0009261	2.9283	1.55006	2.9283	up	1.61481	1.1246	-0.180358	-0.180358	lnc-MSI2-2	lnc-MSI2-2:1	FALSE	LNCipedia lincRNA (lnc-MSI2-2), lincRNA [lnc-MSI2-2:1]			55282423	chr17	55282364	+	hs|17q22		chr17:55282364-55282423
A_23_P92730	3.86111	1.94902	3.86111	up	1.32382	1.21024	-0.681989	-0.681989	HSPB3	heat shock 27kDa protein 3	FALSE	Homo sapiens heat shock 27kDa protein 3 (HSPB3), mRNA [NM_006308]	8988	GO:0006986|GO:0005737|GO:0005634	53752143	chr5	53752084	+	hs|5q11.2	NM_006308	chr5:53752084-53752143	NM_006308	Hs.41707
A_21_P0000255	2.41969	1.27482	2.41969	up	0.0593588	0.178063	-1.15611	-1.15611	SNORD30	small nucleolar RNA, C/D box 30	FALSE	Homo sapiens small nucleolar RNA, C/D box 30 (SNORD30), small nucleolar RNA [NR_002561]	9299		62621194	chr11	62621135	-	hs|11q12.3	NR_002561	chr11:62621194-62621135	NR_002561
A_21_P0007786	2.78296	1.47662	2.78296	up	0.652189	0.343488	-0.97878	-0.97878	LINC00944	long intergenic non-protein coding RNA 944	FALSE	Homo sapiens long intergenic non-protein coding RNA 944 (LINC00944), long non-coding RNA [NR_033878]	387895		127230820	chr12	127216910	-	hs|12q24.32	NR_033878	chr12:127230820-127216910	NR_033878	Hs.534660
A_21_P0011914	2.07263	1.05146	2.07263	up	-0.00367784	-0.175209	-1.14091	-1.14091	XLOC_l2_008009		FALSE	BROAD Institute lincRNA (XLOC_l2_008009), lincRNA [TCONS_l2_00014564]			47958573	chr2	47958514	-	hs|2p16.3		chr2:47958573-47958514
A_33_P3323822	2.00668	1.00481	2.00668	up	0.118025	-0.024101	-0.957847	-0.957847	GATAD2B	GATA zinc finger domain containing 2B	FALSE	Homo sapiens GATA zinc finger domain containing 2B (GATAD2B), mRNA [NM_020699]	57459	GO:0043234|GO:0006355|GO:0000790|GO:0003700|GO:0016607|GO:0043044|GO:0031492|GO:0008270|GO:0005654|GO:0000980|GO:0000978|GO:0006351	153777333	chr1	153777274	-	hs|1q21.3	NM_020699	chr1:153777333-153777274	NM_020699	Hs.4779
A_33_P3213149	2.65853	1.41063	2.65853	up	0.183741	-0.18374	-1.41063	-1.41063			FALSE	transmembrane phosphatase with tensin homology pseudogene 1 [Source:HGNC Symbol;Acc:HGNC:43648] [ENST00000426585]			17131243	chr22	17131184	+	hs|22q11.1		chr22:17131184-17131243		Hs.474116
A_24_P93896	8.53994	3.09423	8.53994	up	1.63725	0.834054	-1.85858	-1.85858	CNNM2	cyclin and CBS domain divalent metal cation transport mediator 2	FALSE	Homo sapiens cyclin and CBS domain divalent metal cation transport mediator 2 (CNNM2), transcript variant 3, mRNA [NM_199077]	54805	GO:0016323|GO:0015693|GO:0010960|GO:0016021	104687178	chr10	104687119	+	hs|10q24.32	NM_199077	chr10:104687119-104687178	NM_199077	Hs.643509
A_33_P3364180	3.42748	1.77715	3.42748	up	0.0347521	-0.0373237	-1.77844	-1.77844	FGD5	FYVE, RhoGEF and PH domain containing 5	FALSE	Homo sapiens FYVE, RhoGEF and PH domain containing 5 (FGD5), mRNA [NM_152536]	152273	GO:0005515|GO:0005794|GO:0030036|GO:0031267|GO:0005783|GO:0008360|GO:0032587|GO:0001726|GO:0046872|GO:0030027|GO:0043088|GO:0043547|GO:0005085|GO:0005737|GO:0032321|GO:0007010|GO:0046847|GO:0005089|GO:0005856|GO:0005769	14975895	chr3	14975836	+	hs|3p25.1	NM_152536	chr3:14975836-14975895	NM_152536	Hs.412406
A_19_P00801597	2.35973	1.23862	2.35973	up	-1.19767	-0.756236	-2.21558	-2.21558	lnc-SNX10-2	lnc-SNX10-2:6	FALSE	Homo sapiens cDNA FLJ31922 fis, clone NT2RP7005219. [AK056484]			26537344	chr7	26537285	+	hs|7p15.2		chr7:26537285-26537344		Hs.587432
A_24_P884376	5.73849	2.52067	5.73849	up	-0.0320411	0.498051	-2.28767	-2.28767			FALSE				45854838	chr7	45854779	+	hs|7p12.3		chr7:45854779-45854838
A_21_P0014592	2.10517	1.07394	2.10517	up	0.0639761	0.416022	-0.833939	-0.833939	LOC101926887	uncharacterized LOC101926887	FALSE	PREDICTED: Homo sapiens uncharacterized LOC101926887 (LOC101926887), transcript variant X2, ncRNA [XR_424161]	101926887		91094607	chr10	91094548	-	hs|10q23.31	XR_424161	chr10:91094607-91094548	XR_424161
A_21_P0000057	4.00417	2.0015	4.00417	up	1.5432	1.67675	-0.391527	-0.391527	RGS9	regulator of G-protein signaling 9	FALSE	Homo sapiens regulator of G-protein signaling 9 (RGS9), transcript variant 3, mRNA [NM_001165933]	8787	GO:0043627|GO:0005886|GO:0007603|GO:0005834|GO:0038032|GO:0005634|GO:0022400|GO:0007212|GO:0032403|GO:0007399|GO:0043547|GO:0035556|GO:0005737|GO:0008277|GO:0004871|GO:0007601|GO:0005096|GO:0016056	63206607	chr17	63204068	+	hs|17q24.1	NM_001165933	chr17:63204068-63206607	NM_001165933	Hs.664380
A_33_P3263747	2.59296	1.3746	2.59296	up	0.0341039	-0.397451	-1.55628	-1.55628			FALSE
A_19_P00320274	2.22549	1.15413	2.22549	up	0.435739	0.428577	-0.721967	-0.721967	ZMIZ1-AS1	ZMIZ1 antisense RNA 1	FALSE	Homo sapiens ZMIZ1 antisense RNA 1 (ZMIZ1-AS1), transcript variant 1, long non-coding RNA [NR_024431]	283050		80703690	chr10	80703631	-	hs|10q22.3	NR_024431	chr10:80703690-80703631	NR_024431	Hs.309176
A_19_P00324582	4.66891	2.22309	4.66891	up	0.333825	-0.226115	-2.16923	-2.16923			FALSE				26215714	chr1	26215655	+	hs|1p36.11		chr1:026215655-026215714
A_33_P3366412	4.34893	2.12066	4.34893	up	-0.328557	-0.353041	-2.46146	-2.46146			FALSE				43608342	chr9	43608283	-	hs|9p11.2		chr9:043608342-043608283
A_33_P3354326	6.59593	2.72158	6.59593	up	1.61052	1.60488	-1.11388	-1.11388	lnc-SMARCAL1-4	lnc-SMARCAL1-4:1	FALSE	LNCipedia lincRNA (lnc-SMARCAL1-4), lincRNA [lnc-SMARCAL1-4:1]			217186451	chr2	217186392	+	hs|2q35		chr2:217186392-217186451
A_24_P194819	2.81069	1.49092	2.81069	up	0.00353646	-0.00353646	-1.49092	-1.49092			FALSE	Q6NVR7_XENTR (Q6NVR7) Protease, serine, 29, partial (15%) [THC2776688]			94949218	chr9	94949159	-	hs|9q22.31		chr9:094949218-094949159
A_21_P0013072	2.54028	1.34499	2.54028	up	-0.237029	-0.00190306	-1.46445	-1.46445	XLOC_l2_012925		FALSE	BROAD Institute lincRNA (XLOC_l2_012925), lincRNA [TCONS_l2_00024675]			27018431	chr6	26960361	-	hs|6p22.2		chr6:27018431-26960361
A_24_P926507	2.44898	1.29218	2.44898	up	0.94297	0.694755	-0.473319	-0.473319	SLC14A1	solute carrier family 14 (urea transporter), member 1 (Kidd blood group)	FALSE	Homo sapiens solute carrier family 14 (urea transporter), member 1 (Kidd blood group) (SLC14A1), transcript variant 4, mRNA [NM_001146037]	6563	GO:0016323|GO:0005886|GO:0005887|GO:0005372|GO:0015265|GO:0015204|GO:0006833|GO:0071918|GO:0055085|GO:0015840	43331985	chr18	43331926	+	hs|18q12.3	NM_001146037	chr18:43331926-43331985	NM_001146037	Hs.101307
A_21_P0011016	2.3045	1.20445	2.3045	up	0.385617	0.106422	-0.958435	-0.958435	LOC643733	caspase 4, apoptosis-related cysteine peptidase pseudogene	FALSE		643733		104777733	chr11	104776255	-	hs|11q22.3		chr11:104777733-104776255
A_33_P3233906	2.22361	1.1529	2.22361	up	0.720517	0.665213	-0.460039	-0.460039	RAMP1	receptor (G protein-coupled) activity modifying protein 1	FALSE	Homo sapiens receptor (G protein-coupled) activity modifying protein 1 (RAMP1), mRNA [NM_005855]	10267	GO:0004948|GO:0005515|GO:0005886|GO:0009986|GO:0030819|GO:0031716|GO:0001525|GO:0015031|GO:0015026|GO:0072659|GO:0005615|GO:0006886|GO:0043235|GO:0031623|GO:0008277|GO:0007186|GO:0005887|GO:0008565|GO:0004872|GO:0006816|GO:0060050	238820598	chr2	238820539	+	hs|2q37.3	NM_005855	chr2:238820539-238820598	NM_005855	Hs.471783
A_23_P21560	2.16376	1.11354	2.16376	up	0.832108	0.460733	-0.467119	-0.467119	FAM49A	family with sequence similarity 49, member A	FALSE	Homo sapiens family with sequence similarity 49, member A (FAM49A), mRNA [NM_030797]	81553	GO:0005622	16736356	chr2	16734228	-	hs|2p24.2	NM_030797	chr2:16736356-16734228	NM_030797	Hs.467769
A_21_P0010399	2.37219	1.24622	2.37219	up	0.330998	-0.00508833	-1.08326	-1.08326	lnc-RGL4-3	lnc-RGL4-3:1	FALSE	LNCipedia lincRNA (lnc-RGL4-3), lincRNA [lnc-RGL4-3:1]			23893712	chr22	23893653	+	hs|22q11.23		chr22:23893653-23893712
A_24_P288448	2.46578	1.30204	2.46578	up	0.50704	0.629747	-0.733651	-0.733651	RASSF2	Ras association (RalGDS/AF-6) domain family member 2	FALSE	Ras association (RalGDS/AF-6) domain family member 2 [Source:HGNC Symbol;Acc:HGNC:9883] [ENST00000478553]	9770	GO:0048872|GO:0005515|GO:0045667|GO:0007049|GO:0005737|GO:0001501|GO:0046849|GO:0001503|GO:0038168|GO:0005634|GO:0045670	4773654	chr20	4773229	-	hs|20p13	BC110385	chr20:4773654-4773229		Hs.631504
A_33_P3298092	7.25656	2.85929	7.25656	up	0.310769	0.371454	-2.51817	-2.51817	LOC100131756	uncharacterized LOC100131756	FALSE	Homo sapiens cDNA FLJ38820 fis, clone LIVER2008473. [AK096139]	100131756		43707287	chr1	43707228	-	hs|1p34.2	AK096139	chr1:43707287-43707228		Hs.650461
A_19_P00321692	2.47939	1.30999	2.47939	up	-0.241207	0.136133	-1.36252	-1.36252	LOC644838	uncharacterized LOC644838	FALSE		644838		67405075	chr2	67405016	-	hs|2p14		chr2:67405075-67405016
A_24_P666105	2.63489	1.39774	2.63489	up	0.810585	1.13192	-0.426487	-0.426487	LRRTM4	leucine rich repeat transmembrane neuronal 4	FALSE	Homo sapiens leucine rich repeat transmembrane neuronal 4 (LRRTM4), transcript variant 1, mRNA [NM_001134745]	80059	GO:0030054|GO:0097113|GO:0045211|GO:0032281|GO:0043395	76975006	chr2	76974947	-	hs|2p12	NM_001134745	chr2:76975006-76974947	NM_001134745	Hs.285782
A_33_P3420680	4.3408	2.11796	4.3408	up	-0.0220869	0.0220871	-2.11796	-2.11796	NEUROG1	neurogenin 1	FALSE	Homo sapiens neurogenin 1 (NEUROG1), mRNA [NM_006161]	4762	GO:0003700|GO:0042472|GO:0006357|GO:0031536|GO:0070888|GO:0005634|GO:0003677|GO:0000989|GO:0006351|GO:0007399|GO:0051091|GO:0045165|GO:0045666|GO:0045944|GO:0003682|GO:0030182|GO:0046983|GO:0043204	134870122	chr5	134870063	-	hs|5q31.1	NM_006161	chr5:134870122-134870063	NM_006161	Hs.248149
A_24_P49106	2.35414	1.2352	2.35414	up	-0.0836301	0.340709	-1.10666	-1.10666	TCEAL7	transcription elongation factor A (SII)-like 7	FALSE	Homo sapiens transcription elongation factor A (SII)-like 7 (TCEAL7), mRNA [NM_152278]	56849	GO:0032088|GO:0005634|GO:0045892|GO:0006351	102586332	chrX	102585937	+	hs|Xq22.1	NM_152278	chrX:102585937-102586332	NM_152278	Hs.21861
A_33_P3300877	2.14154	1.09865	2.14154	up	-0.0276709	-0.29492	-1.25994	-1.25994			FALSE				81012921	chr17	81012862	-	hs|17q25.3		chr17:081012921-081012862
A_24_P62783	2.70446	1.43534	2.70446	up	1.23612	1.06386	-0.285353	-0.285353	FABP3	fatty acid binding protein 3, muscle and heart	FALSE	Homo sapiens fatty acid binding protein 3, muscle and heart (FABP3), mRNA [NM_004102]	2170	GO:0005515|GO:0008092|GO:0042632|GO:0032868|GO:0008285|GO:0005324|GO:0042493|GO:0050543|GO:0046320|GO:0005615|GO:0005829|GO:0036041|GO:0016528|GO:0070542|GO:0071073|GO:0070538|GO:0006631|GO:0055091|GO:0044539|GO:0070062	31842266	chr1	31840317	-	hs|1p35.2	NM_004102	chr1:31842266-31840317	NM_004102	Hs.657242
A_33_P3331376	2.04849	1.03456	2.04849	up	0.591358	0.745928	-0.365918	-0.365918	EPHB2	EPH receptor B2	FALSE	Homo sapiens EPH receptor B2 (EPHB2), transcript variant 2, mRNA [NM_004442]	2048	GO:0005515|GO:0031290|GO:0030424|GO:0005886|GO:0071679|GO:0001655|GO:0048593|GO:0030425|GO:0005829|GO:0005005|GO:0007413|GO:0007411|GO:0043025|GO:0060021|GO:0060996|GO:0060997|GO:0007612|GO:0051965|GO:0042472|GO:0048013|GO:0005102|GO:0005576|GO:0018108|GO:0021952|GO:0001525|GO:0005524|GO:0007399|GO:0016310|GO:0022038|GO:0005887|GO:0050771|GO:0004713|GO:0008046|GO:0021631|GO:0050878|GO:0048170	23240363	chr1	23240304	+	hs|1p36.12	NM_004442	chr1:23240304-23240363	NM_004442	Hs.523329
A_21_P0003674	3.60518	1.85007	3.60518	up	-0.192361	-0.0600097	-1.97626	-1.97626	lnc-CLCN3-1	lnc-CLCN3-1:2	FALSE	LNCipedia lincRNA (lnc-CLCN3-1), lincRNA [lnc-CLCN3-1:2]			170861763	chr4	170861704	+	hs|4q33		chr4:170861704-170861763
A_21_P0002496	2.58142	1.36817	2.58142	up	0.00319719	0.446268	-1.14343	-1.14343	lnc-CCDC93-3	lnc-CCDC93-3:1	FALSE	LNCipedia lincRNA (lnc-CCDC93-3), lincRNA [lnc-CCDC93-3:1]			118967047	chr2	118966988	-	hs|2q14.2		chr2:118967047-118966988
A_33_P3242064	2.48381	1.31256	2.48381	up	-0.128388	-0.337585	-1.54554	-1.54554	OR5J2	olfactory receptor, family 5, subfamily J, member 2	FALSE	Homo sapiens olfactory receptor, family 5, subfamily J, member 2 (OR5J2), mRNA [NM_001005492]	282775	GO:0050911|GO:0004984|GO:0007186|GO:0005886|GO:0004930|GO:0016021	55945032	chr11	55944973	+	hs|11q12.1	NM_001005492	chr11:55944973-55945032	NM_001005492	Hs.537145
A_23_P434289	2.00354	1.00255	2.00354	up	0.49324	0.510057	-0.500902	-0.500902	GPR62	G protein-coupled receptor 62	FALSE	Homo sapiens G protein-coupled receptor 62 (GPR62), mRNA [NM_080865]	118442	GO:0043235|GO:0008150|GO:0007186|GO:0005886|GO:0004930|GO:0016021|GO:0005575	51991460	chr3	51991401	+	hs|3p21.2	NM_080865	chr3:51991401-51991460	NM_080865	Hs.232213
A_21_P0007437	2.10862	1.0763	2.10862	up	-0.117517	-0.347694	-1.3089	-1.3089	LOC101927495	uncharacterized LOC101927495	FALSE	Homo sapiens uncharacterized LOC101927495 (LOC101927495), long non-coding RNA [NR_110189]	101927495		61373457	chr11	61373398	+	hs|11q12.2	NR_110189	chr11:61373398-61373457	NR_110189	Hs.553866
A_21_P0010066	2.13562	1.09466	2.13562	up	0.0638943	-0.193147	-1.15928	-1.15928	lnc-ANKRD60-1	lnc-ANKRD60-1:1	FALSE	LNCipedia lincRNA (lnc-ANKRD60-1), lincRNA [lnc-ANKRD60-1:1]			56739245	chr20	56739186	-	hs|20q13.32		chr20:56739245-56739186
A_21_P0011521	2.5243	1.33589	2.5243	up	0.278813	-0.0194416	-1.2062	-1.2062	XLOC_l2_005692		FALSE	BROAD Institute lincRNA (XLOC_l2_005692), lincRNA [TCONS_l2_00010602]			19497818	chr17	19497759	+	hs|17p11.2		chr17:19497759-19497818
A_23_P141624	4.5257	2.17814	4.5257	up	1.34992	1.05037	-0.977995	-0.977995	KRTAP1-1	keratin associated protein 1-1	FALSE	Homo sapiens keratin associated protein 1-1 (KRTAP1-1), mRNA [NM_030967]	81851	GO:0008150|GO:0045095	39196937	chr17	39196878	-	hs|17q21.2	NM_030967	chr17:39196937-39196878	NM_030967	Hs.247934
A_21_P0011952	2.41658	1.27297	2.41658	up	0.884962	0.913441	-0.373766	-0.373766	LOC101927260	uncharacterized LOC101927260	FALSE	PREDICTED: Homo sapiens uncharacterized LOC101927260 (LOC101927260), ncRNA [XR_244828]	101927260		112004696	chr2	112004637	-	hs|2q13	XR_244828	chr2:112004696-112004637	XR_244828
A_23_P66798	3.44839	1.78592	3.44839	up	1.46385	1.34172	-0.383141	-0.383141	KRT19	keratin 19, type I	FALSE	Homo sapiens keratin 19, type I (KRT19), mRNA [NM_002276]	3880	GO:0005515|GO:0005882|GO:0030018|GO:0043627|GO:0060706|GO:0045214|GO:0032403|GO:0071944|GO:0042383|GO:0016010|GO:0005200|GO:0043034|GO:0016032|GO:0008307|GO:0070062	39679977	chr17	39679918	-	hs|17q21.2	NM_002276	chr17:39679977-39679918	NM_002276	Hs.654568
A_21_P0002489	5.1632	2.36826	5.1632	up	-0.127751	0.127751	-2.36826	-2.36826	lnc-EDAR-1	lnc-EDAR-1:1	FALSE	LNCipedia lincRNA (lnc-EDAR-1), lincRNA [lnc-EDAR-1:1]			109685058	chr2	109684999	-	hs|2q12.3		chr2:109685058-109684999
A_33_P3378126	2.08654	1.06111	2.08654	up	1.57446	1.40355	0.427897	0.427897	FBXO32	F-box protein 32	FALSE	Homo sapiens F-box protein 32 (FBXO32), transcript variant 1, mRNA [NM_058229]	114907	GO:0005515|GO:0030018|GO:0016567|GO:0005730|GO:0014894|GO:0071549	124515447	chr8	124515388	-	hs|8q24.13	NM_058229	chr8:124515447-124515388	NM_058229	Hs.403933
A_21_P0007787	2.52691	1.33737	2.52691	up	0.51724	0.460544	-0.848482	-0.848482	LINC00944	long intergenic non-protein coding RNA 944	FALSE	Homo sapiens long intergenic non-protein coding RNA 944 (LINC00944), long non-coding RNA [NR_033878]	387895		127215304	chr12	127215247	-	hs|12q24.32	NR_033878	chr12:127215304-127215247	NR_033878	Hs.534660
A_21_P0000392	2.24915	1.16938	2.24915	up	0.863342	0.744427	-0.365495	-0.365495	SNORD98	small nucleolar RNA, C/D box 98	FALSE	Homo sapiens small nucleolar RNA, C/D box 98 (SNORD98), small nucleolar RNA [NR_003076]	692211		70514995	chr10	70514936	+	hs|10q21.3	NR_003076	chr10:70514936-70514995	NR_003076
A_21_P0000238	2.33466	1.22321	2.33466	up	0.133063	0.0639896	-1.12468	-1.12468	SNORD12C	small nucleolar RNA, C/D box 12C	FALSE	Homo sapiens small nucleolar RNA, C/D box 12C (SNORD12C), small nucleolar RNA [NR_002433]	26765		47895560	chr20	47895501	+	hs|20q13.13	NR_002433	chr20:47895501-47895560	NR_002433	Hs.722986
A_33_P3301221	3.33338	1.73698	3.33338	up	0.594401	0.41127	-1.23415	-1.23415	MORN1	MORN repeat containing 1	FALSE	Homo sapiens MORN repeat containing 1 (MORN1), transcript variant 3, non-coding RNA [NR_125361]	79906		2306367	chr1	2306308	-	hs|1p36.32	NR_125361	chr1:2306367-2306308	NR_125361	Hs.642701
A_23_P38830	3.08439	1.62499	3.08439	up	1.54033	1.44431	-0.132667	-0.132667	ZNF552	zinc finger protein 552	FALSE	Homo sapiens zinc finger protein 552 (ZNF552), mRNA [NM_024762]	79818	GO:0006355|GO:0005634|GO:0003677|GO:0046872|GO:0006351	58319290	chr19	58319231	-	hs|19q13.43	NM_024762	chr19:58319290-58319231	NM_024762	Hs.560727
A_21_P0001225	3.70629	1.88998	3.70629	up	1.6575	1.63356	-0.244443	-0.244443			FALSE	ALU8_HUMAN (P39195) Alu subfamily SX sequence contamination warning entry, partial (7%) [THC2773498]			222054458	chr1	222054399	-	hs|1q41		chr1:222054458-222054399
A_33_P3282230	5.75546	2.52493	5.75546	up	1.73939	2.28927	-0.510601	-0.510601	IZUMO3	IZUMO family member 3	FALSE	Homo sapiens IZUMO family member 3 (IZUMO3), mRNA [NM_001271706]	100129669	GO:0005886|GO:0016021|GO:0042803	24543346	chr9	24543287	-	hs|9p21.3		chr9:24543346-24543287	NM_001271706	Hs.573530
A_24_P462899	2.43246	1.28242	2.43246	up	0.418932	0.291614	-0.927145	-0.927145	CENPW	centromere protein W	FALSE	Homo sapiens centromere protein W (CENPW), transcript variant 2, mRNA [NM_001012507]	387103	GO:0005515|GO:0051276|GO:0046982|GO:0005730|GO:0006334|GO:0003677|GO:0016363|GO:0034080|GO:0007067|GO:0051382|GO:0007059|GO:0000777|GO:0000776|GO:0005654|GO:0000278|GO:0000775|GO:0051301	126669682	chr6	126669623	+	hs|6q22.32	NM_001012507	chr6:126669623-126669682	NM_001012507	Hs.486401
A_21_P0007261	2.24923	1.16943	2.24923	up	1.02212	1.16298	-0.0768824	-0.0768824	lnc-RP11-201M22.1.1-3	lnc-RP11-201M22.1.1-3:1	FALSE	LNCipedia lincRNA (lnc-RP11-201M22.1.1-3), lincRNA [lnc-RP11-201M22.1.1-3:1]			91605570	chr11	91605511	+	hs|11q14.3		chr11:91605511-91605570
A_33_P3290707	2.27622	1.18664	2.27622	up	0.981721	0.707947	-0.341803	-0.341803	MME	membrane metallo-endopeptidase	FALSE	Homo sapiens membrane metallo-endopeptidase (MME), transcript variant 2b, mRNA [NM_007289]	4311	GO:0005515|GO:0030424|GO:0005886|GO:0002003|GO:0045202|GO:0030425|GO:0005737|GO:0006508|GO:0070062|GO:0042277|GO:0044306|GO:0001822|GO:0071492|GO:0071493|GO:0046449|GO:0019233|GO:0050435|GO:0008021|GO:0005903|GO:0004175|GO:0071345|GO:0005887|GO:0008270|GO:0016021|GO:0090399|GO:0004222|GO:0005925|GO:0044267|GO:0006518|GO:0008238	154802115	chr3	154802056	+	hs|3q25.2	NM_007289	chr3:154802056-154802115	NM_007289	Hs.307734
A_33_P3414880	2.2065	1.14176	2.2065	up	0.702211	0.712287	-0.434508	-0.434508	LOC339192	uncharacterized LOC339192	FALSE	PREDICTED: Homo sapiens uncharacterized LOC339192 (LOC339192), transcript variant X3, ncRNA [XR_424829]	339192		43296741	chr17	43296682	-	hs|17q21.31	XR_424829	chr17:43296741-43296682	XR_424829
A_23_P144326	2.17017	1.11781	2.17017	up	1.05876	0.985702	-0.0955768	-0.0955768	ASB5	ankyrin repeat and SOCS box containing 5	FALSE	Homo sapiens ankyrin repeat and SOCS box containing 5 (ASB5), mRNA [NM_080874]	140458	GO:0035556|GO:0016567	177135110	chr4	177135051	-	hs|4q34.2	NM_080874	chr4:177135110-177135051	NM_080874	Hs.591712
A_23_P209735	2.29079	1.19585	2.29079	up	1.37369	1.8081	0.395048	0.395048	ARMC9	armadillo repeat containing 9	FALSE	Homo sapiens armadillo repeat containing 9 (ARMC9), transcript variant 2, mRNA [NM_025139]	80210	GO:0070062	232160928	chr2	232156115	+	hs|2q37.1	NM_025139	chr2:232156115-232160928	NM_025139	Hs.471610
A_33_P3317613	6.46247	2.69209	6.46247	up	0.833558	0.190206	-2.1802	-2.1802	SYN2	synapsin II	FALSE	Homo sapiens synapsin II (SYN2), transcript variant IIa, mRNA [NM_133625]	6854	GO:0030054|GO:0008152|GO:0045202|GO:0007268|GO:0030672|GO:0003824|GO:0005524|GO:0007269	12232907	chr3	12232848	+	hs|3p25.2	NM_133625	chr3:12232848-12232907	NM_133625	Hs.445503
A_23_P421306	7.08128	2.82401	7.08128	up	2.4196	2.22797	-0.500227	-0.500227	SYT12	synaptotagmin XII	FALSE	Homo sapiens synaptotagmin XII (SYT12), transcript variant 1, mRNA [NM_177963]	91683	GO:0030054|GO:0030672|GO:0016021	66818278	chr11	66818219	+	hs|11q13.2	NM_177963	chr11:66818219-66818278	NM_177963	Hs.287636
A_23_P203183	3.67359	1.87719	3.67359	up	1.97593	2.01432	0.117933	0.117933	APOC3	apolipoprotein C-III	FALSE	Homo sapiens apolipoprotein C-III (APOC3), mRNA [NM_000040]	345	GO:0050995|GO:0007603|GO:0042627|GO:0070328|GO:0043434|GO:0010897|GO:0044281|GO:0010903|GO:0034379|GO:0005615|GO:0034361|GO:0042953|GO:0006954|GO:0005543|GO:0034382|GO:0010987|GO:0015485|GO:0034363|GO:0070653|GO:0030234|GO:0010989|GO:0019433|GO:0071333|GO:0060621|GO:0055102|GO:0070062|GO:0008203|GO:0042632|GO:0032489|GO:0033344|GO:0007584|GO:0042493|GO:0043691|GO:0045717|GO:0034366|GO:0005576|GO:…	116703589	chr11	116703530	+	hs|11q23.3	NM_000040	chr11:116703530-116703589	NM_000040	Hs.73849
A_23_P146134	5.16595	2.36903	5.16595	up	0.878307	0.485499	-1.68713	-1.68713	DUSP26	dual specificity phosphatase 26 (putative)	FALSE	Homo sapiens dual specificity phosphatase 26 (putative) (DUSP26), mRNA [NM_024025]	78986	GO:0005515|GO:0001102|GO:0005794|GO:0005634|GO:0000122|GO:0035335|GO:0004647|GO:0045785|GO:0005739|GO:0002039|GO:0005737|GO:0006470|GO:0044387|GO:0070373|GO:0004721|GO:0008138|GO:0004725|GO:0070062	33448945	chr8	33448886	-	hs|8p12	NM_024025	chr8:33448945-33448886	NM_024025	Hs.8719
A_33_P3281695	2.16615	1.11513	2.16615	up	1.08553	1.14474	0	0	NLRP3	NLR family, pyrin domain containing 3	FALSE	Homo sapiens NLR family, pyrin domain containing 3 (NLRP3), transcript variant 6, mRNA [NM_001243133]	114548	GO:0005515|GO:0042347|GO:0050713|GO:0051259|GO:0035872|GO:0005829|GO:0051607|GO:0005737|GO:0006954|GO:0051092|GO:0050718|GO:0009595|GO:0032621|GO:0072559|GO:0050701|GO:0006919|GO:0042834|GO:0006915|GO:0032088|GO:0006952|GO:0002674|GO:0005524|GO:0043280|GO:0007165|GO:0071222|GO:0044546|GO:0045087|GO:0050728|GO:0032611	247611806	chr1	247611747	+	hs|1q44	NM_001243133	chr1:247611747-247611806	NM_001243133	Hs.159483
A_23_P17345	2.62639	1.39308	2.62639	up	1.07389	0.923085	-0.394593	-0.394593	MAFB	v-maf avian musculoaponeurotic fibrosarcoma oncogene homolog B	FALSE	Homo sapiens v-maf avian musculoaponeurotic fibrosarcoma oncogene homolog B (MAFB), mRNA [NM_005461]	9935	GO:0005515|GO:0005667|GO:0033077|GO:0042472|GO:0003700|GO:0007379|GO:0007585|GO:0048538|GO:0005634|GO:0006351|GO:0043565|GO:0007423|GO:0021572|GO:0021571|GO:0045647|GO:0045944|GO:0035284|GO:0008134	39314869	chr20	39314810	-	hs|20q12	NM_005461	chr20:39314869-39314810	NM_005461	Hs.169487
A_23_P16694	5.44262	2.4443	5.44262	up	1.94773	1.3449	-0.797987	-0.797987	CPS1-IT1	CPS1 intronic transcript 1 (non-protein coding)	FALSE	Homo sapiens CPS1 intronic transcript 1 (non-protein coding) (CPS1-IT1), long non-coding RNA [NR_002763]	29034		211483898	chr2	211483839	+	hs|2q34	NR_002763	chr2:211483839-211483898	NR_002763	Hs.658398
A_33_P3231156	2.88862	1.53038	2.88862	up	0.610054	0.39755	-1.02658	-1.02658			FALSE	metallothionein 1C, pseudogene [Source:HGNC Symbol;Acc:HGNC:7395] [ENST00000567054]			56682802	chr16	56682743	+	hs|16q12.2		chr16:56682743-56682802
A_19_P00809614	2.44227	1.28822	2.44227	up	0.232839	0.100616	-1.1215	-1.1215	MALAT1	metastasis associated lung adenocarcinoma transcript 1 (non-protein coding)	FALSE	Homo sapiens metastasis associated lung adenocarcinoma transcript 1 (non-protein coding) (MALAT1), long non-coding RNA [NR_002819]	378938		65273870	chr11	65273811	+	hs|11q13.1	NR_002819	chr11:65273811-65273870	NR_002819	Hs.621695
A_21_P0011355	2.44936	1.2924	2.44936	up	0.851142	0.519325	-0.607169	-0.607169	GOLGA8K	golgin A8 family, member K	FALSE	Homo sapiens golgin A8 family, member K (GOLGA8K), mRNA [NM_001282493]	653125	GO:0005794	32689486	chr15	32689427	-	hs|15q13.3	NM_001282493	chr15:32689486-32689427	NM_001282493	Hs.727141
A_21_P0006730	3.03886	1.60353	3.03886	up	1.11123	1.26408	-0.415876	-0.415876			FALSE	UI-HF-ES0-awe-d-14-0-UI.r1 NIH_MGC_213 Homo sapiens cDNA clone IMAGE:30561781 5', mRNA sequence [CF130727]			5637016	chr10	5636957	-	hs|10p15.1		chr10:5637016-5636957		Hs.460282
A_33_P3302373	2.51599	1.33113	2.51599	up	0.0126121	-0.289633	-1.46964	-1.46964	SZT2	seizure threshold 2 homolog (mouse)	FALSE	Homo sapiens seizure threshold 2 homolog (mouse) (SZT2), mRNA [NM_015284]	23334	GO:0003674|GO:0021540|GO:0043473|GO:0009791|GO:0007417|GO:0070062|GO:0005777	43918304	chr1	43918245	+	hs|1p34.2	NM_015284	chr1:43918245-43918304	NM_015284	Hs.643560
A_23_P48740	2.2999	1.20157	2.2999	up	1.25916	1.10921	-0.0173829	-0.0173829	DIO2	deiodinase, iodothyronine, type II	FALSE	Homo sapiens deiodinase, iodothyronine, type II (DIO2), transcript variant 1, mRNA [NM_013989]	1734	GO:0005886|GO:0004800|GO:0044281|GO:0034641|GO:0042403|GO:0008430|GO:0016020|GO:0001514|GO:0042446|GO:0006590|GO:0016021|GO:0031625|GO:0055114	80664399	chr14	80664340	-	hs|14q31.1	NM_013989	chr14:80664399-80664340	NM_013989	Hs.202354
A_23_P44724	4.30149	2.10484	4.30149	up	1.47873	1.36229	-0.684328	-0.684328	CSRP2	cysteine and glycine-rich protein 2	FALSE	Homo sapiens cysteine and glycine-rich protein 2 (CSRP2), transcript variant 1, mRNA [NM_001321]	1466	GO:0003674|GO:0008270|GO:0007275|GO:0005634|GO:0005925|GO:0030154	77252613	chr12	77252554	-	hs|12q21.2	NM_001321	chr12:77252613-77252554	NM_001321	Hs.530904
A_19_P00321734	2.24146	1.16444	2.24146	up	0.350524	0.165946	-0.906207	-0.906207	LINC00881	long intergenic non-protein coding RNA 881	FALSE	long intergenic non-protein coding RNA 881 [Source:HGNC Symbol;Acc:HGNC:48567] [ENST00000474477]	100498859		156817859	chr3	156817800	+	hs|3q25.31		chr3:156817800-156817859
A_33_P3291459	5.0753	2.34349	5.0753	up	-0.0906649	-0.758156	-2.7679	-2.7679	LOC100507547	uncharacterized LOC100507547	FALSE	Homo sapiens uncharacterized LOC100507547 (LOC100507547), transcript variant 1, long non-coding RNA [NR_037169]	100507547		32120638	chr6	32120579	-	hs|6p21.32	NR_037169	chr6:32120638-32120579	NR_037169	Hs.549204
A_23_P66881	3.16736	1.66328	3.16736	up	1.51577	1.47179	-0.169498	-0.169498	RGS9	regulator of G-protein signaling 9	FALSE	Homo sapiens regulator of G-protein signaling 9 (RGS9), transcript variant 1, mRNA [NM_003835]	8787	GO:0043627|GO:0005886|GO:0007603|GO:0005834|GO:0038032|GO:0005634|GO:0022400|GO:0007212|GO:0032403|GO:0007399|GO:0043547|GO:0035556|GO:0005737|GO:0008277|GO:0004871|GO:0007601|GO:0005096|GO:0016056	63223659	chr17	63223600	+	hs|17q24.1	NM_003835	chr17:63223600-63223659	NM_003835	Hs.664380
A_21_P0006089	2.70178	1.43391	2.70178	up	-0.0205696	0.0205698	-1.43391	-1.43391			FALSE				93727608	chr9	93727549	-	hs|9q22.2		chr9:93727608-93727549
A_33_P3373970	3.99763	1.99914	3.99763	up	-0.691318	-0.0290089	-2.35931	-2.35931			FALSE
A_23_P217297	3.12538	1.64403	3.12538	up	-0.103565	-0.102914	-1.74727	-1.74727	ZNF711	zinc finger protein 711	FALSE	Homo sapiens zinc finger protein 711 (ZNF711), mRNA [NM_021998]	7552	GO:0043565|GO:0005515|GO:0005634|GO:0045893|GO:0046872|GO:0006351|GO:0070062	84527301	chrX	84527242	+	hs|Xq21.1	NM_021998	chrX:84527242-84527301	NM_021998	Hs.326801
A_21_P0013108	2.27601	1.18651	2.27601	up	0.430565	0.163765	-0.88934	-0.88934	lnc-SHPRH-2	lnc-SHPRH-2:8	FALSE	LNCipedia lincRNA (lnc-SHPRH-2), lincRNA [lnc-SHPRH-2:8]			147171387	chr6	147171328	-	hs|6q24.3		chr6:147171387-147171328
A_21_P0010339	3.02471	1.59679	3.02471	up	-0.312499	0.032093	-1.737	-1.737			FALSE	DB069106 TESTI4 Homo sapiens cDNA clone TESTI4011248 5', mRNA sequence [DB069106]			17097923	chr22	17097864	+	hs|22q11.1		chr22:17097864-17097923		Hs.691526
A_33_P3386297	2.26781	1.1813	2.26781	up	0.174592	-0.0113471	-1.09968	-1.09968			FALSE	Homo sapiens MSTP159 (MST159) mRNA, complete cds. [AF190162]			135240297	chrX	135240238	+	hs|Xq26.3	AF190162	chrX:135240238-135240297		Hs.689084
A_33_P3415113	2.56697	1.36007	2.56697	up	0.398098	0.393152	-0.964441	-0.964441	CLCN6	chloride channel, voltage-sensitive 6	FALSE	Homo sapiens chloride channel, voltage-sensitive 6 (CLCN6), transcript variant 1, mRNA [NM_001286]	1185	GO:0006821|GO:0005247|GO:0005765|GO:0005524|GO:0055085|GO:0006884|GO:0009612|GO:0007165|GO:0044070|GO:0015297|GO:0034220|GO:0016021|GO:0010008	11888275	chr1	11888216	+	hs|1p36.22	NM_001286	chr1:11888216-11888275	NM_001286	Hs.193043
A_33_P3337549	2.02143	1.01538	2.02143	up	1.05991	0.85399	-0.0584288	-0.0584288	ABCB5	ATP-binding cassette, sub-family B (MDR/TAP), member 5	FALSE	Homo sapiens ATP-binding cassette, sub-family B (MDR/TAP), member 5 (ABCB5), transcript variant 3, mRNA [NM_001163942]	340273	GO:0002481|GO:0005886|GO:0015562|GO:0002485|GO:0042626|GO:0055085|GO:0002591|GO:0005524|GO:0030154|GO:0005887|GO:0008152|GO:0042391|GO:0002489|GO:0048058	20699735	chr7	20699676	+	hs|7p21.1	NM_001163942	chr7:20699676-20699735	NM_001163942	Hs.404102
A_19_P00322859	2.45325	1.29469	2.45325	up	-0.131521	-0.539158	-1.63003	-1.63003	lnc-GLB1L2-1	lnc-GLB1L2-1:11	FALSE	LNCipedia lincRNA (lnc-GLB1L2-1), lincRNA [lnc-GLB1L2-1:11]			134372969	chr11	134372910	+	hs|11q25		chr11:134372910-134372969
A_23_P403488	2.76978	1.46977	2.76978	up	0.873929	0.669708	-0.697955	-0.697955	NLRP10	NLR family, pyrin domain containing 10	FALSE	Homo sapiens NLR family, pyrin domain containing 10 (NLRP10), mRNA [NM_176821]	338322	GO:2000318|GO:0050829|GO:0005737|GO:2000778|GO:0045087|GO:0002827|GO:0050832|GO:0035397|GO:0005524|GO:2000484|GO:0019897	7981537	chr11	7981478	-	hs|11p15.4	NM_176821	chr11:7981537-7981478	NM_176821	Hs.449636
A_23_P39955	2.04499	1.03209	2.04499	up	1.72473	1.4416	0.551071	0.551071	ACTG2	actin, gamma 2, smooth muscle, enteric	FALSE	Homo sapiens actin, gamma 2, smooth muscle, enteric (ACTG2), transcript variant 1, mRNA [NM_001615]	72	GO:0006936|GO:0072562|GO:0005856|GO:0005615|GO:0005524|GO:0071944|GO:0070062|GO:0005829	74146759	chr2	74146700	+	hs|2p13.1	NM_001615	chr2:74146700-74146759	NM_001615	Hs.516105
A_23_P358917	2.63276	1.39658	2.63276	up	-0.340337	0.109279	-1.5121	-1.5121	CYP3A7	cytochrome P450, family 3, subfamily A, polypeptide 7	FALSE	Homo sapiens cytochrome P450, family 3, subfamily A, polypeptide 7 (CYP3A7), mRNA [NM_000765]	1551	GO:0004497|GO:0006805|GO:0070330|GO:0019825|GO:0005506|GO:0005789|GO:0044281|GO:0055114|GO:0020037	99303096	chr7	99303037	-	hs|7q22.1	NM_000765	chr7:99303096-99303037	NM_000765	Hs.111944
A_33_P3449097	2.16933	1.11725	2.16933	up	0.67524	0.547188	-0.506037	-0.506037	TSPAN10	tetraspanin 10	FALSE	Homo sapiens tetraspanin 10 (TSPAN10), transcript variant 1, mRNA [NM_001290212]	83882	GO:0072594|GO:0016021|GO:0019899	79615778	chr17	79615719	+	hs|17q25.3	NM_001290212	chr17:79615719-79615778	NM_001290212	Hs.740811
A_33_P3211666	2.12629	1.08834	2.12629	up	1.15885	1.06904	0.0256097	0.0256097	IL18R1	interleukin 18 receptor 1	FALSE	Homo sapiens interleukin 18 receptor 1 (IL18R1), transcript variant 1, mRNA [NM_003855]	8809	GO:0005515|GO:0032729|GO:0042346|GO:0005886|GO:0042008|GO:0007165|GO:0006955|GO:0030101|GO:0045063|GO:0004908|GO:0004872|GO:0016021|GO:0035655	102984527	chr2	102984468	+	hs|2q12.1	NM_003855	chr2:102984468-102984527	NM_003855	Hs.469521
A_33_P3306843	3.20109	1.67856	3.20109	up	1.03665	0.612417	-0.854027	-0.854027	ZNF836	zinc finger protein 836	FALSE	Homo sapiens zinc finger protein 836 (ZNF836), mRNA [NM_001102657]	162962	GO:0006355|GO:0003700|GO:0005634|GO:0003677|GO:0046872|GO:0006351	52658189	chr19	52658130	-	hs|19q13.41	NM_001102657	chr19:52658189-52658130	NM_001102657	Hs.631584
A_23_P320261	5.82141	2.54137	5.82141	up	2.34327	2.23365	-0.252909	-0.252909	DMKN	dermokine	FALSE	Homo sapiens dermokine (DMKN), transcript variant 1, mRNA [NM_001035516]	93099	GO:0005515|GO:0005615|GO:0070062	35988194	chr19	35988135	-	hs|19q13.12	NM_001035516	chr19:35988194-35988135	NM_001035516	Hs.417795
A_33_P3303309	2.15598	1.10834	2.15598	up	-0.427842	-0.70364	-1.67408	-1.67408	LINC01105	long intergenic non-protein coding RNA 1105	FALSE	Homo sapiens long intergenic non-protein coding RNA 1105 (LINC01105), long non-coding RNA [NR_026832]	150622		6112581	chr2	6112522	+	hs|2p25.2	NR_026832	chr2:6112522-6112581	NR_026832	Hs.560891
A_21_P0007321	2.029	1.02077	2.029	up	1.1556	0.885937	0	0	lnc-SOX6-1	lnc-SOX6-1:1	FALSE	LNCipedia lincRNA (lnc-SOX6-1), lincRNA [lnc-SOX6-1:1]			15932586	chr11	15932527	-	hs|11p15.2		chr11:15932586-15932527
A_33_P3229918	5.41858	2.43792	5.41858	up	0.873155	0.424641	-1.78902	-1.78902	PTCRA	pre T-cell antigen receptor alpha	FALSE	Homo sapiens pre T-cell antigen receptor alpha (PTCRA), transcript variant 1, mRNA [NM_001243168]	171558	GO:0005515|GO:0016021	42893573	chr6	42893514	+	hs|6p21.1	NM_001243168	chr6:42893514-42893573	NM_001243168	Hs.169002
A_32_P189781	3.06048	1.61376	3.06048	up	1.41834	1.18562	-0.311774	-0.311774	LINC00520	long intergenic non-protein coding RNA 520	FALSE	Homo sapiens long intergenic non-protein coding RNA 520 (LINC00520), transcript variant 1, long non-coding RNA [NR_026796]	645687		56247937	chr14	56247878	-	hs|14q22.3	NR_026796	chr14:56247937-56247878	NR_026796	Hs.569345
A_21_P0002934	3.23165	1.69227	3.23165	up	-0.213934	0.213934	-1.69227	-1.69227	lnc-OXNAD1-2	lnc-OXNAD1-2:2	FALSE	LNCipedia lincRNA (lnc-OXNAD1-2), lincRNA [lnc-OXNAD1-2:2]			16581074	chr3	16581015	+	hs|3p24.3		chr3:16581015-16581074
A_33_P3251283	2.39426	1.25958	2.39426	up	0.417484	0.422853	-0.839413	-0.839413	CTAGE4	CTAGE family, member 4	FALSE	Homo sapiens CTAGE family, member 4 (CTAGE4), mRNA [NM_198495]	100128553	GO:0008150|GO:0016021|GO:0005575	143882618	chr7	143882559	+	hs|7q35	NM_198495	chr7:143882559-143882618	NM_198495	Hs.720693
A_32_P71571	2.69834	1.43207	2.69834	up	-0.830736	-0.360586	-2.02773	-2.02773	FAM19A4	family with sequence similarity 19 (chemokine (C-C motif)-like), member A4	FALSE	Homo sapiens family with sequence similarity 19 (chemokine (C-C motif)-like), member A4 (FAM19A4), transcript variant 1, mRNA [NM_182522]	151647	GO:0042391|GO:0005576|GO:0051930	68781029	chr3	68780970	-	hs|3p14.1	NM_182522	chr3:68781029-68780970	NM_182522	Hs.187873
A_33_P3270863	2.44318	1.28876	2.44318	up	1.03264	0.864275	-0.340306	-0.340306	XDH	xanthine dehydrogenase	FALSE	Homo sapiens xanthine dehydrogenase (XDH), mRNA [NM_000379]	7498	GO:0051898|GO:2001213|GO:0008762|GO:0050660|GO:0044281|GO:0005615|GO:0042803|GO:0005829|GO:0006195|GO:1900745|GO:0005777|GO:0016903|GO:0005506|GO:0006919|GO:0004854|GO:0051537|GO:0004855|GO:0009055|GO:0055086|GO:1900747|GO:0043546|GO:0007595|GO:0006144|GO:0001937|GO:0010629|GO:0009115|GO:0001933|GO:2000379|GO:0045602|GO:0055114	31557247	chr2	31557188	-	hs|2p23.1	NM_000379	chr2:31557247-31557188	NM_000379	Hs.250
A_33_P3336262	2.33241	1.22182	2.33241	up	0.0718944	-0.0961497	-1.23395	-1.23395	CFAP74	cilia and flagella associated protein 74	FALSE	cilia and flagella associated protein 74 [Source:HGNC Symbol;Acc:HGNC:29368] [ENST00000412120]	85452	GO:0035082|GO:0005930	1853767	chr1	1853708	-	hs|1p36.33	XM_006710997	chr1:1853767-1853708	XM_006710997	Hs.259619
A_23_P131060	3.07645	1.62127	3.07645	up	0.724726	0.25509	-1.13136	-1.13136	CYP4F8	cytochrome P450, family 4, subfamily F, polypeptide 8	FALSE	Homo sapiens cytochrome P450, family 4, subfamily F, polypeptide 8 (CYP4F8), mRNA [NM_007253]	11283	GO:0006805|GO:0006693|GO:0070330|GO:0005506|GO:0018685|GO:0005789|GO:0044281|GO:0016021|GO:0006690|GO:0055114|GO:0020037	15740029	chr19	15739621	+	hs|19p13.12	NM_007253	chr19:15739621-15740029	NM_007253	Hs.268554
A_21_P0008601	2.45002	1.29279	2.45002	up	-0.0486817	0.404704	-1.11478	-1.11478			FALSE				26122343	chr15	26122284	+	hs|15q12		chr15:26122284-26122343
A_33_P3221034	2.1046	1.07355	2.1046	up	0.614174	0.228887	-0.652019	-0.652019	SMIM17	small integral membrane protein 17	FALSE	Homo sapiens small integral membrane protein 17 (SMIM17), mRNA [NM_001193628]	147670	GO:0016021	57168614	chr19	57168555	+	hs|19q13.43	NM_001193628	chr19:57168555-57168614	NM_001193628	Hs.336588
A_23_P206280	3.57129	1.83645	3.57129	up	1.5671	1.22435	-0.440722	-0.440722	GPR56	G protein-coupled receptor 56	FALSE	Homo sapiens G protein-coupled receptor 56 (GPR56), transcript variant 3, mRNA [NM_201525]	9289	GO:0008285|GO:2001223|GO:0004930|GO:0035025|GO:0005518|GO:0050840|GO:0007267|GO:0021801|GO:0001525|GO:0007266|GO:0021819|GO:0070528|GO:0045785|GO:0010573|GO:0007186|GO:0005887|GO:0007420|GO:0016021|GO:0007155|GO:0070062	57698835	chr16	57698776	+	hs|16q21	NM_201525	chr16:57698776-57698835	NM_201525	Hs.513633
A_24_P18802	2.03814	1.02725	2.03814	up	1.08015	0.778804	-0.0977736	-0.0977736	VPS18	vacuolar protein sorting 18 homolog (S. cerevisiae)	FALSE	Homo sapiens vacuolar protein sorting 18 homolog (S. cerevisiae) (VPS18), mRNA [NM_020857]	57617	GO:0005515|GO:0019905|GO:0030897|GO:0005770|GO:0005884|GO:0035542|GO:0003779|GO:0046718|GO:0005765|GO:0005764|GO:0006886|GO:0046872|GO:0006904|GO:0031902|GO:0007032|GO:0030674|GO:0007040|GO:0005769|GO:0005768	41195945	chr15	41195886	+	hs|15q15.1	NM_020857	chr15:41195886-41195945	NM_020857	Hs.23876
A_33_P3214393	5.75191	2.52404	5.75191	up	-0.0711951	-0.689973	-2.90462	-2.90462			FALSE	T cell receptor alpha variable 38-2/delta variable 8 [Source:HGNC Symbol;Acc:HGNC:12138] [ENST00000390465]			22749591	chr14	22749532	+	hs|14q11.2	D13074	chr14:22749532-22749591		Hs.495215
A_21_P0000508	2.48695	1.31438	2.48695	up	0.804166	0.397201	-0.713696	-0.713696	SNAR-D	small ILF3/NF90-associated RNA D	FALSE	Homo sapiens small ILF3/NF90-associated RNA D (SNAR-D), small nuclear RNA [NR_024243]	100170227		50643528	chr19	50643469	-	hs|19q13.33	NR_024243	chr19:50643528-50643469	NR_024243	Hs.717309
A_24_P260101	2.07962	1.05632	2.07962	up	0.568016	0.466304	-0.539163	-0.539163	MME	membrane metallo-endopeptidase	FALSE	Homo sapiens membrane metallo-endopeptidase (MME), transcript variant 2b, mRNA [NM_007289]	4311	GO:0005515|GO:0030424|GO:0005886|GO:0002003|GO:0045202|GO:0030425|GO:0005737|GO:0006508|GO:0070062|GO:0042277|GO:0044306|GO:0001822|GO:0071492|GO:0071493|GO:0046449|GO:0019233|GO:0050435|GO:0008021|GO:0005903|GO:0004175|GO:0071345|GO:0005887|GO:0008270|GO:0016021|GO:0090399|GO:0004222|GO:0005925|GO:0044267|GO:0006518|GO:0008238	154900809	chr3	154900750	+	hs|3q25.2	NM_007289	chr3:154900750-154900809	NM_007289	Hs.307734
A_33_P3210399	2.7782	1.47415	2.7782	up	1.29612	1.44328	-0.104451	-0.104451	SLC14A1	solute carrier family 14 (urea transporter), member 1 (Kidd blood group)	FALSE	Homo sapiens solute carrier family 14 (urea transporter), member 1 (Kidd blood group) (SLC14A1), transcript variant 4, mRNA [NM_001146037]	6563	GO:0016323|GO:0005886|GO:0005887|GO:0005372|GO:0015265|GO:0015204|GO:0006833|GO:0071918|GO:0055085|GO:0015840	43329871	chr18	43329812	+	hs|18q12.3	NM_001146037	chr18:43329812-43329871	NM_001146037	Hs.101307
A_21_P0004384	2.20739	1.14234	2.20739	up	-0.27213	-0.169646	-1.36323	-1.36323	lnc-CCL28-1	lnc-CCL28-1:1	FALSE	LNCipedia lincRNA (lnc-CCL28-1), lincRNA [lnc-CCL28-1:1]			43357211	chr5	43357152	-	hs|5p12		chr5:43357211-43357152
A_32_P142440	2.53173	1.34013	2.53173	up	1.21553	1.2038	-0.130461	-0.130461	PCSK9	proprotein convertase subtilisin/kexin type 9	FALSE	Homo sapiens proprotein convertase subtilisin/kexin type 9 (PCSK9), transcript variant 1, mRNA [NM_174936]	255738	GO:0005515|GO:0030134|GO:0048471|GO:0016540|GO:0010469|GO:0004252|GO:0005886|GO:0005783|GO:0070326|GO:0043621|GO:0005764|GO:0005615|GO:0043523|GO:0005737|GO:0043525|GO:0030182|GO:0034190|GO:0006508|GO:0001920|GO:0010989|GO:0022008|GO:0008203|GO:0009267|GO:0042632|GO:0005791|GO:0032869|GO:0005794|GO:0009986|GO:0005770|GO:0001822|GO:0030169|GO:0006915|GO:0031232|GO:0001889|GO:0032803|GO:0032802|GO:…	55530512	chr1	55530453	+	hs|1p32.3	NM_174936	chr1:55530453-55530512	NM_174936	Hs.18844
A_23_P312851	2.80281	1.48688	2.80281	up	0.491968	0.529314	-0.976236	-0.976236	PMEL	premelanosome protein	FALSE	Homo sapiens premelanosome protein (PMEL), transcript variant 3, mRNA [NM_006928]	6490	GO:0005515|GO:0042470|GO:0005794|GO:0042438|GO:0005886|GO:0032438|GO:0032585|GO:0005789|GO:0005576|GO:0016021	56349072	chr12	56348089	-	hs|12q13.2	NM_006928	chr12:56349072-56348089	NM_006928	Hs.95972
A_21_P0005855	5.83874	2.54566	5.83874	up	2.1241	1.95846	-0.504378	-0.504378	lnc-RP11-664D7.4.1-3	lnc-RP11-664D7.4.1-3:2	FALSE	LNCipedia lincRNA (lnc-RP11-664D7.4.1-3), lincRNA [lnc-RP11-664D7.4.1-3:2]			69972956	chr8	69972897	-	hs|8q13.2		chr8:69972956-69972897
A_32_P24376	2.61532	1.38699	2.61532	up	1.55609	1.21788	0	0	KRTAP2-3	keratin associated protein 2-3	FALSE	Homo sapiens keratin associated protein 2-3 (KRTAP2-3), mRNA [NM_001165252]	730755	GO:0045095	39215637	chr17	39215578	-	hs|17q21.2	NM_001165252	chr17:39215637-39215578	NM_001165252	Hs.406714
A_23_P83931	2.1445	1.10064	2.1445	up	1.18612	0.940749	-0.0372059	-0.0372059	NET1	neuroepithelial cell transforming 1	FALSE	Homo sapiens neuroepithelial cell transforming 1 (NET1), transcript variant 1, mRNA [NM_001047160]	10276	GO:0051056|GO:0048011|GO:0070301|GO:0043065|GO:0005886|GO:0007264|GO:0005634|GO:0097190|GO:0001558|GO:0071479|GO:0005829|GO:0005085|GO:0007165|GO:1900026|GO:0032321|GO:0017049|GO:0005089|GO:0051451	5500295	chr10	5500236	+	hs|10p15.1	NM_001047160	chr10:5500236-5500295	NM_001047160	Hs.25155
A_23_P218626	7.3297	2.87375	7.3297	up	2.8397	2.90781	0	0	NEU4	sialidase 4	FALSE	Homo sapiens sialidase 4 (NEU4), transcript variant 1, mRNA [NM_080741]	129807	GO:0005515|GO:0006665|GO:0009313|GO:0006687|GO:0006689|GO:0004308|GO:0044281|GO:0005764|GO:0052794|GO:0005739|GO:0052796|GO:0052795|GO:0019866|GO:0006516|GO:0006488|GO:0044267|GO:0043687|GO:0018279|GO:0043202	242758532	chr2	242758473	+	hs|2q37.3	NM_080741	chr2:242758473-242758532	NM_080741	Hs.551747
A_23_P255672	3.45231	1.78756	3.45231	up	1.63251	1.45904	-0.241791	-0.241791	ABLIM2	actin binding LIM protein family, member 2	FALSE	Homo sapiens actin binding LIM protein family, member 2 (ABLIM2), transcript variant 6, mRNA [NM_032432]	84448	GO:0030036|GO:0007411|GO:0045944|GO:0008270|GO:0003779|GO:0030016|GO:0015629|GO:0006351	7967135	chr4	7967076	-	hs|4p16.1	NM_032432	chr4:7967135-7967076	NM_032432	Hs.233404
A_23_P501822	2.50338	1.32388	2.50338	up	0.57223	0.455464	-0.810028	-0.810028	JUP	junction plakoglobin	FALSE	Homo sapiens junction plakoglobin (JUP), transcript variant 1, mRNA [NM_002230]	3728	GO:0005515|GO:0030057|GO:0030056|GO:0030018|GO:0090263|GO:0016342|GO:0042803|GO:0086069|GO:0016337|GO:0032993|GO:0050982|GO:0042127|GO:0002159|GO:0005856|GO:0086005|GO:0070062|GO:0071665|GO:0045296|GO:0019901|GO:0045294|GO:0019903|GO:0034329|GO:0003713|GO:0045216|GO:0009898|GO:0042307|GO:0043588|GO:0005925|GO:0034332|GO:0005882|GO:0005886|GO:0034333|GO:0035257|GO:0005634|GO:0086091|GO:0015629|GO:…	39911209	chr17	39911150	-	hs|17q21.2	NM_002230	chr17:39911209-39911150	NM_002230	Hs.514174
A_33_P3210085	2.21306	1.14604	2.21306	up	1.18737	1.12698	0.0111341	0.0111341	NET1	neuroepithelial cell transforming 1	FALSE	Homo sapiens neuroepithelial cell transforming 1 (NET1), transcript variant 1, mRNA [NM_001047160]	10276	GO:0051056|GO:0048011|GO:0070301|GO:0043065|GO:0005886|GO:0007264|GO:0005634|GO:0097190|GO:0001558|GO:0071479|GO:0005829|GO:0005085|GO:0007165|GO:1900026|GO:0032321|GO:0017049|GO:0005089|GO:0051451	5499519	chr10	5499460	+	hs|10p15.1	NM_001047160	chr10:5499460-5499519	NM_001047160	Hs.25155
A_21_P0008420	2.66303	1.41307	2.66303	up	0.690255	0.755374	-0.690255	-0.690255	lnc-RALGAPA1-3	lnc-RALGAPA1-3:1	FALSE	LNCipedia lincRNA (lnc-RALGAPA1-3), lincRNA [lnc-RALGAPA1-3:1]			36516979	chr14	36516920	-	hs|14q13.2		chr14:36516979-36516920
A_33_P3319870	2.98871	1.57952	2.98871	up	1.75781	1.54852	0.0736425	0.0736425	GREM1	gremlin 1, DAN family BMP antagonist	FALSE	Homo sapiens gremlin 1, DAN family BMP antagonist (GREM1), transcript variant 2, mRNA [NM_001191323]	26585	GO:0005515|GO:0030308|GO:0001658|GO:0033689|GO:0005615|GO:0060676|GO:0051973|GO:0016015|GO:0030297|GO:0007171|GO:0030199|GO:0090191|GO:0048018|GO:0009986|GO:0090291|GO:0030502|GO:0005125|GO:2000727|GO:0072331|GO:1900155|GO:0043184|GO:1900158|GO:0060173|GO:0090027|GO:0045892|GO:0042346|GO:0008284|GO:1900086|GO:0061098|GO:0002042|GO:0007267|GO:0010717|GO:0009954|GO:0030326|GO:0032872|GO:0060394|GO:…	33025901	chr15	33025842	+	hs|15q13.3	NM_001191323	chr15:33025842-33025901	NM_001191323	Hs.40098
A_19_P00325158	2.63359	1.39703	2.63359	up	0.256304	0.145432	-1.19616	-1.19616	MALAT1	metastasis associated lung adenocarcinoma transcript 1 (non-protein coding)	FALSE	Homo sapiens metastasis associated lung adenocarcinoma transcript 1 (non-protein coding) (MALAT1), long non-coding RNA [NR_002819]	378938		65273773	chr11	65273714	+	hs|11q13.1	NR_002819	chr11:65273714-65273773	NR_002819	Hs.621695
A_21_P0007574	3.50961	1.81131	3.50961	up	-0.252181	0.0895162	-1.89264	-1.89264	lnc-CAND1-1	lnc-CAND1-1:1	FALSE	LNCipedia lincRNA (lnc-CAND1-1), lincRNA [lnc-CAND1-1:1]			67815013	chr12	67814954	+	hs|12q15		chr12:67814954-67815013
A_21_P0008288	2.95433	1.56283	2.95433	up	-0.394191	-0.651423	-2.08564	-2.08564			FALSE				100092074	chr14	100092015	+	hs|14q32.2		chr14:100092015-100092074		Hs.131714
A_33_P3220837	2.95008	1.56076	2.95008	up	1.28982	1.08757	-0.372058	-0.372058	MAFB	v-maf avian musculoaponeurotic fibrosarcoma oncogene homolog B	FALSE	Homo sapiens v-maf avian musculoaponeurotic fibrosarcoma oncogene homolog B (MAFB), mRNA [NM_005461]	9935	GO:0005515|GO:0005667|GO:0033077|GO:0042472|GO:0003700|GO:0007379|GO:0007585|GO:0048538|GO:0005634|GO:0006351|GO:0043565|GO:0007423|GO:0021572|GO:0021571|GO:0045647|GO:0045944|GO:0035284|GO:0008134	39315666	chr20	39315607	-	hs|20q12	NM_005461	chr20:39315666-39315607	NM_005461	Hs.169487
A_23_P46238	2.79971	1.48528	2.79971	up	-0.266513	-0.519651	-1.87836	-1.87836	CELA2A	chymotrypsin-like elastase family, member 2A	FALSE	Homo sapiens chymotrypsin-like elastase family, member 2A (CELA2A), mRNA [NM_033440]	63036	GO:0004252|GO:0006508|GO:0005576|GO:0017171	15798491	chr1	15793981	+	hs|1p36.21	NM_033440	chr1:15793981-15798491	NM_033440	Hs.631866
A_23_P381261	2.49373	1.31831	2.49373	up	1.01514	1.00145	-0.310014	-0.310014	ADCY4	adenylate cyclase 4	FALSE	Homo sapiens adenylate cyclase 4 (ADCY4), transcript variant 2, mRNA [NM_139247]	196883	GO:0005515|GO:0005886|GO:0007268|GO:0007202|GO:0044281|GO:0007193|GO:0030425|GO:0046872|GO:0035556|GO:0005737|GO:0007173|GO:0071377|GO:0006171|GO:0006833|GO:0034199|GO:0048011|GO:0055085|GO:0005524|GO:0003091|GO:0007165|GO:0006112|GO:0004016|GO:0016020|GO:0008543|GO:0045087|GO:0007188|GO:0007189|GO:0016021	24787727	chr14	24787668	-	hs|14q12	NM_139247	chr14:24787727-24787668	NM_139247	Hs.443428
A_33_P3416966	2.122	1.08542	2.122	up	0.150194	-0.120424	-1.07054	-1.07054	FAXC	failed axon connections homolog (Drosophila)	FALSE	Homo sapiens failed axon connections homolog (Drosophila) (FAXC), mRNA [NM_032511]	84553	GO:0016021	99727411	chr6	99727352	-	hs|6q16.2	NM_032511	chr6:99727411-99727352	NM_032511	Hs.573245
A_21_P0014421	3.08927	1.62726	3.08927	up	0.00969744	-0.0988684	-1.67185	-1.67185			FALSE	phosphatidylinositol 4-kinase, catalytic, alpha pseudogene 2 [Source:HGNC Symbol;Acc:HGNC:33577] [ENST00000480319]			21844414	chr22	21844355	-	hs|22q11.21		chr22:21844414-21844355
A_33_P3710442	2.10847	1.0762	2.10847	up	0.33161	0.247763	-0.786508	-0.786508	FLJ11710	uncharacterized protein FLJ11710	FALSE	Homo sapiens cDNA FLJ11710 fis, clone HEMBA1005149. [AK021772]	79904		55357373	chr17	55357314	+	hs|17q22	AK021772	chr17:55357314-55357373		Hs.685929
A_21_P0003582	2.17784	1.12289	2.17784	up	0.870963	0.966625	-0.2041	-0.2041	lnc-SOD3-3	lnc-SOD3-3:1	FALSE	LNCipedia lincRNA (lnc-SOD3-3), lincRNA [lnc-SOD3-3:1]			23784388	chr4	23784329	+	hs|4p15.2		chr4:23784329-23784388
A_21_P0008829	4.209	2.07348	4.209	up	0.146759	-0.0536103	-2.0269	-2.0269	lnc-ZNF609-3	lnc-ZNF609-3:2	FALSE	LNCipedia lincRNA (lnc-ZNF609-3), lincRNA [lnc-ZNF609-3:2]			65010427	chr15	65010368	+	hs|15q22.31		chr15:65010368-65010427		Hs.559844
A_23_P32404	2.54525	1.34781	2.54525	up	0.884103	0.743873	-0.533819	-0.533819	ISG20	interferon stimulated exonuclease gene 20kDa	FALSE	Homo sapiens interferon stimulated exonuclease gene 20kDa (ISG20), transcript variant 1, mRNA [NM_002201]	3669	GO:0030619|GO:0015030|GO:0008283|GO:0008310|GO:0006364|GO:0019221|GO:0005730|GO:0034511|GO:0030620|GO:0005634|GO:0008859|GO:0009615|GO:0046872|GO:0006401|GO:0051607|GO:0004527|GO:0005737|GO:0060337|GO:0000175|GO:0016605|GO:0005654|GO:0000738|GO:0045071	89198843	chr15	89198784	+	hs|15q26.1	NM_002201	chr15:89198784-89198843	NM_002201	Hs.459265
A_21_P0000492	2.36746	1.24334	2.36746	up	0.720649	0.317653	-0.724188	-0.724188	SNAR-F	small ILF3/NF90-associated RNA F	FALSE	Homo sapiens small ILF3/NF90-associated RNA F (SNAR-F), small nuclear RNA [NR_004384]	100126781		51108330	chr19	51108271	+	hs|19q13.33	NR_004384	chr19:51108271-51108330	NR_004384	Hs.707968
A_21_P0014880	2.54774	1.34922	2.54774	up	0.64461	0.404877	-0.824474	-0.824474			FALSE				102121843	chr10	102121784	-	hs|10q24.31		chr10:102121843-102121784
A_33_P3793702	2.80688	1.48897	2.80688	up	0.599772	0.188925	-1.09462	-1.09462	LINC00964	long intergenic non-protein coding RNA 964	FALSE	Homo sapiens long intergenic non-protein coding RNA 964 (LINC00964), long non-coding RNA [NR_027321]	157381		125963293	chr8	125963234	+	hs|8q24.13	NR_027321	chr8:125963234-125963293	NR_027321	Hs.651593
A_23_P256641	2.93421	1.55297	2.93421	up	1.01432	0.944712	-0.573454	-0.573454	KCNE5	potassium channel, voltage gated subfamily E regulatory beta subunit 5	FALSE	Homo sapiens potassium channel, voltage gated subfamily E regulatory beta subunit 5 (KCNE5), mRNA [NM_012282]	23630	GO:0008016|GO:0060306|GO:0015459|GO:2001257|GO:0060307|GO:0086091|GO:0060048|GO:0044325|GO:0071435|GO:0086008|GO:0060372|GO:0005249|GO:0008076|GO:0086013|GO:0086014|GO:0071805|GO:0086005	108867052	chrX	108866993	-	hs|Xq23	NM_012282	chrX:108867052-108866993	NM_012282	Hs.522753
A_24_P206776	2.48967	1.31596	2.48967	up	0.617378	0.431724	-0.791405	-0.791405	CRYAB	crystallin, alpha B	FALSE	Homo sapiens crystallin, alpha B (CRYAB), transcript variant 1, mRNA [NM_001885]	1410	GO:0005515|GO:0008017|GO:0042542|GO:0005212|GO:0030018|GO:0030308|GO:0005886|GO:0005634|GO:0071480|GO:0031109|GO:0032432|GO:0051403|GO:0046872|GO:0042803|GO:0042802|GO:0005829|GO:0005739|GO:0005737|GO:0006936|GO:0006457|GO:0002088|GO:0015630|GO:0051260|GO:0043154|GO:0032355|GO:0010941|GO:0070062|GO:0001666|GO:0043066|GO:0005794|GO:0032387|GO:0009986|GO:0007568|GO:0060561|GO:0007517|GO:0007021|GO:…	111779635	chr11	111779576	-	hs|11q23.1	NM_001885	chr11:111779635-111779576	NM_001885	Hs.53454
A_21_P0010979	2.01459	1.01048	2.01459	up	1.05406	0.893786	-0.036562	-0.036562			FALSE	PREDICTED: Homo sapiens putative ubiquitin-like protein FUBI-like protein ENSP00000310146-like (LOC101927789), transcript variant X2, mRNA [XM_006718754]			65223006	chr11	65222947	+	hs|11q13.1	XM_006718754	chr11:65222947-65223006	XM_006718754	Hs.433026
A_23_P431388	2.60919	1.3836	2.60919	up	1.68674	1.50594	0.212736	0.212736	SPOCD1	SPOC domain containing 1	FALSE	Homo sapiens SPOC domain containing 1 (SPOCD1), transcript variant 1, mRNA [NM_144569]	90853	GO:0010923|GO:0006351	32256093	chr1	32256034	-	hs|1p35.2	NM_144569	chr1:32256093-32256034	NM_144569	Hs.62604
A_21_P0007854	2.74746	1.4581	2.74746	up	1.42259	1.19223	-0.15069	-0.15069	lnc-HNF1A-1	lnc-HNF1A-1:4	FALSE	LNCipedia lincRNA (lnc-HNF1A-1), lincRNA [lnc-HNF1A-1:4]			121343118	chr12	121343059	+	hs|12q24.31		chr12:121343059-121343118
A_33_P3361152	2.11437	1.08022	2.11437	up	1.1394	1.12639	0.0526671	0.0526671	LINC01119	long intergenic non-protein coding RNA 1119	FALSE	Homo sapiens long intergenic non-protein coding RNA 1119 (LINC01119), long non-coding RNA [NR_024452]	100134259		47086145	chr2	47086086	+	hs|2p21	NR_024452	chr2:47086086-47086145	NR_024452	Hs.114449
A_21_P0000277	2.2278	1.15562	2.2278	up	0.363073	0.0149827	-0.966592	-0.966592	SNORD37	small nucleolar RNA, C/D box 37	FALSE	Homo sapiens small nucleolar RNA, C/D box 37 (SNORD37), small nucleolar RNA [NR_002602]	26812		3982564	chr19	3982505	-	hs|19p13.3	NR_002602	chr19:3982564-3982505	NR_002602
A_24_P923251	2.2324	1.15859	2.2324	up	1.37871	1.35129	0.206407	0.206407	TGM2	transglutaminase 2	FALSE	Homo sapiens transglutaminase 2 (TGM2), transcript variant 2, mRNA [NM_198951]	7052	GO:0005515|GO:0043065|GO:0005886|GO:0019904|GO:0043277|GO:0005525|GO:0048661|GO:0046872|GO:0045785|GO:0005829|GO:0005739|GO:0051561|GO:0001974|GO:0051482|GO:0003810|GO:0050729|GO:0051260|GO:0018153|GO:0060662|GO:0043123|GO:0005925|GO:0032471|GO:0070062|GO:0060445	36766505	chr20	36766446	-	hs|20q11.23	NM_198951	chr20:36766505-36766446	NM_198951	Hs.517033
A_33_P3246885	2.3547	1.23554	2.3547	up	0.684428	0.34577	-0.720441	-0.720441	DMKN	dermokine	FALSE	Homo sapiens dermokine (DMKN), transcript variant 9, mRNA [NM_001190348]	93099	GO:0005515|GO:0005615|GO:0070062	35994272	chr19	35994213	-	hs|19q13.12	NM_001190348	chr19:35994272-35994213	NM_001190348	Hs.417795
A_33_P3390656	44.6003	5.47898	44.6003	up	2.49304	2.72666	-2.86913	-2.86913	ACSL6	acyl-CoA synthetase long-chain family member 6	FALSE	Homo sapiens acyl-CoA synthetase long-chain family member 6 (ACSL6), transcript variant 2, mRNA [NM_001009185]	23305	GO:0001676|GO:0005886|GO:0005741|GO:0005634|GO:0044281|GO:0035338|GO:0042803|GO:0007405|GO:0048666|GO:0019432|GO:0044255|GO:0005778|GO:0006637|GO:0001666|GO:0032869|GO:0010867|GO:0007584|GO:0010747|GO:0008654|GO:0048545|GO:0005524|GO:0004467|GO:0009629|GO:0016020|GO:0010976|GO:0005789|GO:0015908|GO:0016021|GO:0019899	131302223	chr5	131302164	-	hs|5q31.1	NM_001009185	chr5:131302223-131302164	NM_001009185	Hs.14945
A_23_P121374	8.76236	3.13132	8.76236	up	2.91425	2.33313	-0.507627	-0.507627	SEMA5B	sema domain, seven thrombospondin repeats (type 1 and type 1-like), transmembrane domain (TM) and short cytoplasmic domain, (semaphorin) 5B	FALSE	Homo sapiens sema domain, seven thrombospondin repeats (type 1 and type 1-like), transmembrane domain (TM) and short cytoplasmic domain, (semaphorin) 5B (SEMA5B), transcript variant 1, mRNA [NM_001031702]	54437	GO:0004872|GO:0016021|GO:0030154|GO:0007399	122628245	chr3	122628186	-	hs|3q21.1	NM_001031702	chr3:122628245-122628186	NM_001031702	Hs.210870
A_23_P208788	2.5978	1.37729	2.5978	up	0.821808	0.609179	-0.661797	-0.661797	C19orf33	chromosome 19 open reading frame 33	FALSE	Homo sapiens chromosome 19 open reading frame 33 (C19orf33), mRNA [NM_033520]	64073	GO:0008150|GO:0003690|GO:0003697|GO:0005634	38795640	chr19	38795581	+	hs|19q13.2	NM_033520	chr19:38795581-38795640	NM_033520	Hs.631544
A_24_P106542	2.49547	1.31931	2.49547	up	0.830206	0.697229	-0.555597	-0.555597	RSPO3	R-spondin 3	FALSE	Homo sapiens R-spondin 3 (RSPO3), mRNA [NM_032784]	84870	GO:0005109|GO:0001664|GO:0090263|GO:0060670|GO:0005102|GO:0005576|GO:0060070|GO:0008201|GO:0005615	127476576	chr6	127476517	+	hs|6q22.33	NM_032784	chr6:127476517-127476576	NM_032784	Hs.135254
A_33_P3587376	2.32737	1.2187	2.32737	up	0.74963	0.335522	-0.676123	-0.676123	SNAR-A3	small ILF3/NF90-associated RNA A3	FALSE	Homo sapiens small ILF3/NF90-associated RNA A3 (SNAR-A3), small nuclear RNA [NR_024214]	100169951		48427136	chr19	48427077	+	hs|19q13.33	NR_024214	chr19:48427077-48427136	NR_024214	Hs.723094
A_23_P386942	2.06463	1.04589	2.06463	up	1.33798	1.15415	0.200176	0.200176	DIRAS1	DIRAS family, GTP-binding RAS-like 1	FALSE	Homo sapiens DIRAS family, GTP-binding RAS-like 1 (DIRAS1), mRNA [NM_145173]	148252	GO:0006184|GO:0005886|GO:0043406|GO:0007264|GO:0003924|GO:0005525|GO:0051019	2714640	chr19	2714581	-	hs|19p13.3	NM_145173	chr19:2714640-2714581	NM_145173	Hs.172753
A_23_P45324	2.18315	1.12641	2.18315	up	0.518755	0.240486	-0.746791	-0.746791	TMEM35	transmembrane protein 35	FALSE	Homo sapiens transmembrane protein 35 (TMEM35), mRNA [NM_021637]	59353	GO:0008150|GO:0003674|GO:0016023|GO:0016021|GO:0005575|GO:0005778	100351289	chrX	100351230	+	hs|Xq22.1	NM_021637	chrX:100351230-100351289	NM_021637	Hs.45140
A_21_P0014724	3.06069	1.61385	3.06069	up	1.09689	0.916162	-0.607327	-0.607327	LOC100507336	uncharacterized LOC100507336	FALSE	PREDICTED: Homo sapiens uncharacterized LOC100507336 (LOC100507336), transcript variant X1, ncRNA [XR_251947]	100507336		3688435	chr6	3688378	-	hs|6p25.2	XR_251947	chr6:3688435-3688378	XR_251947	Hs.104944
A_23_P205489	2.12772	1.08931	2.12772	up	0.64892	0.265934	-0.631884	-0.631884	SLC7A8	solute carrier family 7 (amino acid transporter light chain, L system), member 8	FALSE	Homo sapiens solute carrier family 7 (amino acid transporter light chain, L system), member 8 (SLC7A8), transcript variant 2, mRNA [NM_182728]	23428	GO:0005515|GO:0019534|GO:0006520|GO:0015695|GO:0005886|GO:0006865|GO:0009636|GO:0050900|GO:0055085|GO:0015101|GO:0055065|GO:0016323|GO:0015804|GO:0005737|GO:0015171|GO:0005887|GO:0007596|GO:0042605|GO:0006810|GO:0015175|GO:0015179|GO:0070062|GO:0006811	23594713	chr14	23594654	-	hs|14q11.2	NM_182728	chr14:23594713-23594654	NM_182728	Hs.596643
A_21_P0002960	2.47542	1.30768	2.47542	up	0.718196	0.557449	-0.669853	-0.669853			FALSE	Homo sapiens cDNA FLJ36372 fis, clone THYMU2008072. [AK093691]			50709358	chr3	50709299	+	hs|3p21.2		chr3:50709299-50709358		Hs.732795
A_32_P183765	2.42963	1.28074	2.42963	up	0.326483	0.309078	-0.962959	-0.962959	ERBB4	erb-b2 receptor tyrosine kinase 4	FALSE	Homo sapiens erb-b2 receptor tyrosine kinase 4 (ERBB4), transcript variant JM-a/CVT-1, mRNA [NM_005235]	2066	GO:0060045|GO:0005515|GO:0021551|GO:0005154|GO:0044212|GO:0001755|GO:0042803|GO:0007507|GO:0009880|GO:0060644|GO:0046777|GO:0007173|GO:0043552|GO:0005759|GO:0070374|GO:0023014|GO:0030334|GO:0018108|GO:0043235|GO:0045165|GO:0008543|GO:0045087|GO:0021889|GO:0005654|GO:0045893|GO:0038095|GO:0008284|GO:0008285|GO:0005886|GO:0008283|GO:0042523|GO:0005634|GO:0005829|GO:0005739|GO:0016323|GO:0061026|GO:…	212240574	chr2	212240515	-	hs|2q34	NM_005235	chr2:212240574-212240515	NM_005235	Hs.390729
A_23_P77731	3.17706	1.66769	3.17706	up	1.48476	1.37682	-0.236902	-0.236902	CRYM	crystallin, mu	FALSE	Homo sapiens crystallin, mu (CRYM), mRNA [NM_001888]	1428	GO:0050661|GO:0003714|GO:0007605|GO:0070327|GO:0005634|GO:0000122|GO:0070324|GO:0042803|GO:0005739|GO:0047127|GO:0042403|GO:0005737|GO:0055114|GO:0070062	21270022	chr16	21269963	-	hs|16p12.2	NM_001888	chr16:21270022-21269963	NM_001888	Hs.924
A_23_P31376	2.14672	1.10214	2.14672	up	0.287275	0.148492	-0.884253	-0.884253	LRRN3	leucine rich repeat neuronal 3	FALSE	Homo sapiens leucine rich repeat neuronal 3 (LRRN3), transcript variant 3, mRNA [NM_018334]	54674	GO:0030131|GO:0005886|GO:0001934|GO:0016021|GO:0032403	110764830	chr7	110764771	+	hs|7q31.1	NM_018334	chr7:110764771-110764830	NM_018334	Hs.3781
A_33_P3317392	2.06564	1.04659	2.06564	up	0.11761	0.217072	-0.879248	-0.879248	ADAMTS19	ADAM metallopeptidase with thrombospondin type 1 motif, 19	FALSE	Homo sapiens ADAM metallopeptidase with thrombospondin type 1 motif, 19 (ADAMTS19), mRNA [NM_133638]	171019	GO:0006508|GO:0005578|GO:0008270|GO:0004222	129074293	chr5	129074234	+	hs|5q23.3	NM_133638	chr5:129074234-129074293	NM_133638	Hs.23751
A_23_P62081	7.32871	2.87356	7.32871	up	3.69784	3.41606	0.683394	0.683394	SCG5	secretogranin V (7B2 protein)	FALSE	Homo sapiens secretogranin V (7B2 protein) (SCG5), transcript variant 2, mRNA [NM_003020]	6447	GO:0005515|GO:0004857|GO:0016486|GO:0007218|GO:0046883|GO:0005576|GO:0051082|GO:0030141|GO:0005525|GO:0043086|GO:0006886	32989165	chr15	32989106	+	hs|15q13.3	NM_003020	chr15:32989106-32989165	NM_003020	Hs.156540
A_21_P0000361	2.0997	1.07018	2.0997	up	0.595954	0.238914	-0.65275	-0.65275	SNORA79	small nucleolar RNA, H/ACA box 79	FALSE	Homo sapiens small nucleolar RNA, H/ACA box 79 (SNORA79), small nucleolar RNA [NR_003021]	677845		81669099	chr14	81669040	-	hs|14q31.1	NR_003021	chr14:81669099-81669040	NR_003021	Hs.693251
A_33_P3260175	3.45922	1.79045	3.45922	up	-0.81157	-0.427112	-2.40979	-2.40979			FALSE				16860561	chr1	16860502	-	hs|1p36.13	BC036435	chr1:16860561-16860502		Hs.645945
A_21_P0013086	2.40174	1.26408	2.40174	up	-0.0950816	-0.315584	-1.46941	-1.46941	LOC101928307	uncharacterized LOC101928307	FALSE	Homo sapiens uncharacterized LOC101928307 (LOC101928307), long non-coding RNA [NR_125872]	101928307		69342796	chr6	69342737	-	hs|6q12	NR_125872	chr6:69342796-69342737	NR_125872	Hs.535825
A_21_P0002628	2.51137	1.32847	2.51137	up	1.79129	1.42166	0.278002	0.278002	LOC102724849	uncharacterized LOC102724849	FALSE	Homo sapiens uncharacterized LOC102724849 (LOC102724849), long non-coding RNA [NR_110607]	102724849		216328523	chr2	216328464	+	hs|2q35	NR_110607	chr2:216328464-216328523	NR_110607
A_32_P146659	2.03242	1.0232	2.03242	up	-0.119537	-0.114142	-1.14004	-1.14004	ATP6V0E2-AS1	ATP6V0E2 antisense RNA 1	FALSE	Homo sapiens ATP6V0E2 antisense RNA 1 (ATP6V0E2-AS1), long non-coding RNA [NR_027040]	401431		149564956	chr7	149564897	-	hs|7q36.1	NR_027040	chr7:149564956-149564897	NR_027040	Hs.744860
A_33_P3250671	3.32304	1.7325	3.32304	up	1.65449	1.81052	0	0	TCF7	transcription factor 7 (T-cell specific, HMG-box)	FALSE	Homo sapiens transcription factor 7 (T-cell specific, HMG-box) (TCF7), transcript variant 1, mRNA [NM_003202]	6932	GO:0005515|GO:0005667|GO:0003700|GO:0044212|GO:0006357|GO:0008013|GO:0033153|GO:0046632|GO:0048699|GO:0044336|GO:0005634|GO:0006351|GO:0043565|GO:0006955|GO:0048557|GO:0007420|GO:0048619|GO:0042127|GO:0003682|GO:0030538|GO:0021915|GO:0071353|GO:0005654|GO:0060070	133478567	chr5	133478508	+	hs|5q31.1	NM_003202	chr5:133478508-133478567	NM_003202	Hs.573153
A_19_P00324839	2.30293	1.20347	2.30293	up	0.618948	0.227858	-0.780068	-0.780068	MALAT1	metastasis associated lung adenocarcinoma transcript 1 (non-protein coding)	FALSE	Homo sapiens metastasis associated lung adenocarcinoma transcript 1 (non-protein coding) (MALAT1), long non-coding RNA [NR_002819]	378938		65273570	chr11	65273511	+	hs|11q13.1	NR_002819	chr11:65273511-65273570	NR_002819	Hs.621695
A_32_P119569	2.35133	1.23348	2.35133	up	0.169124	0.13883	-1.0795	-1.0795	GOLGA8EP	golgin A8 family, member E, pseudogene	FALSE	Homo sapiens golgin A8 family, member E, pseudogene (GOLGA8EP), non-coding RNA [NR_033350]	390535		23438849	chr15	23437935	+	hs|15q11.2	NR_033350	chr15:23437935-23438849	NR_033350	Hs.454647
A_33_P3738458	2.02172	1.01558	2.02172	up	1.13611	0.895057	0	0	TNS1	tensin 1	FALSE	Homo sapiens tensin 1 (TNS1), mRNA [NM_022648]	7145	GO:0005515|GO:0010761|GO:0005737|GO:0009986|GO:0007044|GO:0003779|GO:0005856|GO:0005925	218667628	chr2	218667569	-	hs|2q35	NM_022648	chr2:218667628-218667569	NM_022648	Hs.471381
A_33_P3416420	2.38372	1.25322	2.38372	up	0.187519	-0.215398	-1.26716	-1.26716	ZUFSP	zinc finger with UFM1-specific peptidase domain	FALSE	Homo sapiens zinc finger with UFM1-specific peptidase domain (ZUFSP), mRNA [NM_145062]	221302	GO:0046872	116980048	chr6	116979989	-	hs|6q22.1	NM_145062	chr6:116980048-116979989	NM_145062	Hs.29857
A_23_P41390	2.81257	1.49189	2.81257	up	1.91688	1.93851	0.435805	0.435805	SH3TC1	SH3 domain and tetratricopeptide repeats 1	FALSE	Homo sapiens SH3 domain and tetratricopeptide repeats 1 (SH3TC1), mRNA [NM_018986]	54436	GO:0008150|GO:0005575	8239379	chr4	8239319	+	hs|4p16.1	NM_018986	chr4:8239319-8239379	NM_018986	Hs.479116
A_23_P110403	2.65134	1.40672	2.65134	up	1.85287	1.51936	0.27939	0.27939	PDLIM3	PDZ and LIM domain 3	FALSE	Homo sapiens PDZ and LIM domain 3 (PDLIM3), transcript variant 1, mRNA [NM_014476]	27295	GO:0008092|GO:0007507|GO:0005515|GO:0030018|GO:0005737|GO:0008270|GO:0007015|GO:0015629|GO:0008307	186423262	chr4	186423203	-	hs|4q35.1	NM_014476	chr4:186423262-186423203	NM_014476	Hs.701364
A_21_P0010984	3.96751	1.98823	3.96751	up	2.11291	1.86355	0	0	LOC100505504	uncharacterized LOC100505504	FALSE	PREDICTED: Homo sapiens uncharacterized LOC100505504 (LOC100505504), transcript variant X6, ncRNA [XR_428947]	100505504		66184321	chr11	66178443	+	hs|11q13.2	XR_428947	chr11:66178443-66184321	XR_428947	Hs.171485
A_33_P3337134	2.82558	1.49854	2.82558	up	1.65725	1.68501	0.172581	0.172581	ABLIM2	actin binding LIM protein family, member 2	FALSE	Homo sapiens actin binding LIM protein family, member 2 (ABLIM2), transcript variant 1, mRNA [NM_001130083]	84448	GO:0030036|GO:0007411|GO:0045944|GO:0008270|GO:0003779|GO:0030016|GO:0015629|GO:0006351	7968094	chr4	7968035	-	hs|4p16.1	NM_001130083	chr4:7968094-7968035	NM_001130083	Hs.233404
A_23_P19182	2.15887	1.11027	2.15887	up	0.681707	0.377381	-0.58073	-0.58073	REEP2	receptor accessory protein 2	FALSE	Homo sapiens receptor accessory protein 2 (REEP2), transcript variant 2, mRNA [NM_016606]	51308	GO:0005881|GO:0032386|GO:0050913|GO:0005887|GO:0005783|GO:0071786|GO:0031883|GO:0005789|GO:0050916|GO:0032596|GO:0070062	137782636	chr5	137782577	+	hs|5q31.2	NM_016606	chr5:137782577-137782636	NM_016606	Hs.416090
A_33_P3286218	2.10734	1.07542	2.10734	up	0.586376	0.328208	-0.618132	-0.618132	DLEU2L	deleted in lymphocytic leukemia 2-like	FALSE	Homo sapiens deleted in lymphocytic leukemia 2-like (DLEU2L), non-coding RNA [NR_002771]	79469		64015021	chr1	64014962	+	hs|1p31.3	NR_002771	chr1:64014962-64015021	NR_002771	Hs.659291
A_21_P0013453	2.11744	1.08232	2.11744	up	0.66673	0.405745	-0.546082	-0.546082	LINC-PINT	long intergenic non-protein coding RNA, p53 induced transcript	FALSE	Homo sapiens long intergenic non-protein coding RNA, p53 induced transcript (LINC-PINT), transcript variant 9, long non-coding RNA [NR_034120]	378805		130566653	chr7	130566594	-	hs|7q32.3	NR_034120	chr7:130566653-130566594	NR_034120	Hs.150556
A_33_P3347417	2.49169	1.31712	2.49169	up	1.23896	0.993838	-0.200726	-0.200726	SPEN	spen family transcriptional repressor	FALSE	Homo sapiens spen family transcriptional repressor (SPEN), mRNA [NM_015001]	23013	GO:0001191|GO:0005515|GO:0003700|GO:0003714|GO:0000122|GO:0006351|GO:0000166|GO:0003697|GO:0007219|GO:0050769|GO:0017053|GO:0001085|GO:0016032|GO:0005654|GO:0045893|GO:0045892|GO:0070062	16255167	chr1	16255108	+	hs|1p36.13	NM_015001	chr1:16255108-16255167	NM_015001	Hs.744843
A_24_P83075	2.2835	1.19125	2.2835	up	0.421886	0.144904	-0.907852	-0.907852	LINC00205	long intergenic non-protein coding RNA 205	FALSE	PREDICTED: Homo sapiens putative uncharacterized protein encoded by LINC00205-like (LOC102723489), mRNA [XM_006724071]	102723489		46714317	chr21	46714258	-	hs|21q22.3	XM_006724071	chr21:46714317-46714258	XM_006724071	Hs.11637
A_19_P00315593	2.37654	1.24886	2.37654	up	0.190239	-0.190239	-1.24886	-1.24886			FALSE				173132674	chr5	173132615	+	hs|5q35.2		chr5:173132615-173132674		Hs.582570
A_23_P2271	2.15824	1.10986	2.15824	up	0.880766	0.855334	-0.241807	-0.241807	PTHLH	parathyroid hormone-like hormone	FALSE	Homo sapiens parathyroid hormone-like hormone (PTHLH), transcript variant 1, mRNA [NM_198965]	5744	GO:0010468|GO:0008284|GO:0008285|GO:0030819|GO:0007267|GO:0051428|GO:0005615|GO:0043433|GO:0005737|GO:0016485|GO:0060649|GO:0030855|GO:0043129|GO:0032331|GO:0007565|GO:0005794|GO:0048286|GO:0046058|GO:0005576|GO:0060659|GO:0001958|GO:0001501|GO:0007492|GO:0005179|GO:0002076|GO:0008544|GO:0005654|GO:0007189	28116401	chr12	28116342	-	hs|12p11.22	NM_198965	chr12:28116401-28116342	NM_198965	Hs.591159
A_23_P25194	3.04882	1.60825	3.04882	up	1.1158	0.942086	-0.579309	-0.579309	HRK	harakiri, BCL2 interacting protein	FALSE	Homo sapiens harakiri, BCL2 interacting protein (HRK), transcript variant 1, mRNA [NM_003806]	8739	GO:0032464|GO:0005739|GO:0005515|GO:0043065|GO:0090200|GO:0006915|GO:0016021	117299112	chr12	117299053	-	hs|12q24.22	NM_003806	chr12:117299112-117299053	NM_003806	Hs.87247
A_33_P3394140	3.74969	1.90677	3.74969	up	1.93989	1.80463	-0.0345106	-0.0345106	ZMIZ1-AS1	ZMIZ1 antisense RNA 1	FALSE	Homo sapiens ZMIZ1 antisense RNA 1 (ZMIZ1-AS1), transcript variant 1, long non-coding RNA [NR_024431]	283050		80703155	chr10	80703096	-	hs|10q22.3	NR_024431	chr10:80703155-80703096	NR_024431	Hs.309176
A_33_P3335147	2.28864	1.19449	2.28864	up	0.723308	0.52475	-0.570464	-0.570464	MURC	muscle-related coiled-coil protein	FALSE	Homo sapiens muscle-related coiled-coil protein (MURC), mRNA [NM_001018116]	347273	GO:0030018|GO:0005737|GO:0007517|GO:0045944|GO:0030154|GO:0006351	103349852	chr9	103349793	+	hs|9q31.1	NM_001018116	chr9:103349793-103349852	NM_001018116	Hs.99004
A_33_P3395651	2.14404	1.10033	2.14404	up	-0.00294709	0.128058	-1.03778	-1.03778	PCDHGA5	protocadherin gamma subfamily A, 5	FALSE	Homo sapiens protocadherin gamma subfamily A, 5 (PCDHGA5), transcript variant 2, mRNA [NM_032054]	56110	GO:0005886|GO:0005509|GO:0016021|GO:0007156	140746279	chr5	140746220	+	hs|5q31.3	NM_032054	chr5:140746220-140746279	NM_032054	Hs.368160
A_33_P3336686	2.39974	1.26288	2.39974	up	0.778064	0.350762	-0.698462	-0.698462	CLIC3	chloride intracellular channel 3	FALSE	Homo sapiens chloride intracellular channel 3 (CLIC3), mRNA [NM_004669]	9022	GO:0005515|GO:0007165|GO:0006821|GO:0005737|GO:0005244|GO:0034707|GO:0034765|GO:0005634|GO:0005254|GO:0070062	139889119	chr9	139889060	-	hs|9q34.3	NM_004669	chr9:139889119-139889060	NM_004669	Hs.64746
A_33_P3377911	2.19798	1.13618	2.19798	up	0.883211	0.82591	-0.281619	-0.281619			FALSE	microRNA 29b-1 [Source:HGNC Symbol;Acc:HGNC:31619] [ENST00000432045]			130565591	chr7	130565532	-	hs|7q32.3		chr7:130565591-130565532
A_33_P3237150	2.12241	1.0857	2.12241	up	0.931405	0.607611	-0.316192	-0.316192	BMP2	bone morphogenetic protein 2	FALSE	Homo sapiens bone morphogenetic protein 2 (BMP2), mRNA [NM_001200]	650	GO:0005515|GO:0001658|GO:0003181|GO:0009790|GO:0005615|GO:0010894|GO:0003308|GO:0007507|GO:0007219|GO:0002062|GO:0030198|GO:0009887|GO:0033690|GO:0004745|GO:0030335|GO:0030501|GO:0009986|GO:0019211|GO:0000122|GO:0021978|GO:0030509|GO:0005160|GO:0005125|GO:0001701|GO:0001649|GO:0003130|GO:0001501|GO:0045165|GO:0045600|GO:0040007|GO:0035630|GO:0008083|GO:0008285|GO:0042482|GO:0007267|GO:0010718|GO:…	6760869	chr20	6760810	+	hs|20p12.3	NM_001200	chr20:6760810-6760869	NM_001200	Hs.73853
A_21_P0005853	9.42098	3.23588	9.42098	up	2.54174	2.37153	-0.779243	-0.779243	LOC100505718	uncharacterized LOC100505718	FALSE	Homo sapiens uncharacterized LOC100505718 (LOC100505718), long non-coding RNA [NR_039986]	100505718		69836687	chr8	69836628	-	hs|8q13.2	NR_039986	chr8:69836687-69836628	NR_039986	Hs.122386
A_23_P48698	4.13096	2.04648	4.13096	up	0.473459	0.010886	-1.8043	-1.8043	ADAM20	ADAM metallopeptidase domain 20	FALSE	Homo sapiens ADAM metallopeptidase domain 20 (ADAM20), mRNA [NM_003814]	8748	GO:0007338|GO:0005886|GO:0006508|GO:0008270|GO:0016021|GO:0007339|GO:0004222|GO:0008237|GO:0032504	70989433	chr14	70989374	-	hs|14q24.2	NM_003814	chr14:70989433-70989374	NM_003814	Hs.177984
A_23_P53390	7.90467	2.98271	7.90467	up	1.83684	1.90171	-1.11343	-1.11343	PTPRB	protein tyrosine phosphatase, receptor type, B	FALSE	Homo sapiens protein tyrosine phosphatase, receptor type, B (PTPRB), transcript variant 2, mRNA [NM_002837]	5787	GO:0043235|GO:0005515|GO:0006470|GO:0005887|GO:0005001|GO:0016311|GO:0006796|GO:0001525|GO:0035335	70925829	chr12	70918327	-	hs|12q15	NM_002837	chr12:70925829-70918327	NM_002837	Hs.434375
A_24_P248185	2.44171	1.28789	2.44171	up	0.659311	0.250128	-0.833174	-0.833174	PIANP	PILR alpha associated neural protein	FALSE	Homo sapiens PILR alpha associated neural protein (PIANP), transcript variant 1, mRNA [NM_153685]	196500	GO:0016323|GO:0005912|GO:0016021	6803073	chr12	6803014	-	hs|12p13.31	NM_153685	chr12:6803073-6803014	NM_153685	Hs.44067
A_23_P128084	2.01114	1.00801	2.01114	up	0.392343	0.351432	-0.636127	-0.636127	ITGA7	integrin, alpha 7	FALSE	Homo sapiens integrin, alpha 7 (ITGA7), transcript variant 2, mRNA [NM_002206]	3679	GO:0031594|GO:0046982|GO:0005886|GO:0009986|GO:0008360|GO:0048514|GO:0034677|GO:0035987|GO:0046872|GO:0042383|GO:0005737|GO:0005178|GO:0007517|GO:0007160|GO:0016477|GO:0007229|GO:0007519|GO:0030198|GO:0043236|GO:0034113|GO:0005927	56078479	chr12	56078420	-	hs|12q13.2	NM_002206	chr12:56078479-56078420	NM_002206	Hs.524484
A_21_P0013638	2.48361	1.31244	2.48361	up	1.56854	1.44706	0.195362	0.195362	KGFLP1	fibroblast growth factor 7 pseudogene	FALSE	Homo sapiens fibroblast growth factor 7 pseudogene (KGFLP1), transcript variant 1, non-coding RNA [NR_047527]	387628		46744262	chr9	46744203	+	hs|9p11.2	NR_047527	chr9:46744203-46744262	NR_047527	Hs.439341
A_21_P0000487	2.07095	1.05029	2.07095	up	0.218907	-0.0962465	-0.988961	-0.988961	SNORD94	small nucleolar RNA, C/D box 94	FALSE	Homo sapiens small nucleolar RNA, C/D box 94 (SNORD94), small nucleolar RNA [NR_004378]	692225		86363129	chr2	86363070	+	hs|2p11.2	NR_004378	chr2:86363070-86363129	NR_004378	Hs.723087
A_33_P3389827	2.79104	1.4808	2.79104	up	0.995371	0.671383	-0.647427	-0.647427	PROM2	prominin 2	FALSE	Homo sapiens prominin 2 (PROM2), transcript variant 1, mRNA [NM_001165978]	150696	GO:0060170|GO:0009986|GO:0031528|GO:0031410|GO:0042995|GO:0044393|GO:0043088|GO:2001287|GO:0005902|GO:0005929|GO:0016323|GO:0016324|GO:0031346|GO:0005887|GO:0015485|GO:0048550|GO:2000369|GO:0071914|GO:0001934|GO:0045121|GO:0070062	95956061	chr2	95956002	+	hs|2q11.1	NM_001165978	chr2:95956002-95956061	NM_001165978	Hs.469313
A_33_P3230723	2.70882	1.43767	2.70882	up	0.0817838	0.274517	-1.25952	-1.25952	KIF1B	kinesin family member 1B	FALSE	Homo sapiens kinesin family member 1B (KIF1B), transcript variant 2, mRNA [NM_183416]	23095	GO:0005515|GO:0008017|GO:0043005|GO:0005871|GO:0006200|GO:0005875|GO:0005874|GO:0006915|GO:0031410|GO:0007274|GO:0003777|GO:0005524|GO:0007270|GO:0030705|GO:0005739|GO:0047497|GO:0008574|GO:0019894|GO:0008089|GO:0016192|GO:0016887|GO:0030659|GO:0007018	10364606	chr1	10364547	+	hs|1p36.22	NM_183416	chr1:10364547-10364606	NM_183416	Hs.97858
A_19_P00809119	2.04202	1.03	2.04202	up	1.02986	0.725065	-0.152534	-0.152534	CASC15	cancer susceptibility candidate 15 (non-protein coding)	FALSE	Homo sapiens cancer susceptibility candidate 15 (non-protein coding) (CASC15), long non-coding RNA [NR_015410]	401237		22111058	chr6	22110999	+	hs|6p22.3	NR_015410	chr6:22110999-22111058	NR_015410	Hs.712707
A_24_P369232	2.27433	1.18544	2.27433	up	0.608354	0.604041	-0.579245	-0.579245	CCDC3	coiled-coil domain containing 3	FALSE	Homo sapiens coiled-coil domain containing 3 (CCDC3), transcript variant 1, mRNA [NM_031455]	83643	GO:0005783|GO:0005576	12938688	chr10	12938629	-	hs|10p13	NM_031455	chr10:12938688-12938629	NM_031455	Hs.498720
A_24_P105733	2.24293	1.16538	2.24293	up	1.27394	1.05682	0	0	TNS1	tensin 1	FALSE	Homo sapiens tensin 1 (TNS1), mRNA [NM_022648]	7145	GO:0005515|GO:0010761|GO:0005737|GO:0009986|GO:0007044|GO:0003779|GO:0005856|GO:0005925	218749779	chr2	218747097	-	hs|2q35	NM_022648	chr2:218749779-218747097	NM_022648	Hs.471381
A_33_P3343442	2.09162	1.06462	2.09162	up	0.299161	0.230413	-0.799836	-0.799836	ZNF316	zinc finger protein 316	FALSE	Homo sapiens zinc finger protein 316 (ZNF316), mRNA [NM_001278559]	100131017	GO:0006355|GO:0005634|GO:0003677|GO:0046872|GO:0006351	6694242	chr7	6694183	+	hs|7p22.1	NM_001278559	chr7:6694183-6694242	NM_001278559
A_23_P50946	2.90266	1.53738	2.90266	up	0.889093	0.644682	-0.77049	-0.77049	RAMP1	receptor (G protein-coupled) activity modifying protein 1	FALSE	Homo sapiens receptor (G protein-coupled) activity modifying protein 1 (RAMP1), mRNA [NM_005855]	10267	GO:0004948|GO:0005515|GO:0005886|GO:0009986|GO:0030819|GO:0031716|GO:0001525|GO:0015031|GO:0015026|GO:0072659|GO:0005615|GO:0006886|GO:0043235|GO:0031623|GO:0008277|GO:0007186|GO:0005887|GO:0008565|GO:0004872|GO:0006816|GO:0060050	238820720	chr2	238820661	+	hs|2q37.3	NM_005855	chr2:238820661-238820720	NM_005855	Hs.471783
A_24_P212811	2.35341	1.23475	2.35341	up	1.0115	1.0932	-0.182401	-0.182401	ANKRD34A	ankyrin repeat domain 34A	FALSE	Homo sapiens ankyrin repeat domain 34A (ANKRD34A), mRNA [NM_001039888]	284615	GO:0005737	145475106	chr1	145475047	+	hs|1q21.1	NM_001039888	chr1:145475047-145475106	NM_001039888	Hs.620591
A_33_P3336384	2.06533	1.04637	2.06533	up	1.00666	1.08608	0	0	PAOX	polyamine oxidase (exo-N4-amino)	FALSE	Homo sapiens polyamine oxidase (exo-N4-amino) (PAOX), transcript variant 4, mRNA [NM_207127]	196743	GO:0052901|GO:0006805|GO:0052902|GO:0005782|GO:0052903|GO:0052904|GO:0005102|GO:0044281|GO:0046592|GO:0034641|GO:0006598|GO:0006596|GO:0052899|GO:0006595|GO:0009446|GO:0046208|GO:0046203|GO:0009447|GO:0055114	135193906	chr10	135193847	+	hs|10q26.3	NM_207127	chr10:135193847-135193906	NM_207127	Hs.501578
A_23_P432947	8.92186	3.15734	8.92186	up	2.45099	2.56596	-0.64887	-0.64887	GREM1	gremlin 1, DAN family BMP antagonist	FALSE	Homo sapiens gremlin 1, DAN family BMP antagonist (GREM1), transcript variant 1, mRNA [NM_013372]	26585	GO:0005515|GO:0030308|GO:0001658|GO:0033689|GO:0005615|GO:0060676|GO:0051973|GO:0016015|GO:0030297|GO:0007171|GO:0030199|GO:0090191|GO:0048018|GO:0009986|GO:0090291|GO:0030502|GO:0005125|GO:2000727|GO:0072331|GO:1900155|GO:0043184|GO:1900158|GO:0060173|GO:0090027|GO:0045892|GO:0042346|GO:0008284|GO:1900086|GO:0061098|GO:0002042|GO:0007267|GO:0010717|GO:0009954|GO:0030326|GO:0032872|GO:0060394|GO:…	33026134	chr15	33026075	+	hs|15q13.3	NM_013372	chr15:33026075-33026134	NM_013372	Hs.40098
A_23_P67971	2.13683	1.09547	2.13683	up	0.0440218	0.427072	-0.859925	-0.859925	GALM	galactose mutarotase (aldose 1-epimerase)	FALSE	Homo sapiens galactose mutarotase (aldose 1-epimerase) (GALM), mRNA [NM_138801]	130589	GO:0005737|GO:0004034|GO:0030246|GO:0006006|GO:0006012|GO:0070062	38961203	chr2	38961144	+	hs|2p22.1	NM_138801	chr2:38961144-38961203	NM_138801	Hs.435012
A_19_P00809728	2.16231	1.11257	2.16231	up	0.984993	0.753257	-0.243445	-0.243445	LINC00630	long intergenic non-protein coding RNA 630	FALSE	Homo sapiens long intergenic non-protein coding RNA 630 (LINC00630), long non-coding RNA [NR_038988]	100287765		102082072	chrX	102082013	+	hs|Xq22.1	NR_038988	chrX:102082013-102082072	NR_038988	Hs.687084
A_33_P3404989	2.05991	1.04258	2.05991	up	0.360233	0.627825	-0.548553	-0.548553	HIST1H3H	histone cluster 1, H3h	FALSE	Homo sapiens histone cluster 1, H3h (HIST1H3H), mRNA [NM_003536]	8357	GO:0005515|GO:0010467|GO:0046982|GO:0006325|GO:0006335|GO:0005576|GO:0005634|GO:0000228|GO:0003677|GO:0032776|GO:0043234|GO:0060968|GO:0016020|GO:0000183|GO:0007596|GO:0045814|GO:0040029|GO:0005654|GO:0000786|GO:0070062	27778314	chr6	27778255	+	hs|6p22.1	NM_003536	chr6:27778255-27778314	NM_003536	Hs.591778
A_33_P3341601	2.6085	1.38322	2.6085	up	1.55875	1.22774	0.0100262	0.0100262	WDR86	WD repeat domain 86	FALSE	Homo sapiens WD repeat domain 86 (WDR86), transcript variant 1, mRNA [NM_001284260]	349136		151078309	chr7	151078250	-	hs|7q36.1	NM_001284260	chr7:151078309-151078250	NM_001284260	Hs.647083
A_33_P3354256	2.23322	1.15913	2.23322	up	1.06197	0.912579	-0.171853	-0.171853	MTSS1	metastasis suppressor 1	FALSE	Homo sapiens metastasis suppressor 1 (MTSS1), transcript variant 1, mRNA [NM_001282971]	9788	GO:0072160|GO:0007009|GO:0005515|GO:0030036|GO:0030035|GO:0034334|GO:0050680|GO:0006928|GO:0030139|GO:0030282|GO:0015629|GO:0042802|GO:0061333|GO:0005737|GO:0051015|GO:0010960|GO:0005912|GO:0032233|GO:2001013|GO:0030041|GO:0007155|GO:0072102|GO:0005102|GO:0001726|GO:0001701|GO:0071498|GO:0003785|GO:0007169	125565128	chr8	125565069	-	hs|8q24.13	NM_001282971	chr8:125565128-125565069	NM_001282971	Hs.336994
A_24_P317907	2.34788	1.23136	2.34788	up	0.462772	0.28485	-0.857547	-0.857547	SORBS1	sorbin and SH3 domain containing 1	FALSE	Homo sapiens sorbin and SH3 domain containing 1 (SORBS1), transcript variant 3, mRNA [NM_001034954]	10580	GO:0005515|GO:0008092|GO:0008286|GO:0005886|GO:0005158|GO:0043149|GO:0005634|GO:0016363|GO:0005829|GO:0046889|GO:0005915|GO:0005737|GO:0005913|GO:0006936|GO:0015758|GO:0048041|GO:0046326|GO:0005899|GO:0005813|GO:0001725|GO:0032869|GO:0045725|GO:0019901|GO:0003779|GO:0009967|GO:0007160|GO:0005070|GO:0045121|GO:0005654|GO:0005924|GO:0005925|GO:0090004	97072614	chr10	97072555	-	hs|10q24.1	NM_001034954	chr10:97072614-97072555	NM_001034954	Hs.38621
A_33_P3221129	2.1622	1.1125	2.1622	up	0.551484	0.570553	-0.551484	-0.551484	LRRN4CL	LRRN4 C-terminal like	FALSE	Homo sapiens LRRN4 C-terminal like (LRRN4CL), mRNA [NM_203422]	221091	GO:0016021	62453945	chr11	62453886	-	hs|11q12.3	NM_203422	chr11:62453945-62453886	NM_203422	Hs.427449
A_33_P3287223	3.60266	1.84906	3.60266	up	1.39694	1.20841	-0.546389	-0.546389	DPP4	dipeptidyl-peptidase 4	FALSE	Homo sapiens dipeptidyl-peptidase 4 (DPP4), mRNA [NM_001935]	1803	GO:0005515|GO:0008284|GO:0005886|GO:0004252|GO:0031295|GO:0030139|GO:0005765|GO:0002020|GO:0010716|GO:0042803|GO:0042802|GO:0046581|GO:0016324|GO:0071438|GO:0006508|GO:0070062|GO:0001666|GO:0009986|GO:0031258|GO:0005102|GO:0033632|GO:0030027|GO:0042110|GO:0016020|GO:0043542|GO:0008236|GO:0045121|GO:0016021|GO:0008239|GO:0005925	162849045	chr2	162848986	-	hs|2q24.2	NM_001935	chr2:162849045-162848986	NM_001935	Hs.368912
A_33_P3259203	2.12276	1.08594	2.12276	up	0.749804	0.474025	-0.474025	-0.474025	TMEM255B	transmembrane protein 255B	FALSE	transmembrane protein 255B [Source:HGNC Symbol;Acc:HGNC:28297] [ENST00000375353]	348013	GO:0016021	114515195	chr13	114515136	+	hs|13q34	XM_006719983	chr13:114515136-114515195	XM_006719983
A_33_P3464855	2.14851	1.10334	2.14851	up	0.741576	0.385226	-0.539938	-0.539938	DKFZP586B0319	DKFZP586B0319 protein	FALSE	Homo sapiens mRNA; cDNA DKFZp586B0319 (from clone DKFZp586B0319) [AL050097]	26069		196858864	chr3	196858805	-	hs|3q29	AL050097	chr3:196858864-196858805		Hs.667735
A_24_P932736	2.85678	1.51439	2.85678	up	1.5087	1.0746	-0.222738	-0.222738	HMBOX1	homeobox containing 1	FALSE	homeobox containing 1 [Source:HGNC Symbol;Acc:HGNC:26137] [ENST00000397358]	79618	GO:0005515|GO:0005737|GO:0005654|GO:0005634|GO:0045893|GO:0045892|GO:0003677|GO:0006351	28910521	chr8	28910462	+	hs|8p12	XM_005273639	chr8:28910462-28910521	XM_005273639
A_32_P65616	10.825	3.4363	10.825	up	2.38126	2.20079	-1.14527	-1.14527	PRL	prolactin	FALSE	Homo sapiens prolactin (PRL), transcript variant 1, mRNA [NM_000948]	5617	GO:0005515|GO:0007565|GO:0005148|GO:0007595|GO:0005179|GO:0008283|GO:0040014|GO:0005576|GO:0060397|GO:0007166|GO:0046427	22287617	chr6	22287558	-	hs|6p22.3	NM_000948	chr6:22287617-22287558	NM_000948	Hs.1905
A_23_P208210	2.32099	1.21474	2.32099	up	0.998442	0.808235	-0.311403	-0.311403	ZNF432	zinc finger protein 432	FALSE	Homo sapiens zinc finger protein 432 (ZNF432), mRNA [NM_014650]	9668	GO:0006355|GO:0003700|GO:0005634|GO:0003677|GO:0046872|GO:0006351	52536848	chr19	52536789	-	hs|19q13.41	NM_014650	chr19:52536848-52536789	NM_014650	Hs.655934
A_33_P3418917	2.29493	1.19845	2.29493	up	0.679545	0.306519	-0.705415	-0.705415	RUSC1-AS1	RUSC1 antisense RNA 1	FALSE	Homo sapiens RUSC1 antisense RNA 1 (RUSC1-AS1), mRNA [NM_001039517]	284618		155290323	chr1	155290264	-	hs|1q22	NM_001039517	chr1:155290323-155290264	NM_001039517	Hs.650801
A_21_P0000507	2.3004	1.20189	2.3004	up	0.525418	0.218471	-0.829942	-0.829942	SNAR-B2	small ILF3/NF90-associated RNA B2	FALSE	Homo sapiens small ILF3/NF90-associated RNA B2 (SNAR-B2), small nuclear RNA [NR_024230]	100170217		50637071	chr19	50637012	-	hs|19q13.33	NR_024230	chr19:50637071-50637012	NR_024230	Hs.723095
A_24_P686965	2.17822	1.12315	2.17822	up	1.10772	0.893343	-0.122618	-0.122618	SH2D5	SH2 domain containing 5	FALSE	Homo sapiens SH2 domain containing 5 (SH2D5), transcript variant 1, mRNA [NM_001103161]	400745	GO:0030054|GO:0045211|GO:0014069	21046321	chr1	21046262	-	hs|1p36.12	NM_001103161	chr1:21046321-21046262	NM_001103161	Hs.591522
A_33_P3243405	2.24077	1.164	2.24077	up	1.12207	0.758513	-0.223704	-0.223704	GPR182	G protein-coupled receptor 182	FALSE	Homo sapiens G protein-coupled receptor 182 (GPR182), mRNA [NM_007264]	11318	GO:0007186|GO:0005886|GO:0004930|GO:0016021|GO:0007166|GO:0004888	57390378	chr12	57390319	+	hs|12q13.3	NM_007264	chr12:57390319-57390378	NM_007264	Hs.483909
A_33_P3291510	2.20023	1.13765	2.20023	up	0.649418	0.241105	-0.692391	-0.692391	VCY	variable charge, Y-linked	FALSE	Homo sapiens variable charge, Y-linked (VCY), mRNA [NM_004679]	9084		16168761	chrY	16168702	+	hs|Yq11.221	NM_004679	chrY:16168702-16168761	NM_004679	Hs.632284
A_33_P3243702	2.34678	1.23069	2.34678	up	0.533756	0.860102	-0.533756	-0.533756	KLHL30	kelch-like family member 30	FALSE	Homo sapiens kelch-like family member 30 (KLHL30), mRNA [NM_198582]	377007		239061547	chr2	239061488	+	hs|2q37.3	NM_198582	chr2:239061488-239061547	NM_198582	Hs.591595
A_33_P3270941	2.12324	1.08627	2.12324	up	-0.127159	0.150401	-1.07465	-1.07465	C1orf229	chromosome 1 open reading frame 229	FALSE	Homo sapiens chromosome 1 open reading frame 229 (C1orf229), mRNA [NM_207401]	388759		247273533	chr1	247273474	-	hs|1q44	NM_207401	chr1:247273533-247273474	NM_207401	Hs.456511
A_23_P53763	2.2619	1.17753	2.2619	up	0.944101	1.24772	-0.0816231	-0.0816231	KIAA0226L	KIAA0226-like	FALSE	Homo sapiens KIAA0226-like (KIAA0226L), transcript variant 1, mRNA [NM_025113]	80183		46918965	chr13	46918906	-	hs|13q14.13	NM_025113	chr13:46918965-46918906	NM_025113	Hs.98117
A_23_P118842	2.15448	1.10734	2.15448	up	1.30372	1.20979	0.14942	0.14942	KRTAP1-5	keratin associated protein 1-5	FALSE	Homo sapiens keratin associated protein 1-5 (KRTAP1-5), mRNA [NM_031957]	83895	GO:0008150|GO:0003674|GO:0005575|GO:0045095	39182367	chr17	39182308	-	hs|17q21.2	NM_031957	chr17:39182367-39182308	NM_031957	Hs.534499
A_19_P00803697	2.33168	1.22137	2.33168	up	-0.293056	-0.271692	-1.50374	-1.50374	lnc-EMX2-1	lnc-EMX2-1:2	FALSE	LNCipedia lincRNA (lnc-EMX2-1), lincRNA [lnc-EMX2-1:2]			119250252	chr10	119250193	+	hs|10q26.11		chr10:119250193-119250252
A_23_P312358	2.08288	1.05858	2.08288	up	0.200068	0.0443287	-0.936379	-0.936379	BEND7	BEN domain containing 7	FALSE	Homo sapiens BEN domain containing 7 (BEND7), transcript variant 1, mRNA [NM_152751]	222389	GO:0005515|GO:0070062	13522938	chr10	13494639	-	hs|10p13	NM_152751	chr10:13522938-13494639	NM_152751	Hs.498740
A_21_P0006277	2.04581	1.03267	2.04581	up	0.105435	-0.105435	-1.03267	-1.03267	lnc-ALDH1A1-3	lnc-ALDH1A1-3:1	FALSE	LNCipedia lincRNA (lnc-ALDH1A1-3), lincRNA [lnc-ALDH1A1-3:1]			75797293	chr9	75797234	-	hs|9q21.13		chr9:75797293-75797234
A_21_P0000513	2.71711	1.44207	2.71711	up	0.682745	0.361084	-0.920157	-0.920157	VTRNA1-1	vault RNA 1-1	FALSE	Homo sapiens vault RNA 1-1 (VTRNA1-1), vault RNA [NR_026703]	56664		140090935	chr5	140090876	+	hs|5q31.3	NR_026703	chr5:140090876-140090935	NR_026703	Hs.543888
A_23_P111657	2.10453	1.0735	2.10453	up	-0.742503	-0.862551	-1.87603	-1.87603	SHH	sonic hedgehog	FALSE	Homo sapiens sonic hedgehog (SHH), mRNA [NM_000193]	6469	GO:0005515|GO:0001656|GO:0007389|GO:0001658|GO:0001755|GO:0030010|GO:0030878|GO:0007228|GO:0009790|GO:0005615|GO:0005113|GO:0031069|GO:0007224|GO:0007405|GO:0030162|GO:0021794|GO:0001947|GO:0007507|GO:0009880|GO:0030539|GO:0016015|GO:0001948|GO:0003140|GO:0007411|GO:0006508|GO:0016539|GO:0002320|GO:0033077|GO:0030336|GO:0014902|GO:0001708|GO:0009986|GO:0021938|GO:0005509|GO:0021978|GO:0000122|GO:…	155595960	chr7	155595901	-	hs|7q36.3	NM_000193	chr7:155595960-155595901	NM_000193	Hs.164537
A_32_P213831	2.25404	1.17251	2.25404	up	0.837606	1.00943	-0.248992	-0.248992	STRIP2	striatin interacting protein 2	FALSE	Homo sapiens striatin interacting protein 2 (STRIP2), transcript variant 1, mRNA [NM_020704]	57464	GO:0003674|GO:0005737|GO:0016477|GO:0008360|GO:0007010	129122780	chr7	129122721	+	hs|7q32.1	NM_020704	chr7:129122721-129122780	NM_020704	Hs.489988
A_33_P3241984	2.25789	1.17498	2.25789	up	0.203869	0.0492985	-1.04839	-1.04839	PTPN22	protein tyrosine phosphatase, non-receptor type 22 (lymphoid)	FALSE	Homo sapiens protein tyrosine phosphatase, non-receptor type 22 (lymphoid) (PTPN22), transcript variant 1, mRNA [NM_015967]	26191	GO:0005515|GO:0050855|GO:0048471|GO:0017124|GO:0050868|GO:0005634|GO:0050860|GO:0032817|GO:0035335|GO:0005737|GO:0006470|GO:0030217|GO:0045088|GO:0009898|GO:0019900|GO:0004725|GO:0035644	114356520	chr1	114356461	-	hs|1p13.2	NM_015967	chr1:114356520-114356461	NM_015967	Hs.535276

## Sheet: Supplement table 2 Down genes 
Supplementary table 2. Downregulated genes in hBMSCs treated with BMS‐833923 compared to DMSO on day 10 of osteoblastic differentiation.
ProbeName	FC ([BMS‐833923] vs [DMSO])	Log FC ([BMS‐833923] vs [DMSO])	FC (abs) ([BMS‐833923] vs [DMSO])	Regulation ([BMS‐833923] vs [DMSO])	BMS‐833923_OS_D10_2_US10493856_253949447891_S01_GE1_1100_Jul11_2_4.txt:gProcessedSignal(normalized)	BMS‐833923_OS_D10_1_US10493856_253949447891_S01_GE1_1100_Jul11_2_3.txt:gProcessedSignal(normalized)	DMSO_OS_D10_1_2_US10493856_253949447891_S01_GE1_1100_Jul11_1_1.txt:gProcessedSignal(normalized)	DMSO_OS_D10_1_US10493856_253949447891_S01_GE1_1100_Jul11_1_1.txt:gProcessedSignal(normalized)	GeneSymbol	GeneName	ControlType	Description	EntrezGeneID	Go	Chromosome End Index_Avadis_	Chromosome Number_Avadis_	Chromosome Start Index_Avadis_	Chromosome Strand_Avadis_	Cytoband	GenbankAccession	GenomicCoordinates	RefSeqAccession	UniGeneID
A_33_P3246448	-2.04298	-1.03068	2.04298	down	-0.894137	-1.16721	0	0	KCNE4	potassium channel, voltage gated subfamily E regulatory beta subunit 4	FALSE	Homo sapiens potassium channel, voltage gated subfamily E regulatory beta subunit 4 (KCNE4), mRNA [NM_080671]	23704	GO:0016324|GO:0005249|GO:0034765|GO:0016021|GO:0071805	223920256	chr2	223920197	+	hs|2q36.1	NM_080671	chr2:223920197-223920256	NM_080671	Hs.348522
A_33_P3238290	-2.93534	-1.55353	2.93534	down	-1.42804	-1.53203	0.0734925	0.0734925	FAM65C	family with sequence similarity 65, member C	FALSE	Homo sapiens family with sequence similarity 65, member C (FAM65C), transcript variant 2, mRNA [NM_001290268]	140876		49202794	chr20	49202735	-	hs|20q13.13	NM_001290268	chr20:49202794-49202735	NM_001290268	Hs.372578
A_23_P89431	-2.53259	-1.34061	2.53259	down	-0.496766	-0.772421	0.706021	0.706021	CCL2	chemokine (C-C motif) ligand 2	FALSE	Homo sapiens chemokine (C-C motif) ligand 2 (CCL2), mRNA [NM_002982]	6347	GO:0009408|GO:0035684|GO:0008360|GO:0019221|GO:0045202|GO:0005615|GO:0030968|GO:0043524|GO:0006935|GO:0000165|GO:0044299|GO:0031727|GO:0009887|GO:0007179|GO:0031663|GO:0010332|GO:0046677|GO:0005791|GO:0008009|GO:0032869|GO:0036006|GO:0032760|GO:0002523|GO:0007568|GO:0030593|GO:0033552|GO:0032967|GO:0007186|GO:0007187|GO:0043491|GO:0032570|GO:0010759|GO:0006987|GO:0044267|GO:0045471|GO:0031100|GO:…	32584109	chr17	32584050	+	hs|17q12	NM_002982	chr17:32584050-32584109	NM_002982	Hs.303649
A_21_P0012249	-7.74477	-2.95322	7.74477	down	-0.796992	-0.795599	2.15693	2.15693			FALSE				20300567	chr22	20300432	+	hs|22q11.21		chr22:20300432-20300567
A_33_P3330264	-5.33884	-2.41653	5.33884	down	-0.015861	0.00477409	2.41098	2.41098	CXCL1	chemokine (C-X-C motif) ligand 1 (melanoma growth stimulating activity, alpha)	FALSE	Homo sapiens chemokine (C-X-C motif) ligand 1 (melanoma growth stimulating activity, alpha) (CXCL1), transcript variant 1, mRNA [NM_001511]	2919	GO:0008009|GO:0070098|GO:0030036|GO:0008285|GO:0008283|GO:0005102|GO:0005576|GO:0045236|GO:0043085|GO:0005615|GO:0002690|GO:0007399|GO:0035556|GO:0007165|GO:0006955|GO:0006954|GO:0006935|GO:0007186|GO:0060326|GO:0032496|GO:0008047|GO:0008083	74735705	chr4	74735646	+	hs|4q13.3	NM_001511	chr4:74735646-74735705	NM_001511	Hs.789
A_23_P169819	-2.70959	-1.43807	2.70959	down	-0.777265	-1.24968	0.424601	0.424601	EPHA3	EPH receptor A3	FALSE	Homo sapiens EPH receptor A3 (EPHA3), transcript variant 1, mRNA [NM_005233]	2042	GO:0005515|GO:0048013|GO:0005886|GO:0071300|GO:0010717|GO:0005576|GO:0018108|GO:0051893|GO:0005524|GO:0070507|GO:0005004|GO:0016477|GO:0005887|GO:0007411|GO:0032956|GO:0010976|GO:0032319|GO:0007155|GO:0097156|GO:0097155|GO:0005769	89530920	chr3	89530861	+	hs|3p11.1	NM_005233	chr3:89530861-89530920	NM_005233	Hs.123642
A_23_P113748	-2.6059	-1.38178	2.6059	down	-0.357744	-0.235809	1.085	1.085	ZNF385D	zinc finger protein 385D	FALSE	Homo sapiens zinc finger protein 385D (ZNF385D), mRNA [NM_024697]	79750	GO:0008270|GO:0005634|GO:0003676	21478580	chr3	21478521	-	hs|3p24.3	NM_024697	chr3:21478580-21478521	NM_024697	Hs.21026
A_19_P00318593	-3.16643	-1.66286	3.16643	down	-2.08679	-2.21987	-0.490476	-0.490476	LOC101928858	uncharacterized LOC101928858	FALSE	PREDICTED: Homo sapiens uncharacterized LOC101928858 (RP11-434D9.1), transcript variant X3, ncRNA [XR_427726]	101928858		67100990	chr5	67100931	+	hs|5q13.1	XR_427726	chr5:67100931-67100990	XR_427726
A_24_P262127	-3.56504	-1.83392	3.56504	down	0.0264225	0.544334	2.1193	2.1193	RRAD	Ras-related associated with diabetes	FALSE	Homo sapiens Ras-related associated with diabetes (RRAD), transcript variant 2, mRNA [NM_004165]	6236	GO:0006184|GO:0005515|GO:0005516|GO:0005886|GO:0007264|GO:0003924|GO:0005525	66956234	chr16	66956175	-	hs|16q22.1	NM_004165	chr16:66956234-66956175	NM_004165	Hs.1027
A_21_P0000109	-5.00441	-2.3232	5.00441	down	-2.11513	-2.57003	-0.019381	-0.019381	MTRNR2L9	MT-RNR2-like 9 (pseudogene)	FALSE	Homo sapiens MT-RNR2-like 9 (pseudogene) (MTRNR2L9), mRNA [NM_001190706]	100463487	GO:0005737|GO:0005576	62284530	chr6	62284471	+	hs|6q11.1	NM_001190706	chr6:62284471-62284530	NM_001190706
A_33_P3375576	-2.05331	-1.03795	2.05331	down	0.133234	-0.133234	1.03795	1.03795	MAP7	microtubule-associated protein 7	FALSE	Homo sapiens microtubule-associated protein 7 (MAP7), transcript variant 4, mRNA [NM_003980]	9053	GO:0016323|GO:0048471|GO:0005737|GO:0007163|GO:0005198|GO:0005875|GO:0015630|GO:0005874|GO:0005102|GO:0000226|GO:0006970|GO:0072659	136667095	chr6	136667036	-	hs|6q23.3	NM_003980	chr6:136667095-136667036	NM_003980	Hs.486548
A_33_P3841819	-2.04121	-1.02942	2.04121	down	-0.0451014	-0.0507128	0.981515	0.981515	THUMPD3-AS1	THUMPD3 antisense RNA 1	FALSE	Homo sapiens THUMPD3 antisense RNA 1 (THUMPD3-AS1), long non-coding RNA [NR_027007]	440944		9431671	chr3	9431612	-	hs|3p25.3	NR_027007	chr3:9431671-9431612	NR_027007	Hs.598958
A_21_P0013918	-4.23557	-2.08256	4.23557	down	-1.21287	-1.04132	0.955461	0.955461			FALSE	HUMGLIA1F glial factor-1 {Homo sapiens} (exp=-1; wgp=0; cg=0), partial (5%) [THC2619931]			90033322	chr4	90033263	+	hs|4q22.1		chr4:90033263-90033322
A_19_P00810529	-2.37678	-1.24901	2.37678	down	-0.541327	-0.87404	0.541327	0.541327	LINC00310	long intergenic non-protein coding RNA 310	FALSE	Homo sapiens long intergenic non-protein coding RNA 310 (LINC00310), transcript variant 2, long non-coding RNA [NR_027267]	114036		35555425	chr21	35555366	+	hs|21q22.11	NR_027267	chr21:35555366-35555425	NR_027267	Hs.720230
A_33_P3268868	-2.05151	-1.03669	2.05151	down	0.00271988	-0.198168	0.938962	0.938962			FALSE				143738162	chr1	143738103	-	hs|1q21.1		chr1:143738162-143738103
A_33_P3240787	-2.04464	-1.03185	2.04464	down	-1.21533	-0.867849	-0.0097456	-0.0097456	LOC100131910	uncharacterized LOC100131910	FALSE	Homo sapiens cDNA FLJ27192 fis, clone SYN02553. [AK130702]	100131910		141045713	chr8	141045654	-	hs|8q24.3	AK130702	chr8:141045713-141045654		Hs.689306
A_23_P69497	-2.40876	-1.26829	2.40876	down	-1.87375	-2.20374	-0.770457	-0.770457	CLEC3B	C-type lectin domain family 3, member B	FALSE	Homo sapiens C-type lectin domain family 3, member B (CLEC3B), mRNA [NM_003278]	7123	GO:0001652|GO:0071310|GO:0005509|GO:0071560|GO:0005576|GO:0030282|GO:0005615|GO:0031012|GO:0001501|GO:0005737|GO:0001503|GO:0010756|GO:0030246|GO:0008201|GO:0070062|GO:0036143	45077561	chr3	45077502	+	hs|3p21.31	NM_003278	chr3:45077502-45077561	NM_003278	Hs.476092
A_23_P17065	-3.54701	-1.8266	3.54701	down	0.0761383	-0.0553892	1.83698	1.83698	CCL20	chemokine (C-C motif) ligand 20	FALSE	Homo sapiens chemokine (C-C motif) ligand 20 (CCL20), transcript variant 1, mRNA [NM_004591]	6364	GO:0005515|GO:0008009|GO:2000406|GO:0007267|GO:0050726|GO:0005576|GO:0005615|GO:0007165|GO:0071223|GO:0006955|GO:0071222|GO:0006954|GO:0006935|GO:0060326|GO:0042060|GO:0051770|GO:0042742	228681836	chr2	228681100	+	hs|2q36.3	NM_004591	chr2:228681100-228681836	NM_004591	Hs.75498
A_33_P3417589	-2.90648	-1.53927	2.90648	down	-0.460996	-0.335712	1.14092	1.14092			FALSE	keratin 8 pseudogene 44 [Source:HGNC Symbol;Acc:HGNC:39878] [ENST00000441609]			162990760	chr6	162990701	+	hs|6q26		chr6:162990701-162990760
A_24_P238118	-2.14664	-1.10208	2.14664	down	-0.900778	-0.757334	0.273024	0.273024	PP12613	uncharacterized LOC100192379	FALSE	Homo sapiens uncharacterized LOC100192379 (PP12613), long non-coding RNA [NR_024365]	100192379		122687861	chr4	122687802	+	hs|4q27	NR_024365	chr4:122687802-122687861	NR_024365	Hs.607691
A_23_P165624	-2.07769	-1.05498	2.07769	down	0.469191	0.269286	1.42422	1.42422	TNFAIP6	tumor necrosis factor, alpha-induced protein 6	FALSE	Homo sapiens tumor necrosis factor, alpha-induced protein 6 (TNFAIP6), mRNA [NM_007115]	7130	GO:0007165|GO:0030335|GO:0006954|GO:0005540|GO:0007267|GO:0007155|GO:0005615|GO:0030728	152226654	chr2	152226595	+	hs|2q23.3	NM_007115	chr2:152226595-152226654	NM_007115	Hs.437322
A_33_P3299066	-2.78372	-1.47701	2.78372	down	-0.261398	-0.184921	1.25385	1.25385	NR4A2	nuclear receptor subfamily 4, group A, member 2	FALSE	Homo sapiens nuclear receptor subfamily 4, group A, member 2 (NR4A2), mRNA [NM_006186]	4929	GO:0005515|GO:0008344|GO:0010467|GO:0021986|GO:0006367|GO:0003707|GO:0016265|GO:0005634|GO:0009791|GO:0042053|GO:0042416|GO:0043576|GO:0043524|GO:0005737|GO:0010035|GO:0045944|GO:0031668|GO:0043401|GO:0004879|GO:0001666|GO:0046982|GO:0042551|GO:0021952|GO:0051866|GO:0043085|GO:0001228|GO:0000979|GO:0006351|GO:0007165|GO:0001975|GO:0071542|GO:0005654|GO:0008270|GO:0017085|GO:0034599|GO:0001764|GO:…	157182315	chr2	157182256	-	hs|2q24.1	NM_006186	chr2:157182315-157182256	NM_006186	Hs.563344
A_33_P3363271	-4.18298	-2.06453	4.18298	down	-1.59026	-1.56523	0.486785	0.486785	CACNB2	calcium channel, voltage-dependent, beta 2 subunit	FALSE	Homo sapiens calcium channel, voltage-dependent, beta 2 subunit (CACNB2), transcript variant 1, mRNA [NM_000724]	783	GO:0005515|GO:0005262|GO:0005245|GO:0051928|GO:0007268|GO:0008331|GO:0005891|GO:0042383|GO:0070509|GO:0005887|GO:0007411|GO:0007528|GO:0070588|GO:0006810|GO:0007601	18829968	chr10	18829909	+	hs|10p12.31	NM_000724	chr10:18829909-18829968	NM_000724	Hs.59093
A_21_P0013104	-2.85418	-1.51308	2.85418	down	-0.554095	-0.0863502	1.19285	1.19285	XLOC_l2_013149		FALSE	BROAD Institute lincRNA (XLOC_l2_013149), lincRNA [TCONS_l2_00024954]			143360287	chr6	143360228	-	hs|6q24.2		chr6:143360287-143360228
A_21_P0001833	-2.64249	-1.4019	2.64249	down	-0.813104	-0.608539	0.691075	0.691075			FALSE	601153288F1 NIH_MGC_19 Homo sapiens cDNA clone IMAGE:3509612 5', mRNA sequence [BE313630]			16385485	chr2	16385426	+	hs|2p24.3		chr2:16385426-16385485		Hs.580469
A_23_P131208	-3.10662	-1.63535	3.10662	down	-0.0923703	-0.338794	1.41977	1.41977	NR4A2	nuclear receptor subfamily 4, group A, member 2	FALSE	Homo sapiens nuclear receptor subfamily 4, group A, member 2 (NR4A2), mRNA [NM_006186]	4929	GO:0005515|GO:0008344|GO:0010467|GO:0021986|GO:0006367|GO:0003707|GO:0016265|GO:0005634|GO:0009791|GO:0042053|GO:0042416|GO:0043576|GO:0043524|GO:0005737|GO:0010035|GO:0045944|GO:0031668|GO:0043401|GO:0004879|GO:0001666|GO:0046982|GO:0042551|GO:0021952|GO:0051866|GO:0043085|GO:0001228|GO:0000979|GO:0006351|GO:0007165|GO:0001975|GO:0071542|GO:0005654|GO:0008270|GO:0017085|GO:0034599|GO:0001764|GO:…	157181786	chr2	157181727	-	hs|2q24.1	NM_006186	chr2:157181786-157181727	NM_006186	Hs.563344
A_24_P335092	-2.01084	-1.0078	2.01084	down	-0.502515	-0.508057	0.502515	0.502515	SAA1	serum amyloid A1	FALSE	Homo sapiens serum amyloid A1 (SAA1), transcript variant 1, mRNA [NM_000331]	6288	GO:0001664|GO:0030593|GO:0030168|GO:0050716|GO:0005576|GO:0050715|GO:0006953|GO:0007204|GO:0006898|GO:0045785|GO:0034364|GO:0071682|GO:0050728|GO:0045087|GO:0050708|GO:0048247|GO:0048246|GO:0008201|GO:0070062	18291310	chr11	18290868	+	hs|11p15.1	NM_000331	chr11:18290868-18291310	NM_000331	Hs.632144
A_23_P114084	-2.69473	-1.43014	2.69473	down	-0.622438	-0.992961	0.622438	0.622438	PHEX	phosphate regulating endopeptidase homolog, X-linked	FALSE	Homo sapiens phosphate regulating endopeptidase homolog, X-linked (PHEX), transcript variant 1, mRNA [NM_000444]	5251	GO:0048471|GO:0005794|GO:0005886|GO:0005783|GO:0007267|GO:0030282|GO:0001501|GO:0005887|GO:0004177|GO:0006508|GO:0008270|GO:0019637|GO:0004222|GO:0006464	22266243	chrX	22266184	+	hs|Xp22.11	NM_000444	chrX:22266184-22266243	NM_000444	Hs.495834
A_33_P3361636	-2.22192	-1.1518	2.22192	down	-1.34555	-1.36958	-0.20576	-0.20576	MGP	matrix Gla protein	FALSE	Homo sapiens matrix Gla protein (MGP), transcript variant 1, mRNA [NM_001190839]	4256	GO:0031012|GO:0005515|GO:0030500|GO:0001503|GO:0001502|GO:0005509|GO:0005578|GO:0008147|GO:0030154|GO:0070062|GO:0005201	15034886	chr12	15034827	-	hs|12p12.3	NM_001190839	chr12:15034886-15034827	NM_001190839	Hs.365706
A_23_P106002	-2.57138	-1.36254	2.57138	down	-0.316383	-0.497262	0.955722	0.955722	NFKBIA	nuclear factor of kappa light polypeptide gene enhancer in B-cells inhibitor, alpha	FALSE	Homo sapiens nuclear factor of kappa light polypeptide gene enhancer in B-cells inhibitor, alpha (NFKBIA), mRNA [NM_020529]	4792	GO:0005515|GO:0042994|GO:0032403|GO:0042802|GO:0002756|GO:0031072|GO:0002755|GO:0042127|GO:0031663|GO:0031625|GO:0000060|GO:0033256|GO:0045746|GO:0038124|GO:0010745|GO:0038123|GO:0034134|GO:0070431|GO:0002224|GO:0043392|GO:0032270|GO:0045087|GO:0008139|GO:0034166|GO:0035666|GO:0019899|GO:0034162|GO:0038095|GO:0008134|GO:0042345|GO:0050852|GO:0034142|GO:0005886|GO:0005634|GO:0070427|GO:0010875|GO:…	35870847	chr14	35870788	-	hs|14q13.2	NM_020529	chr14:35870847-35870788	NM_020529	Hs.81328
A_23_P204286	-2.37005	-1.24492	2.37005	down	-1.32316	-1.5944	-0.213865	-0.213865	MGP	matrix Gla protein	FALSE	Homo sapiens matrix Gla protein (MGP), transcript variant 2, mRNA [NM_000900]	4256	GO:0031012|GO:0005515|GO:0030500|GO:0001503|GO:0001502|GO:0005509|GO:0005578|GO:0008147|GO:0030154|GO:0070062|GO:0005201	15034999	chr12	15034940	-	hs|12p12.3	NM_000900	chr12:15034999-15034940	NM_000900	Hs.365706
A_21_P0012313	-3.07422	-1.62022	3.07422	down	-1.58384	-1.54132	0.0576425	0.0576425	PRODH	proline dehydrogenase (oxidase) 1	FALSE	proline dehydrogenase (oxidase) 1 [Source:HGNC Symbol;Acc:HGNC:9453] [ENST00000609229]	5625	GO:0071949|GO:0034641|GO:0019470|GO:0006560|GO:0005759|GO:0010133|GO:0008631|GO:0006562|GO:0005743|GO:0004657|GO:0044281|GO:0055114	18902109	chr22	18902050	-	hs|22q11.21		chr22:18902109-18902050		Hs.613849
A_33_P3366156	-4.0767	-2.0274	4.0767	down	-1.65857	-0.994634	0.700802	0.700802	SPATA9	spermatogenesis associated 9	FALSE	Homo sapiens spermatogenesis associated 9 (SPATA9), transcript variant 1, mRNA [NM_031952]	83890	GO:0007275|GO:0016021|GO:0007283|GO:0030154	95011204	chr5	95011145	-	hs|5q15	NM_031952	chr5:95011204-95011145	NM_031952	Hs.50499
A_33_P3315470	-2.6343	-1.39742	2.6343	down	-1.39789	-1.07478	0.161082	0.161082	LINC01018	long intergenic non-protein coding RNA 1018	FALSE	Homo sapiens long intergenic non-protein coding RNA 1018 (LINC01018), transcript variant 1, long non-coding RNA [NR_024424]	255167		6588424	chr5	6588365	+	hs|5p15.31	NR_024424	chr5:6588365-6588424	NR_024424	Hs.435515
A_23_P405707	-2.60025	-1.37865	2.60025	down	0.330188	0.151728	1.61961	1.61961	BCOR	BCL6 corepressor	FALSE	BCL6 corepressor [Source:HGNC Symbol;Acc:HGNC:20893] [ENST00000615339]	54880	GO:0005515|GO:0031519|GO:0035518|GO:0000415|GO:0004842|GO:0044212|GO:0042826|GO:0003714|GO:0070171|GO:0005634|GO:0000122|GO:0030502|GO:0065001|GO:0006351|GO:0007507|GO:0031072|GO:0051572|GO:0042476|GO:0060021|GO:0045892|GO:0008134	39931331	chrX	39931272	-	hs|Xp11.4	BC128456	chrX:39931331-39931272		Hs.659681
A_33_P3281358	-3.75943	-1.91051	3.75943	down	-0.284876	0.161867	1.84901	1.84901	ARF3	ADP-ribosylation factor 3	FALSE	ADP-ribosylation factor 3 [Source:HGNC Symbol;Acc:HGNC:654] [ENST00000472621]	377	GO:0048471|GO:0006661|GO:0000139|GO:0007264|GO:0003924|GO:0044281|GO:0016192|GO:0015031|GO:0006644|GO:0005525|GO:0070062	49349994	chr12	49349935	-	hs|12q13.12	XM_005268856	chr12:49349994-49349935	XM_005268856	Hs.733776
A_33_P3334803	-2.88311	-1.52763	2.88311	down	-1.43872	-1.61653	0	0	ANTXRL	anthrax toxin receptor-like	FALSE	PREDICTED: Homo sapiens anthrax toxin receptor-like (ANTXRL), misc_RNA [XR_159158]	195977	GO:0004872|GO:0016021|GO:0046872	47680196	chr10	47680137	+	hs|10q11.22	XR_159158	chr10:47680137-47680196		Hs.538515
A_33_P3394793	-3.2322	-1.69252	3.2322	down	-0.0333049	0.0333049	1.69252	1.69252	SUSD2	sushi domain containing 2	FALSE	Homo sapiens sushi domain containing 2 (SUSD2), mRNA [NM_019601]	56241	GO:0005515|GO:0006955|GO:0005886|GO:0030247|GO:0016021|GO:0006898|GO:0070062|GO:0005044	24580902	chr22	24580843	+	hs|22q11.23	NM_019601	chr22:24580843-24580902	NM_019601	Hs.131819
A_33_P3390207	-4.09282	-2.03309	4.09282	down	-1.27222	-0.752003	1.02098	1.02098	TMEM155	transmembrane protein 155	FALSE	Homo sapiens transmembrane protein 155 (TMEM155), mRNA [NM_152399]	132332	GO:0005576	122680578	chr4	122680519	-	hs|4q27	NM_152399	chr4:122680578-122680519	NM_152399	Hs.27524
A_33_P3338341	-5.40569	-2.43448	5.40569	down	-2.55095	-2.71795	-0.199974	-0.199974	PRODH	proline dehydrogenase (oxidase) 1	FALSE	Homo sapiens proline dehydrogenase (oxidase) 1 (PRODH), transcript variant 1, mRNA [NM_016335]	5625	GO:0071949|GO:0034641|GO:0019470|GO:0006560|GO:0005759|GO:0010133|GO:0008631|GO:0006562|GO:0005743|GO:0004657|GO:0044281|GO:0055114	18900497	chr22	18900438	-	hs|22q11.21	NM_016335	chr22:18900497-18900438	NM_016335	Hs.517352
A_33_P3407235	-2.2102	-1.14418	2.2102	down	-1.50795	-1.54468	-0.382137	-0.382137			FALSE				73351775	chrX	73351716	+	hs|Xq13.2		chrX:073351716-073351775
A_23_P212089	-2.0174	-1.0125	2.0174	down	-0.207798	-0.24013	0.788535	0.788535	NFKBIZ	nuclear factor of kappa light polypeptide gene enhancer in B-cells inhibitor, zeta	FALSE	Homo sapiens nuclear factor of kappa light polypeptide gene enhancer in B-cells inhibitor, zeta (NFKBIZ), transcript variant 1, mRNA [NM_031419]	64332	GO:0003712|GO:0006954|GO:0006357|GO:0005634|GO:0006351	101578963	chr3	101578904	+	hs|3q12.3	NM_031419	chr3:101578904-101578963	NM_031419	Hs.319171
A_33_P3549091	-2.98989	-1.58009	2.98989	down	-1.33815	-1.30908	0.256478	0.256478	LOC100131347	RAD52 motif containing 1 pseudogene	FALSE	Homo sapiens RAD52 motif containing 1 pseudogene (LOC100131347), non-coding RNA [NR_036551]	100131347		37237586	chr17	37237527	+	hs|17q12	NR_036551	chr17:37237527-37237586	NR_036551	Hs.676510
A_21_P0000389	-2.17193	-1.11898	2.17193	down	-0.370476	-0.434588	0.716445	0.716445	SNORD91B	small nucleolar RNA, C/D box 91B	FALSE	Homo sapiens small nucleolar RNA, C/D box 91B (SNORD91B), small nucleolar RNA [NR_003073]	692208		2232478	chr17	2232419	-	hs|17p13.3	NR_003073	chr17:2232478-2232419	NR_003073
A_33_P3213822	-2.00155	-1.00112	2.00155	down	-0.944217	-1.00764	0.0251915	0.0251915	KCNK2	potassium channel, two pore domain subfamily K, member 2	FALSE	Homo sapiens potassium channel, two pore domain subfamily K, member 2 (KCNK2), transcript variant 1, mRNA [NM_001017424]	3776	GO:0015271|GO:0007186|GO:0005886|GO:0005783|GO:0008076|GO:0042391|GO:0019870|GO:0005789|GO:0007268|GO:0034765|GO:0022841|GO:0071805	215410411	chr1	215410352	+	hs|1q41	NM_001017424	chr1:215410352-215410411	NM_001017424	Hs.497745
A_23_P110253	-2.18445	-1.12727	2.18445	down	-0.600944	-0.701965	0.475816	0.475816	KIT	v-kit Hardy-Zuckerman 4 feline sarcoma viral oncogene homolog	FALSE	Homo sapiens v-kit Hardy-Zuckerman 4 feline sarcoma viral oncogene homolog (KIT), transcript variant 1, mRNA [NM_000222]	3815	GO:0005515|GO:0008360|GO:0019221|GO:0007286|GO:0007283|GO:0002020|GO:0005615|GO:0042803|GO:0035234|GO:0043069|GO:0043552|GO:0007173|GO:0042127|GO:0031274|GO:0002327|GO:0038162|GO:0023014|GO:0002320|GO:0043303|GO:0030335|GO:0006687|GO:0031532|GO:0032762|GO:0014068|GO:0018108|GO:0035855|GO:0019955|GO:0008543|GO:0045087|GO:0008542|GO:0038093|GO:0002371|GO:0009898|GO:0002318|GO:0038095|GO:0009897|GO:…	55606570	chr4	55606511	+	hs|4q12	NM_000222	chr4:55606511-55606570	NM_000222	Hs.479754
A_23_P120594	-2.42068	-1.27541	2.42068	down	-1.74359	-1.69843	-0.445595	-0.445595	ACSS1	acyl-CoA synthetase short-chain family member 1	FALSE	Homo sapiens acyl-CoA synthetase short-chain family member 1 (ACSS1), transcript variant 1, mRNA [NM_032501]	84532	GO:0005515|GO:0006805|GO:0016208|GO:0019542|GO:0006069|GO:0005759|GO:0019427|GO:0019413|GO:0044281|GO:0003987|GO:0006085|GO:0005524	24987088	chr20	24987029	-	hs|20p11.21	NM_032501	chr20:24987088-24987029	NM_032501	Hs.529353
A_24_P208436	-2.06312	-1.04483	2.06312	down	-1.15094	-1.147	-0.104141	-0.104141	PDE1A	phosphodiesterase 1A, calmodulin-dependent	FALSE	Homo sapiens phosphodiesterase 1A, calmodulin-dependent (PDE1A), transcript variant 2, mRNA [NM_001003683]	5136	GO:0005516|GO:0048011|GO:0048101|GO:0004115|GO:0004117|GO:0046069|GO:0005634|GO:0007202|GO:0048660|GO:0046872|GO:0005829|GO:0007165|GO:0007173|GO:0030553|GO:0007596|GO:0008543|GO:0034391|GO:0045087|GO:0043025|GO:0006198	183050773	chr2	183050714	-	hs|2q32.1	NM_001003683	chr2:183050773-183050714	NM_001003683	Hs.191046
A_24_P257416	-7.5047	-2.90779	7.5047	down	-0.0109329	0.0109329	2.90779	2.90779	CXCL2	chemokine (C-X-C motif) ligand 2	FALSE	Homo sapiens chemokine (C-X-C motif) ligand 2 (CXCL2), mRNA [NM_002089]	2920	GO:0005515|GO:0008009|GO:0070098|GO:0002237|GO:0005576|GO:0045236|GO:0005615|GO:0002690|GO:0006955|GO:0006954|GO:0006935|GO:0007186|GO:0060326|GO:0042127|GO:0032496	74964401	chr4	74964342	-	hs|4q13.3	NM_002089	chr4:74964401-74964342	NM_002089	Hs.75765
A_23_P15876	-2.47197	-1.30566	2.47197	down	-0.625762	-0.396558	0.794503	0.794503	ALPK2	alpha-kinase 2	FALSE	Homo sapiens alpha-kinase 2 (ALPK2), mRNA [NM_052947]	115701	GO:0004674|GO:0006468|GO:0005654|GO:0005524	56148827	chr18	56148768	-	hs|18q21.31	NM_052947	chr18:56148827-56148768	NM_052947	Hs.628152
A_23_P114713	-2.71968	-1.44344	2.71968	down	-2.2297	-2.15638	-0.749599	-0.749599	CYP4B1	cytochrome P450, family 4, subfamily B, polypeptide 1	FALSE	Homo sapiens cytochrome P450, family 4, subfamily B, polypeptide 1 (CYP4B1), transcript variant 2, mRNA [NM_000779]	1580	GO:0006805|GO:0005506|GO:0070330|GO:0018879|GO:0044281|GO:0019825|GO:0042738|GO:0008144|GO:0018585|GO:0018917|GO:0005789|GO:0020037|GO:0055114	47284815	chr1	47284756	+	hs|1p33	NM_000779	chr1:47284756-47284815	NM_000779	Hs.436317
A_32_P83845	-2.90435	-1.53821	2.90435	down	-0.934649	-0.902208	0.619785	0.619785	HEY1	hes-related family bHLH transcription factor with YRPW motif 1	FALSE	Homo sapiens hes-related family bHLH transcription factor with YRPW motif 1 (HEY1), transcript variant 2, mRNA [NM_001040708]	23462	GO:0005515|GO:0000988|GO:2001212|GO:0035912|GO:0003700|GO:0000983|GO:0006366|GO:0003184|GO:0005634|GO:2000678|GO:0060317|GO:0061314|GO:0005737|GO:0007219|GO:0009948|GO:0045944|GO:0003222|GO:0060716|GO:0046983|GO:2000820|GO:0045746|GO:0003199|GO:0003198|GO:0060412|GO:0060411|GO:0060842|GO:0003203|GO:0001525|GO:0000122|GO:0003208|GO:0003190|GO:0035939|GO:0071385|GO:0060347|GO:0045669|GO:0002076|GO:…	80676371	chr8	80676312	-	hs|8q21.13	NM_001040708	chr8:80676371-80676312	NM_001040708	Hs.234434
A_21_P0000813	-6.2075	-2.63401	6.2075	down	-1.76685	-1.93554	0.78282	0.78282	APELA	apelin receptor early endogenous ligand	FALSE	Homo sapiens apelin receptor early endogenous ligand (APELA), mRNA [NM_001297550]	100506013	GO:0007507|GO:0090134|GO:0090133|GO:0007492|GO:0005179|GO:0060183|GO:0005576|GO:0005615|GO:0031704	165818465	chr4	165818406	+	hs|4q32.3	NM_001297550	chr4:165818406-165818465	NM_001297550	Hs.105196
A_33_P3226832	-3.67232	-1.87669	3.67232	down	-0.155044	-0.816293	1.39102	1.39102	F3	coagulation factor III (thromboplastin, tissue factor)	FALSE	Homo sapiens coagulation factor III (thromboplastin, tissue factor) (F3), transcript variant 1, mRNA [NM_001993]	2152	GO:0005515|GO:0051897|GO:0030335|GO:0004896|GO:0005886|GO:0009986|GO:0006919|GO:0019221|GO:0002543|GO:0002020|GO:0005615|GO:0045766|GO:0031233|GO:0050927|GO:0031012|GO:0005543|GO:0001938|GO:0007596|GO:0002541|GO:0007598|GO:0010641|GO:0016021|GO:0070062	94995139	chr1	94995080	-	hs|1p21.3	NM_001993	chr1:94995139-94995080	NM_001993	Hs.62192
A_23_P104073	-2.55484	-1.35323	2.55484	down	-0.900078	-0.61737	0.594508	0.594508	S100A3	S100 calcium binding protein A3	FALSE	Homo sapiens S100 calcium binding protein A3 (S100A3), mRNA [NM_002960]	6274	GO:0005737|GO:0005509|GO:0005730|GO:0008270	153520057	chr1	153519998	-	hs|1q21.3	NM_002960	chr1:153520057-153519998	NM_002960	Hs.557609
A_23_P1102	-3.96957	-1.98898	3.96957	down	-0.464343	-0.569489	1.47207	1.47207	ACTA1	actin, alpha 1, skeletal muscle	FALSE	Homo sapiens actin, alpha 1, skeletal muscle (ACTA1), mRNA [NM_001100]	58	GO:0030240|GO:0005515|GO:0001725|GO:0030049|GO:0005884|GO:0009991|GO:0048741|GO:0072562|GO:0048545|GO:0015629|GO:0030017|GO:0005524|GO:0005615|GO:0005829|GO:0009612|GO:0006936|GO:0010226|GO:0043531|GO:0043503|GO:0005200|GO:0005865|GO:0016049|GO:0017022|GO:0070062	229567168	chr1	229567109	-	hs|1q42.13	NM_001100	chr1:229567168-229567109	NM_001100	Hs.1288
A_33_P3306146	-2.01	-1.0072	2.01	down	-0.29724	-0.118409	0.799371	0.799371	PLAU	plasminogen activator, urokinase	FALSE	Homo sapiens plasminogen activator, urokinase (PLAU), transcript variant 2, mRNA [NM_001145031]	5328	GO:0005515|GO:0033628|GO:0001666|GO:0010469|GO:0004252|GO:0005886|GO:0009986|GO:0014910|GO:0014909|GO:0005576|GO:2000097|GO:0005615|GO:0061041|GO:0007165|GO:0006935|GO:0007596|GO:0042127|GO:0006508|GO:0042730|GO:0005925|GO:0070062	75674673	chr10	75674614	+	hs|10q22.2	NM_001145031	chr10:75674614-75674673	NM_001145031	Hs.77274
A_21_P0014899	-2.15918	-1.11048	2.15918	down	-0.295249	-0.571033	0.677343	0.677343			FALSE	Homo sapiens cDNA FLJ44855 fis, clone BRACE3052486. [AK126805]			93459991	chr11	93459932	-	hs|11q21	AK126805	chr11:93459991-93459932		Hs.651430
A_21_P0013994	-2.0245	-1.01756	2.0245	down	-1.01651	-0.986661	0.0159798	0.0159798			FALSE
A_23_P429449	-2.72156	-1.44444	2.72156	down	-1.48201	-1.29913	0.0538642	0.0538642	NKD1	naked cuticle homolog 1 (Drosophila)	FALSE	Homo sapiens naked cuticle homolog 1 (Drosophila) (NKD1), mRNA [NM_033119]	85407	GO:0001754|GO:0005515|GO:0045732|GO:0005886|GO:0005509|GO:2000096|GO:0000159|GO:0090249|GO:0030165|GO:0007525|GO:0005737|GO:0016055|GO:0090090	50667944	chr16	50667885	+	hs|16q12.1	NM_033119	chr16:50667885-50667944	NM_033119	Hs.187578
A_33_P3359168	-2.4648	-1.30147	2.4648	down	0.576016	0.171948	1.67545	1.67545	LOC101927151	uncharacterized LOC101927151	FALSE	Homo sapiens uncharacterized LOC101927151 (LOC101927151), transcript variant 1, long non-coding RNA [NR_110687]	101927151		28297118	chr19	28297059	+	hs|19q11	NR_110687	chr19:28297059-28297118	NR_110687	Hs.733949
A_21_P0011734	-2.14043	-1.0979	2.14043	down	-2.03927	-2.20893	-1.0262	-1.0262	LOC100505851	uncharacterized LOC100505851	FALSE	PREDICTED: Homo sapiens uncharacterized LOC100505851 (LOC100505851), misc_RNA [XR_109588]	100505851		24135032	chr19	24134973	-	hs|19p12	XR_109588	chr19:24135032-24134973	XR_109588	Hs.190888
A_21_P0014458	-4.6041	-2.20292	4.6041	down	-0.841435	-0.652484	1.45596	1.45596			FALSE	Homo sapiens cDNA FLJ39168 fis, clone OCBBF2002920. [AK096487]			101628536	chr2	101628477	+	hs|2q11.2	AK096487	chr2:101628477-101628536		Hs.673671
A_33_P3360072	-2.64883	-1.40536	2.64883	down	-1.71319	-2.17045	-0.53646	-0.53646	RANBP3L	RAN binding protein 3-like	FALSE	Homo sapiens RAN binding protein 3-like (RANBP3L), transcript variant 1, mRNA [NM_001161429]	202151	GO:0046907	36249181	chr5	36249122	-	hs|5p13.2	NM_001161429	chr5:36249181-36249122	NM_001161429	Hs.729817
A_33_P3261173	-2.58446	-1.36986	2.58446	down	-0.0887513	0.0887513	1.36986	1.36986	FRAT1	frequently rearranged in advanced T-cell lymphomas 1	FALSE	Homo sapiens frequently rearranged in advanced T-cell lymphomas 1 (FRAT1), mRNA [NM_005479]	10023	GO:0000578|GO:0090263|GO:0016055|GO:0005829	99080647	chr10	99080588	+	hs|10q24.1	NM_005479	chr10:99080588-99080647	NM_005479	Hs.126057
A_33_P3316078	-2.00613	-1.00441	2.00613	down	-0.0992269	-0.399027	0.755287	0.755287	INTS6	integrator complex subunit 6	FALSE	Homo sapiens integrator complex subunit 6 (INTS6), transcript variant 3, mRNA [NM_001039938]	26512	GO:0005515|GO:0007165|GO:0032039|GO:0005654|GO:0015629|GO:0016180|GO:0004888	52023692	chr13	52023633	-	hs|13q14.3	NM_001039938	chr13:52023692-52023633	NM_001039938	Hs.439440
A_24_P353619	-2.25151	-1.17089	2.25151	down	0.375355	0.669856	1.6935	1.6935	ALPL	alkaline phosphatase, liver/bone/kidney	FALSE	Homo sapiens alkaline phosphatase, liver/bone/kidney (ALPL), transcript variant 1, mRNA [NM_000478]	249	GO:0005515|GO:0071529|GO:0005886|GO:0051384|GO:0033280|GO:0031225|GO:0005615|GO:0046872|GO:0001649|GO:0031012|GO:0003006|GO:0071407|GO:0001501|GO:0001958|GO:0016462|GO:0004035|GO:0016020|GO:0016311|GO:0032496|GO:0016021|GO:0046677|GO:0070062	21903884	chr1	21903084	+	hs|1p36.12	NM_000478	chr1:21903084-21903884	NM_000478	Hs.75431
A_23_P66481	-2.42509	-1.27804	2.42509	down	-0.0286453	0.292633	1.41003	1.41003	RTN4RL1	reticulon 4 receptor-like 1	FALSE	Homo sapiens reticulon 4 receptor-like 1 (RTN4RL1), mRNA [NM_178568]	146760	GO:0031103|GO:0009986|GO:0045121|GO:0004872|GO:0046658|GO:0009897|GO:0070062	1838527	chr17	1838468	-	hs|17p13.3	NM_178568	chr17:1838527-1838468	NM_178568	Hs.22917
A_23_P211039	-2.03102	-1.0222	2.03102	down	-1.20737	-1.06812	-0.115544	-0.115544	ADAMTS1	ADAM metallopeptidase with thrombospondin type 1 motif, 1	FALSE	Homo sapiens ADAM metallopeptidase with thrombospondin type 1 motif, 1 (ADAMTS1), mRNA [NM_006988]	9510	GO:0008285|GO:0001822|GO:0001542|GO:0031410|GO:0005604|GO:0060347|GO:0005737|GO:0007229|GO:0006508|GO:0008270|GO:0004222|GO:0008201|GO:0008237	28209768	chr21	28209709	-	hs|21q21.3	NM_006988	chr21:28209768-28209709	NM_006988	Hs.643357
A_33_P3353737	-4.79125	-2.2604	4.79125	down	-2.37439	-3.05213	-0.452859	-0.452859	ADH1B	alcohol dehydrogenase 1B (class I), beta polypeptide	FALSE	alcohol dehydrogenase 1B (class I), beta polypeptide [Source:HGNC Symbol;Acc:HGNC:250] [ENST00000305046]	125	GO:0006805|GO:0006069|GO:0004024|GO:0008270|GO:0044281|GO:0005829	100227587	chr4	100227528	-	hs|4q23	AF153821	chr4:100227587-100227528		Hs.4
A_23_P315364	-6.9092	-2.78852	6.9092	down	-0.188675	-0.249857	2.56925	2.56925	CXCL2	chemokine (C-X-C motif) ligand 2	FALSE	Homo sapiens chemokine (C-X-C motif) ligand 2 (CXCL2), mRNA [NM_002089]	2920	GO:0005515|GO:0008009|GO:0070098|GO:0002237|GO:0005576|GO:0045236|GO:0005615|GO:0002690|GO:0006955|GO:0006954|GO:0006935|GO:0007186|GO:0060326|GO:0042127|GO:0032496	74963044	chr4	74962985	-	hs|4q13.3	NM_002089	chr4:74963044-74962985	NM_002089	Hs.75765
A_33_P3711933	-2.04147	-1.0296	2.04147	down	-1.16886	-0.81272	0.0388157	0.0388157	ARHGAP42	Rho GTPase activating protein 42	FALSE	Homo sapiens Rho GTPase activating protein 42 (ARHGAP42), mRNA [NM_152432]	143872	GO:0043547|GO:0005622|GO:0007165|GO:0005096	100847156	chr11	100847097	+	hs|11q22.1	NM_152432	chr11:100847097-100847156	NM_152432	Hs.741465
A_23_P34345	-2.33842	-1.22553	2.33842	down	-1.29547	-1.15559	0	0	VCAM1	vascular cell adhesion molecule 1	FALSE	Homo sapiens vascular cell adhesion molecule 1 (VCAM1), transcript variant 1, mRNA [NM_001078]	7412	GO:0060710|GO:0019221|GO:0010043|GO:0005615|GO:0050901|GO:0007507|GO:0030198|GO:0071356|GO:0032496|GO:0050839|GO:0060333|GO:0070062|GO:0002526|GO:0005794|GO:0009986|GO:0007568|GO:0008131|GO:0005178|GO:0050776|GO:0009897|GO:0055114|GO:0035924|GO:0005886|GO:0005783|GO:0045471|GO:0002102|GO:0030175|GO:0010212|GO:0030183|GO:0042102|GO:0007159|GO:0016032|GO:0022614|GO:0007155|GO:0071333|GO:0007157|GO:…	101203842	chr1	101203783	+	hs|1p21.2	NM_001078	chr1:101203783-101203842	NM_001078	Hs.109225
A_23_P338534	-3.94609	-1.98042	3.94609	down	-0.507158	-0.273158	1.59027	1.59027	HIF3A	hypoxia inducible factor 3, alpha subunit	FALSE	Homo sapiens hypoxia inducible factor 3, alpha subunit (HIF3A), transcript variant 2, mRNA [NM_022462]	64344	GO:0003700|GO:0006357|GO:0006366|GO:0003714|GO:0003713|GO:0061418|GO:0071456|GO:0003677|GO:0005829|GO:0007165|GO:0046983|GO:0005654|GO:0004871	46828880	chr19	46828821	+	hs|19q13.32	NM_022462	chr19:46828821-46828880	NM_022462	Hs.420830
A_33_P3271930	-2.20924	-1.14355	2.20924	down	0.29223	0.14773	1.36353	1.36353	PYCR1	pyrroline-5-carboxylate reductase 1	FALSE	Homo sapiens pyrroline-5-carboxylate reductase 1 (PYCR1), transcript variant 2, mRNA [NM_153824]	5831	GO:0005515|GO:0055129|GO:0051881|GO:0008652|GO:0044281|GO:0042802|GO:0005739|GO:0034641|GO:0005759|GO:0006561|GO:0034599|GO:0004735|GO:0055114	79893301	chr17	79893242	-	hs|17q25.3	NM_153824	chr17:79893301-79893242	NM_153824	Hs.163451
A_23_P164258	-3.78211	-1.91919	3.78211	down	-1.70309	-2.16726	-0.0159814	-0.0159814	PIPOX	pipecolic acid oxidase	FALSE	Homo sapiens pipecolic acid oxidase (PIPOX), mRNA [NM_016518]	51268	GO:0008115|GO:0050031|GO:0033514|GO:0046653|GO:0005102|GO:0055114|GO:0005777	27383494	chr17	27383435	+	hs|17q11.2	NM_016518	chr17:27383435-27383494	NM_016518	Hs.462585
A_33_P3351101	-2.37548	-1.24822	2.37548	down	-0.378282	-0.317015	0.900572	0.900572	TYSND1	trypsin domain containing 1	FALSE	Homo sapiens trypsin domain containing 1 (TYSND1), transcript variant 1, mRNA [NM_173555]	219743	GO:0031998|GO:0016020|GO:0004252|GO:0016485|GO:0006508|GO:0051260|GO:0002020|GO:0042802|GO:0005777	71898108	chr10	71898049	-	hs|10q22.1	NM_173555	chr10:71898108-71898049	NM_173555	Hs.533655
A_32_P205637	-2.37009	-1.24494	2.37009	down	-1.11971	-0.937787	0.216192	0.216192	PARD6B	par-6 family cell polarity regulator beta	FALSE	Homo sapiens par-6 family cell polarity regulator beta (PARD6B), mRNA [NM_032521]	84612	GO:0005515|GO:0030334|GO:0005886|GO:0034329|GO:0045177|GO:0005634|GO:0007409|GO:0045216|GO:0005829|GO:0043234|GO:0005737|GO:0007049|GO:0006461|GO:0007163|GO:0070830|GO:0007043|GO:0005923|GO:0005938|GO:0070062|GO:0051301	49369836	chr20	49369777	+	hs|20q13.13	NM_032521	chr20:49369777-49369836	NM_032521	Hs.589848
A_33_P3279515	-4.22785	-2.07992	4.22785	down	-0.226232	-0.192704	1.87046	1.87046	LOC729451	uncharacterized LOC729451	FALSE	PREDICTED: Homo sapiens uncharacterized LOC729451 (LOC729451), misc_RNA [XR_424503]	729451		55152515	chr14	55152456	-	hs|14q22.2	XR_424503	chr14:55152515-55152456	XR_424503	Hs.647554
A_33_P3350547	-3.63903	-1.86356	3.63903	down	-0.541162	-0.920853	1.13255	1.13255	SCN5A	sodium channel, voltage gated, type V alpha subunit	FALSE	Homo sapiens sodium channel, voltage-gated, type V, alpha subunit (SCN5A), transcript variant 3, mRNA [NM_001099404]	6331	GO:0005515|GO:0005516|GO:0086010|GO:0086070|GO:0060307|GO:0060048|GO:0019228|GO:0060371|GO:0086067|GO:0086069|GO:0060373|GO:0060372|GO:0010765|GO:0007411|GO:0086002|GO:0001518|GO:0045760|GO:0086006|GO:0031625|GO:0086004|GO:0086005|GO:0050679|GO:0019901|GO:0003360|GO:0009986|GO:0017134|GO:0030506|GO:0021549|GO:0014894|GO:0044325|GO:0002027|GO:0086012|GO:0019899|GO:0003231|GO:0050998|GO:0051899|GO:…	38592239	chr3	38592180	-	hs|3p22.2	NM_001099404	chr3:38592239-38592180	NM_001099404	Hs.517898
A_21_P0008844	-12.1035	-3.59735	12.1035	down	-3.61045	-3.58425	0	0	lnc-FSIP1-6	lnc-FSIP1-6:1	FALSE	LNCipedia lincRNA (lnc-FSIP1-6), lincRNA [lnc-FSIP1-6:1]			39602989	chr15	39602930	-	hs|15q14		chr15:39602989-39602930
A_33_P3369731	-2.40807	-1.26788	2.40807	down	-1.52309	-1.48664	-0.236985	-0.236985			FALSE				176036472	chr5	176036413	+	hs|5q35.2		chr5:176036413-176036472
A_23_P79360	-2.11094	-1.07789	2.11094	down	-1.0948	-0.805415	0.127778	0.127778	NOSTRIN	nitric oxide synthase trafficking	FALSE	Homo sapiens nitric oxide synthase trafficking (NOSTRIN), transcript variant 1, mRNA [NM_052946]	115677	GO:0030666|GO:0005515|GO:0007165|GO:0005886|GO:0050999|GO:0046209|GO:0005634|GO:0044281|GO:0005856|GO:0045892|GO:0003677|GO:0006897	169721440	chr2	169721381	+	hs|2q31.1	NM_052946	chr2:169721381-169721440	NM_052946	Hs.189780
A_33_P3239134	-2.98986	-1.58008	2.98986	down	-0.067297	0.067297	1.58008	1.58008	POM121L4P	POM121 transmembrane nucleoporin-like 4 pseudogene	FALSE	Homo sapiens POM121 transmembrane nucleoporin-like 4 pseudogene (POM121L4P), non-coding RNA [NR_024592]	266697	GO:0008150|GO:0003674|GO:0005575	21045538	chr22	21045479	+	hs|22q11.21	NR_024592	chr22:21045479-21045538	NR_024592	Hs.558711
A_19_P00807374	-3.07709	-1.62157	3.07709	down	-1.36853	-0.933471	0.470567	0.470567	XLOC_l2_010558		FALSE	BROAD Institute lincRNA (XLOC_l2_010558), lincRNA [TCONS_l2_00020391]			6678175	chr4	6678116	+	hs|4p16.1		chr4:6678116-6678175
A_24_P74896	-2.03499	-1.02503	2.03499	down	-1.25966	-1.3203	-0.264959	-0.264959			FALSE	G protein-coupled receptor 144 [Source:HGNC Symbol;Acc:HGNC:18651] [ENST00000622546]			127228689	chr9	127228630	+	hs|9q33.3	XM_006710216	chr9:127228630-127228689	XM_006710216	Hs.454099
A_21_P0009941	-3.40919	-1.76943	3.40919	down	-1.77169	-1.76717	0	0			FALSE	DB066200 TESTI4 Homo sapiens cDNA clone TESTI4007460 5', mRNA sequence [DB066200]			17853695	chr20	17853636	+	hs|20p12.1		chr20:17853636-17853695		Hs.580786
A_21_P0009175	-5.68632	-2.5075	5.68632	down	-0.0593138	0.0593138	2.5075	2.5075			FALSE	DB100140 TESTI4 Homo sapiens cDNA clone TESTI4051979 5', mRNA sequence [DB100140]			49412991	chr17	49412932	+	hs|17q21.33		chr17:49412932-49412991		Hs.589503
A_21_P0009280	-3.45362	-1.78811	3.45362	down	-1.69722	-1.879	0	0	lnc-SEPT9-4	lnc-SEPT9-4:1	FALSE	LNCipedia lincRNA (lnc-SEPT9-4), lincRNA [lnc-SEPT9-4:1]			75663807	chr17	75663748	+	hs|17q25.3		chr17:75663748-75663807
A_23_P213562	-2.02951	-1.02113	2.02951	down	-1.14141	-0.828005	0.0364258	0.0364258	F2R	coagulation factor II (thrombin) receptor	FALSE	Homo sapiens coagulation factor II (thrombin) receptor (F2R), mRNA [NM_001992]	2149	GO:0005515|GO:0031594|GO:0051928|GO:0009653|GO:0043524|GO:0051482|GO:0045211|GO:0032496|GO:0070374|GO:0043123|GO:0031681|GO:0051209|GO:0005794|GO:0030335|GO:0004930|GO:0030168|GO:0014068|GO:0043280|GO:0007186|GO:0032967|GO:0005887|GO:0045893|GO:0051930|GO:0007260|GO:0008284|GO:0008285|GO:0005886|GO:0015057|GO:0007262|GO:0035025|GO:0007200|GO:0007204|GO:0007205|GO:0001965|GO:0000186|GO:0048873|GO:…	76030728	chr5	76030669	+	hs|5q13.3	NM_001992	chr5:76030669-76030728	NM_001992	Hs.482562
A_24_P335620	-2.55265	-1.352	2.55265	down	0.416779	0.749785	1.93528	1.93528	SLC7A5	solute carrier family 7 (amino acid transporter light chain, L system), member 5	FALSE	Homo sapiens solute carrier family 7 (amino acid transporter light chain, L system), member 5 (SLC7A5), mRNA [NM_003486]	8140	GO:0006520|GO:0005886|GO:0005730|GO:0006865|GO:0005634|GO:0050900|GO:0055085|GO:0030154|GO:0043231|GO:0005829|GO:0007399|GO:0015804|GO:0016324|GO:0005737|GO:0016020|GO:0015171|GO:0007596|GO:0042605|GO:0006810|GO:0015175|GO:0016021|GO:0015179|GO:0070062|GO:0006811	87863966	chr16	87863907	-	hs|16q24.2	NM_003486	chr16:87863966-87863907	NM_003486	Hs.513797
A_23_P376488	-22.7984	-4.51086	22.7984	down	0.153666	-0.602533	4.28642	4.28642	TNF	tumor necrosis factor	FALSE	Homo sapiens tumor necrosis factor (TNF), mRNA [NM_000594]	7124	GO:0032755|GO:0005515|GO:0009651|GO:0019722|GO:0032715|GO:0001819|GO:0002020|GO:0005615|GO:0042802|GO:0031622|GO:0043068|GO:0030730|GO:0000165|GO:0030198|GO:0034116|GO:0031663|GO:0000060|GO:0032729|GO:0005164|GO:0002876|GO:0009986|GO:0001891|GO:0032722|GO:0000122|GO:0005125|GO:0033209|GO:0005887|GO:0009897|GO:0008625|GO:0042346|GO:0002439|GO:0008285|GO:0005886|GO:0006927|GO:0002740|GO:0010693|GO:…	31545896	chr6	31545837	+	hs|6p21.33	NM_000594	chr6:31545837-31545896	NM_000594	Hs.241570
A_23_P209320	-2.83518	-1.50344	2.83518	down	-0.494413	-0.664623	0.923921	0.923921	PER2	period circadian clock 2	FALSE	Homo sapiens period circadian clock 2 (PER2), mRNA [NM_022817]	8864	GO:0005515|GO:0043130|GO:0048471|GO:0042826|GO:0006094|GO:0019249|GO:0035257|GO:0070345|GO:0005634|GO:2000678|GO:0000989|GO:0019229|GO:0001222|GO:0005737|GO:0050767|GO:0051726|GO:0006631|GO:0004871|GO:0031397|GO:0070063|GO:0051946|GO:0036002|GO:0019900|GO:0070932|GO:0000976|GO:0060567|GO:0005978|GO:0003713|GO:0005730|GO:0001047|GO:0000122|GO:0006351|GO:0032922|GO:0007165|GO:0050872|GO:0050796|GO:…	239152876	chr2	239152817	-	hs|2q37.3	NM_022817	chr2:239152876-239152817	NM_022817	Hs.58756
A_23_P81441	-2.25363	-1.17225	2.25363	down	-1.0612	-0.916686	0.183309	0.183309	DCANP1	dendritic cell-associated nuclear protein	FALSE	Homo sapiens dendritic cell-associated nuclear protein (DCANP1), mRNA [NM_130848]	140947	GO:0006355|GO:0005737|GO:0005634|GO:0003677|GO:0006351	134780033	chr5	134779974	-	hs|5q31.1	NM_130848	chr5:134780033-134779974	NM_130848	Hs.152477
A_23_P13382	-2.8616	-1.51682	2.8616	down	-0.73802	-1.01248	0.641572	0.641572	LSP1	lymphocyte-specific protein 1	FALSE	Homo sapiens lymphocyte-specific protein 1 (LSP1), transcript variant 3, mRNA [NM_001013254]	4046	GO:0007165|GO:0006968|GO:0016020|GO:0006935|GO:0005886|GO:0006928|GO:0003779|GO:0004871|GO:0015629|GO:0070062	1913423	chr11	1913364	+	hs|11p15.5	NM_001013254	chr11:1913364-1913423	NM_001013254	Hs.56729
A_33_P3305472	-2.03994	-1.02852	2.03994	down	-0.229483	-0.462791	0.682387	0.682387			FALSE	Homo sapiens cDNA FLJ41999 fis, clone SPLEN2029683. [AK123993]			74556437	chr17	74556378	+	hs|17q25.1	AK123993	chr17:74556378-74556437		Hs.288215
A_23_P158318	-2.91694	-1.54445	2.91694	down	-0.258683	0.107047	1.46864	1.46864	ROR2	receptor tyrosine kinase-like orphan receptor 2	FALSE	Homo sapiens receptor tyrosine kinase-like orphan receptor 2 (ROR2), mRNA [NM_004560]	4920	GO:0005515|GO:0017147|GO:0008285|GO:0005886|GO:0001756|GO:0090263|GO:0007223|GO:0030154|GO:0005109|GO:0030538|GO:0090090|GO:0060071|GO:0030335|GO:0042472|GO:0007254|GO:0007275|GO:0018108|GO:0005524|GO:0007165|GO:0005887|GO:0001502|GO:0004714|GO:0045893|GO:0007169|GO:0030669	94485526	chr9	94485467	-	hs|9q22.31	NM_004560	chr9:94485526-94485467	NM_004560	Hs.98255
A_23_P421379	-2.88625	-1.5292	2.88625	down	0.105518	0.345417	1.75466	1.75466	IGF2	insulin-like growth factor 2	FALSE	Homo sapiens insulin-like growth factor 2 (IGF2), transcript variant 1, mRNA [NM_000612]	3481	GO:0005515|GO:0005159|GO:0005158|GO:0050731|GO:0005615|GO:0009887|GO:0031667|GO:0007613|GO:0032355|GO:0070062|GO:2000467|GO:0007565|GO:0030168|GO:0007275|GO:0045840|GO:0038028|GO:0043085|GO:0001649|GO:0001501|GO:0005179|GO:0030546|GO:0043539|GO:0008083|GO:0044267|GO:0051146|GO:0008286|GO:0051897|GO:0008284|GO:0005886|GO:0071902|GO:0045471|GO:2000273|GO:0042104|GO:0045944|GO:0006006|GO:0031093|GO:…	2154754	chr11	2154402	-	hs|11p15.5	NM_000612	chr11:2154754-2154402	NM_000612	Hs.272259
A_23_P204304	-2.86659	-1.51934	2.86659	down	-1.78189	-1.89087	-0.317045	-0.317045	PTPRO	protein tyrosine phosphatase, receptor type, O	FALSE	Homo sapiens protein tyrosine phosphatase, receptor type, O (PTPRO), transcript variant 1, mRNA [NM_030667]	5800	GO:0005515|GO:0072112|GO:0043005|GO:0017147|GO:0030424|GO:0090260|GO:0036060|GO:0005886|GO:0030032|GO:0010812|GO:0042803|GO:0032835|GO:0035335|GO:0030426|GO:0016791|GO:0016324|GO:0006470|GO:0043197|GO:0007411|GO:0005001|GO:0090090|GO:0004725|GO:0070062|GO:0003105|GO:0016328|GO:0030027|GO:0002548|GO:0000902|GO:0005887|GO:0003093|GO:0010977|GO:0016021	15749747	chr12	15749688	+	hs|12p12.3	NM_030667	chr12:15749688-15749747	NM_030667	Hs.160871
A_33_P3260680	-7.52976	-2.9126	7.52976	down	-0.542268	-1.28533	1.9988	1.9988	OR2T4	olfactory receptor, family 2, subfamily T, member 4	FALSE	Homo sapiens olfactory receptor, family 2, subfamily T, member 4 (OR2T4), mRNA [NM_001004696]	127074	GO:0050911|GO:0004984|GO:0007186|GO:0005886|GO:0004930|GO:0016021	248525929	chr1	248525870	+	hs|1q44	NM_001004696	chr1:248525870-248525929	NM_001004696	Hs.553586
A_33_P3464749	-3.63925	-1.86364	3.63925	down	-1.63661	-2.09067	0	0	LINGO1-AS1	LINGO1 antisense RNA 1	FALSE	Homo sapiens LINGO1 antisense RNA 1 (LINGO1-AS1), long non-coding RNA [NR_045123]	253044		77941580	chr15	77941521	+	hs|15q24.3	NR_045123	chr15:77941521-77941580	NR_045123	Hs.667685
A_23_P67198	-2.84794	-1.50992	2.84794	down	-1.55798	-1.77209	-0.155119	-0.155119	CPAMD8	C3 and PZP-like, alpha-2-macroglobulin domain containing 8	FALSE	Homo sapiens C3 and PZP-like, alpha-2-macroglobulin domain containing 8 (CPAMD8), mRNA [NM_015692]	27151	GO:0010951|GO:0005886|GO:0004867|GO:0005615	17003871	chr19	17003812	-	hs|19p13.11	NM_015692	chr19:17003871-17003812	NM_015692	Hs.631644
A_33_P3399788	-2.44165	-1.28786	2.44165	down	-0.314326	-0.228641	1.01638	1.01638	SERPINA3	serpin peptidase inhibitor, clade A (alpha-1 antiproteinase, antitrypsin), member 3	FALSE	Homo sapiens serpin peptidase inhibitor, clade A (alpha-1 antiproteinase, antitrypsin), member 3 (SERPINA3), mRNA [NM_001085]	12	GO:0005515|GO:0004867|GO:0072562|GO:0005576|GO:0005634|GO:0006953|GO:0003677|GO:0005615|GO:0019216|GO:0005622|GO:0010951|GO:0006954|GO:0030277|GO:0070062	95090389	chr14	95090330	+	hs|14q32.13	NM_001085	chr14:95090330-95090389	NM_001085	Hs.534293
A_24_P157926	-2.84601	-1.50894	2.84601	down	-0.187694	-0.362143	1.23402	1.23402	TNFAIP3	tumor necrosis factor, alpha-induced protein 3	FALSE	Homo sapiens tumor necrosis factor, alpha-induced protein 3 (TNFAIP3), transcript variant 3, mRNA [NM_006290]	7128	GO:0005515|GO:0043130|GO:0016579|GO:0004842|GO:0070301|GO:0004843|GO:0032715|GO:0016874|GO:0032691|GO:0002020|GO:0043621|GO:0005764|GO:0051259|GO:0061043|GO:0070536|GO:0006508|GO:0031397|GO:0070062|GO:0043124|GO:0045824|GO:0071108|GO:0005813|GO:0070433|GO:0072573|GO:0032720|GO:0045087|GO:0008270|GO:0034144|GO:0045732|GO:0034140|GO:0045736|GO:0070423|GO:0002237|GO:0005634|GO:0072666|GO:0035872|GO:…	138203738	chr6	138203679	+	hs|6q23.3	NM_006290	chr6:138203679-138203738	NM_006290	Hs.211600
A_21_P0002771	-4.39618	-2.13625	4.39618	down	-0.330217	-0.320518	1.81088	1.81088	LOC100507389	uncharacterized LOC100507389	FALSE	Homo sapiens uncharacterized LOC100507389 (LOC100507389), long non-coding RNA [NR_038455]	100507389		142660607	chr3	142660548	+	hs|3q23	NR_038455	chr3:142660548-142660607	NR_038455	Hs.38715
A_23_P6381	-2.10759	-1.07559	2.10759	down	-0.372473	-0.494462	0.642125	0.642125	MN1	meningioma (disrupted in balanced translocation) 1	FALSE	Homo sapiens meningioma (disrupted in balanced translocation) 1 (MN1), mRNA [NM_002430]	4330	GO:0008150|GO:0003674|GO:0001957|GO:0005575	28145250	chr22	28145191	-	hs|22q12.1	NM_002430	chr22:28145250-28145191	NM_002430	Hs.268515
A_21_P0009927	-6.6531	-2.73403	6.6531	down	-0.220607	-0.211314	2.51807	2.51807	lnc-STK35-2	lnc-STK35-2:1	FALSE	LNCipedia lincRNA (lnc-STK35-2), lincRNA [lnc-STK35-2:1]			2187249	chr20	2187190	+	hs|20p13		chr20:2187190-2187249
A_32_P370026	-4.5578	-2.18834	4.5578	down	-0.220905	-0.211339	1.97222	1.97222			FALSE	BC030699 SHC SH2-domain binding protein 1 {Homo sapiens} (exp=-1; wgp=0; cg=0), partial (14%) [THC2657541]			29213509	chr19	29212996	-	hs|19q12		chr19:29213509-29212996
A_24_P183150	-8.64581	-3.112	8.64581	down	0.0389559	-0.161371	3.05079	3.05079	CXCL3	chemokine (C-X-C motif) ligand 3	FALSE	Homo sapiens chemokine (C-X-C motif) ligand 3 (CXCL3), mRNA [NM_002090]	2921	GO:0008009|GO:0006955|GO:0070098|GO:0006954|GO:0007186|GO:0042127|GO:0030593|GO:0032496|GO:0005576|GO:0045236|GO:0005615|GO:0002690	74902761	chr4	74902702	-	hs|4q13.3	NM_002090	chr4:74902761-74902702	NM_002090	Hs.89690
A_23_P343261	-9.62351	-3.26656	9.62351	down	-0.919504	-0.851932	2.38085	2.38085	LINC00337	long intergenic non-protein coding RNA 337	FALSE	Homo sapiens long intergenic non-protein coding RNA 337 (LINC00337), long non-coding RNA [NR_103534]	148645		6299338	chr1	6299279	+	hs|1p36.31	NR_103534	chr1:6299279-6299338	NR_103534	Hs.185688
A_21_P0002207	-2.67412	-1.41906	2.67412	down	-1.49305	-1.41387	-0.034395	-0.034395	lnc-SIX3-3	lnc-SIX3-3:1	FALSE	LNCipedia lincRNA (lnc-SIX3-3), lincRNA [lnc-SIX3-3:1]			45402616	chr2	45402557	+	hs|2p21		chr2:45402557-45402616
A_24_P288890	-2.17487	-1.12093	2.17487	down	0.0113158	-0.0113158	1.12093	1.12093	FAM101A	family with sequence similarity 101, member A	FALSE	Homo sapiens family with sequence similarity 101, member A (FAM101A), mRNA [NM_181709]	144347	GO:0005737|GO:0005856	124799616	chr12	124799557	+	hs|12q24.31	NM_181709	chr12:124799557-124799616	NM_181709	Hs.432901
A_32_P87013	-5.62825	-2.49269	5.62825	down	-0.312403	-0.38121	2.14588	2.14588	CXCL8	chemokine (C-X-C motif) ligand 8	FALSE	Homo sapiens chemokine (C-X-C motif) ligand 8 (CXCL8), mRNA [NM_000584]	3576	GO:0005515|GO:0034976|GO:0005153|GO:0008285|GO:0019722|GO:0002237|GO:0006928|GO:0005615|GO:0030155|GO:0030968|GO:0045091|GO:0031623|GO:0035556|GO:0006955|GO:0006954|GO:0006935|GO:0071356|GO:0007050|GO:0008009|GO:0070098|GO:0045744|GO:0030593|GO:0005576|GO:0048566|GO:0001525|GO:0044344|GO:0050930|GO:0007165|GO:0071222|GO:0007186|GO:0071347|GO:0090023|GO:0042119|GO:0006987|GO:0044267	74609324	chr4	74609265	+	hs|4q13.3	NM_000584	chr4:74609265-74609324	NM_000584	Hs.624
A_23_P31873	-2.39594	-1.26059	2.39594	down	-0.721594	-0.798794	0.500401	0.500401	RAB11FIP1	RAB11 family interacting protein 1 (class I)	FALSE	Homo sapiens RAB11 family interacting protein 1 (class I) (RAB11FIP1), transcript variant 3, mRNA [NM_001002814]	80223	GO:0045055|GO:0017137|GO:0005737|GO:0030670|GO:0055037|GO:0015031|GO:0043231	37718295	chr8	37718236	-	hs|8p11.23	NM_001002814	chr8:37718295-37718236	NM_001002814	Hs.191179
A_32_P206899	-3.03778	-1.60302	3.03778	down	-1.71054	-1.79931	-0.151907	-0.151907	DNAH2	dynein, axonemal, heavy chain 2	FALSE	Homo sapiens dynein, axonemal, heavy chain 2 (DNAH2), transcript variant 1, mRNA [NM_020877]	146754	GO:0001539|GO:0008152|GO:0005874|GO:0005858|GO:0003777|GO:0016887|GO:0005524|GO:0007018	7736989	chr17	7736930	+	hs|17p13.1	NM_020877	chr17:7736930-7736989	NM_020877	Hs.367649
A_23_P124619	-3.05948	-1.61329	3.05948	down	-0.483909	-0.931129	0.90577	0.90577	S100A14	S100 calcium binding protein A14	FALSE	Homo sapiens S100 calcium binding protein A14 (S100A14), mRNA [NM_020672]	57402	GO:0048471|GO:0030054|GO:0034142|GO:0005886|GO:0005509|GO:0006915|GO:0042379|GO:0071624|GO:0055074|GO:0005737|GO:0015630|GO:0032496|GO:0005654|GO:0090026|GO:0042742|GO:0070062	153587065	chr1	153587006	-	hs|1q21.3	NM_020672	chr1:153587065-153587006	NM_020672	Hs.288998
A_33_P3346688	-2.54333	-1.34672	2.54333	down	-1.06365	-1.32425	0.152769	0.152769			FALSE	heat shock 70kDa protein 8 [Source:HGNC Symbol;Acc:HGNC:5241] [ENST00000527983]			122930046	chr11	122929987	-	hs|11q24.1	AK310467	chr11:122930046-122929987		Hs.180414
A_33_P3373165	-3.63193	-1.86074	3.63193	down	-1.05145	-0.839751	0.915135	0.915135	DUX4	double homeobox 4	FALSE	Homo sapiens double homeobox 4 (DUX4), mRNA [NM_001293798]	100288687	GO:0031965|GO:0000976|GO:0008285|GO:0045944|GO:0006915|GO:0005654|GO:0005634|GO:0070317|GO:0006351	106397	chrUn_gl000228	106338	+		NM_001293798	chrUn_gl000228:106338-106397	NM_001293798	Hs.742140
A_33_P3219850	-6.493	-2.69889	6.493	down	0.0399942	-0.27163	2.58307	2.58307			FALSE				75253878	chr17	75253819	-	hs|17q25.2		chr17:75253878-75253819
A_21_P0013855	-8.17239	-3.03076	8.17239	down	-0.123766	0.597232	3.26749	3.26749			FALSE	EST95954 Testis I Homo sapiens cDNA 5' end, mRNA sequence [AA382712]			142909231	chrX	142909172	+	hs|Xq27.3		chrX:142909172-142909231		Hs.584685
A_33_P3291614	-3.08752	-1.62645	3.08752	down	0.350623	0.721227	2.16238	2.16238	LOC100133039	uncharacterized LOC100133039	FALSE	Homo sapiens cDNA FLJ25312 fis, clone SYN01070. [AK058041]	100133039		11605180	chr3	11605121	-	hs|3p25.3	AK058041	chr3:11605180-11605121		Hs.667544
A_21_P0008832	-2.35393	-1.23507	2.35393	down	-1.23117	-1.46506	-0.113045	-0.113045	C15orf59-AS1	C15orf59 antisense RNA 1	FALSE	Homo sapiens C15orf59 antisense RNA 1 (C15orf59-AS1), transcript variant 1, long non-coding RNA [NR_120352]	101929221		74061150	chr15	74060795	+	hs|15q24.1	NR_120352	chr15:74060795-74061150	NR_120352
A_21_P0003495	-3.41071	-1.77007	3.41071	down	0.124034	0.175515	1.91985	1.91985			FALSE	BX101708 Soares_testis_NHT Homo sapiens cDNA clone IMAGp998D234105, mRNA sequence [BX101708]			118235815	chr4	118235756	-	hs|4q26		chr4:118235815-118235756		Hs.129401
A_21_P0009418	-4.15365	-2.05438	4.15365	down	-0.990525	-0.970194	1.07402	1.07402	lnc-SRSF2-1	lnc-SRSF2-1:1	FALSE	LNCipedia lincRNA (lnc-SRSF2-1), lincRNA [lnc-SRSF2-1:1]			74776026	chr17	74775865	-	hs|17q25.1		chr17:74776026-74775865
A_21_P0000098	-2.16759	-1.11609	2.16759	down	-0.87172	-0.682025	0.339217	0.339217	CARD8	caspase recruitment domain family, member 8	FALSE	Homo sapiens caspase recruitment domain family, member 8 (CARD8), transcript variant 6, mRNA [NM_001184904]	22900	GO:0072559|GO:0043280|GO:0005515|GO:0005737|GO:0050718|GO:0006919|GO:0032089|GO:0005654|GO:0005634|GO:0008656|GO:0042803|GO:0043124	48741599	chr19	48741540	-	hs|19q13.33	NM_001184904	chr19:48741599-48741540	NM_001184904	Hs.446146
A_21_P0011272	-6.92832	-2.79251	6.92832	down	-0.650168	-1.15226	1.89129	1.89129	XLOC_l2_004537		FALSE	BROAD Institute lincRNA (XLOC_l2_004537), lincRNA [TCONS_l2_00008270]			103739630	chr14	103734637	-	hs|14q32.32		chr14:103739630-103734637
A_33_P3332287	-3.79308	-1.92337	3.79308	down	-0.246539	-0.834066	1.38307	1.38307			FALSE	double homeobox 4 like 9 [Source:HGNC Symbol;Acc:HGNC:33855] [ENST00000449051]			190942715	chr4	190942656	-	hs|4q35.2	XR_133387	chr4:190942715-190942656	XR_133387	Hs.742140
A_33_P3313825	-2.12134	-1.08498	2.12134	down	-0.797588	-0.882518	0.244926	0.244926	TGFBR2	transforming growth factor, beta receptor II (70/80kDa)	FALSE	PREDICTED: Homo sapiens transforming growth factor, beta receptor II (70/80kDa) (TGFBR2), transcript variant X1, mRNA [XM_006713316]	7048	GO:0005515|GO:0010468|GO:0060044|GO:0043627|GO:0046332|GO:0048701|GO:0002663|GO:0007224|GO:0007507|GO:0004702|GO:0018105|GO:0042127|GO:0018107|GO:0007179|GO:0060434|GO:0023014|GO:0007566|GO:0007568|GO:0031435|GO:0001701|GO:0006898|GO:0043235|GO:0007182|GO:0002666|GO:0060440|GO:0007420|GO:0042060|GO:0060389|GO:0009897|GO:0008284|GO:0003430|GO:0007369|GO:0005886|GO:0031100|GO:0005539|GO:0046872|GO:…	30703116	chr3	30703057	+	hs|3p24.1	XM_006713316	chr3:30703057-30703116	XM_006713316	Hs.82028
A_33_P3241621	-2.12856	-1.08988	2.12856	down	0.0235999	0.387883	1.29562	1.29562	LOC100129171	uncharacterized LOC100129171	FALSE	Homo sapiens cDNA FLJ16203 fis, clone CTONG2015633. [AK131268]	100129171		224854629	chr2	224854570	-	hs|2q36.1	AK131268	chr2:224854629-224854570		Hs.673047
A_33_P3295056	-2.09723	-1.06849	2.09723	down	-0.744201	-1.07692	0.157927	0.157927	PTPRCAP	protein tyrosine phosphatase, receptor type, C-associated protein	FALSE	Homo sapiens protein tyrosine phosphatase, receptor type, C-associated protein (PTPRCAP), mRNA [NM_005608]	5790	GO:0005886|GO:0006952|GO:0016021	67203521	chr11	67203462	-	hs|11q13.2	NM_005608	chr11:67203521-67203462	NM_005608	Hs.155975
A_33_P3393088	-2.26613	-1.18023	2.26613	down	-1.32876	-1.0317	0	0	RAB6C-AS1	RAB6C antisense RNA 1	FALSE	RAB6C antisense RNA 1 [Source:HGNC Symbol;Acc:HGNC:49278] [ENST00000624615]	100131320		130736544	chr2	130736485	-	hs|2q21.1	BC044241	chr2:130736544-130736485		Hs.535586
A_33_P3280346	-8.43913	-3.07709	8.43913	down	-0.218453	-0.506647	2.71454	2.71454	LOC100130857	uncharacterized LOC100130857	FALSE	Homo sapiens cDNA FLJ39731 fis, clone SMINT2015745. [AK097050]	100130857		32268700	chr15	32268641	+	hs|15q13.3	AK097050	chr15:32268641-32268700		Hs.636752
A_21_P0009013	-4.95754	-2.30963	4.95754	down	-0.246462	-0.223176	2.07481	2.07481	lnc-PARN-5	lnc-PARN-5:3	FALSE	LNCipedia lincRNA (lnc-PARN-5), lincRNA [lnc-PARN-5:3]			14114140	chr16	14114081	-	hs|16p13.12		chr16:14114140-14114081
A_21_P0004919	-2.99536	-1.58273	2.99536	down	-0.180991	0.00680637	1.49564	1.49564	lnc-CDC40-2	lnc-CDC40-2:1	FALSE	LNCipedia lincRNA (lnc-CDC40-2), lincRNA [lnc-CDC40-2:1]			110871580	chr6	110871521	+	hs|6q21		chr6:110871521-110871580
A_21_P0011840	-2.02985	-1.02137	2.02985	down	-0.996667	-0.95189	0.0470963	0.0470963	LOC100507334	two pore channel 3 pseudogene	FALSE	Homo sapiens two pore channel 3 pseudogene (LOC100507334), non-coding RNA [NR_037626]	100507334		111020327	chr2	111020268	+	hs|2q13	NR_037626	chr2:111020268-111020327	NR_037626	Hs.721040
A_23_P258887	-4.65679	-2.21934	4.65679	down	-0.222001	-0.208645	2.00401	2.00401	ALDH1L1	aldehyde dehydrogenase 1 family, member L1	FALSE	Homo sapiens aldehyde dehydrogenase 1 family, member L1 (ALDH1L1), transcript variant 2, mRNA [NM_012190]	10840	GO:0005739|GO:0016155|GO:0009058|GO:0008168|GO:0004029|GO:0016742|GO:0003824|GO:0032259|GO:0006730|GO:0070062|GO:0055114|GO:0009258	125826021	chr3	125824747	-	hs|3q21.3	NM_012190	chr3:125826021-125824747	NM_012190	Hs.434435
A_33_P3370855	-4.66006	-2.22035	4.66006	down	-0.551989	-0.495924	1.69639	1.69639			FALSE	GB			107627212	chrX	107627153	+	hs|Xq22.3		chrX:107627153-107627212
A_24_P182929	-2.68226	-1.42345	2.68226	down	-0.23142	-0.51846	1.04851	1.04851	KCNAB1	potassium channel, voltage gated subfamily A regulatory beta subunit 1	FALSE	Homo sapiens potassium channel, voltage gated subfamily A regulatory beta subunit 1 (KCNAB1), transcript variant 2, mRNA [NM_003471]	7881	GO:0005886|GO:0007268|GO:0015459|GO:0034705|GO:0070402|GO:0005829|GO:0031234|GO:0004033|GO:0005249|GO:0007611|GO:0006813|GO:0071805|GO:0055114	156255906	chr3	156255847	+	hs|3q25.31	NM_003471	chr3:156255847-156255906	NM_003471	Hs.654519
A_24_P291658	-2.91856	-1.54526	2.91856	down	-1.79333	-1.88769	-0.295257	-0.295257	ADH1A	alcohol dehydrogenase 1A (class I), alpha polypeptide	FALSE	Homo sapiens alcohol dehydrogenase 1A (class I), alpha polypeptide (ADH1A), mRNA [NM_000667]	124	GO:0005515|GO:0004022|GO:0006805|GO:0017144|GO:0006066|GO:0006069|GO:0004024|GO:0008270|GO:0044281|GO:0005829	100200647	chr4	100200588	-	hs|4q23	NM_000667	chr4:100200647-100200588	NM_000667	Hs.654433
A_33_P3336557	-2.42077	-1.27547	2.42077	down	-1.26256	-1.41487	-0.0632446	-0.0632446			FALSE				197387558	chr3	197387499	-	hs|3q29		chr3:197387558-197387499
A_23_P390139	-6.47593	-2.69509	6.47593	down	-0.219012	-0.208351	2.48141	2.48141	TMEM74	transmembrane protein 74	FALSE	Homo sapiens transmembrane protein 74 (TMEM74), mRNA [NM_153015]	157753	GO:0000421|GO:0006914|GO:0031410|GO:0016021|GO:0005765	109796065	chr8	109796006	-	hs|8q23.1	NM_153015	chr8:109796065-109796006	NM_153015	Hs.99439
A_19_P00801324	-3.45182	-1.78736	3.45182	down	-1.54634	-1.0791	0.474635	0.474635	LINC01355	long intergenic non-protein coding RNA 1355	FALSE	Homo sapiens long intergenic non-protein coding RNA 1355 (LINC01355), long non-coding RNA [NR_110616]	100996511		23609259	chr1	23609200	-	hs|1p36.12	NR_110616	chr1:23609259-23609200	NR_110616	Hs.99836
A_33_P3333554	-3.60508	-1.85003	3.60508	down	-0.114545	-0.502854	1.54133	1.54133	ACTR3C	ARP3 actin-related protein 3 homolog C (yeast)	FALSE	ARP3 actin-related protein 3 homolog C (yeast) [Source:HGNC Symbol;Acc:HGNC:37282] [ENST00000613959]	653857	GO:0034314|GO:0008150|GO:0003674|GO:0005885|GO:0003779|GO:0005524|GO:0070062	149941768	chr7	149941709	-	hs|7q36.1	BX640643	chr7:149941768-149941709		Hs.664579
A_33_P3359647	-2.08195	-1.05794	2.08195	down	-1.45867	-1.16103	-0.251919	-0.251919	OPRL1	opiate receptor-like 1	FALSE	Homo sapiens opiate receptor-like 1 (OPRL1), transcript variant 1, mRNA [NM_182647]	4987	GO:0005515|GO:0043005|GO:0005886|GO:0004930|GO:0007268|GO:0038003|GO:0007193|GO:0007204|GO:0019233|GO:0042923|GO:0005887|GO:0007218|GO:0007610|GO:0016023|GO:0001626|GO:0007600	62729383	chr20	62729324	+	hs|20q13.33	NM_182647	chr20:62729324-62729383	NM_182647	Hs.2859
A_33_P3367748	-12.401	-3.63239	12.401	down	-0.251244	-0.22633	3.3936	3.3936	COL9A2	collagen, type IX, alpha 2	FALSE	collagen, type IX, alpha 2 [Source:HGNC Symbol;Acc:HGNC:2218] [ENST00000461118]	1298	GO:0001501|GO:0030020|GO:0022617|GO:0030198|GO:0007411|GO:0030574|GO:0005578|GO:0005788|GO:0005594|GO:0005576	40783410	chr1	40783351	-	hs|1p34.2	BC065715	chr1:40783410-40783351		Hs.418012
A_24_P280333	-2.44382	-1.28914	2.44382	down	-0.922927	-1.30597	0.174689	0.174689	KRT40	keratin 40, type I	FALSE	Homo sapiens keratin 40, type I (KRT40), mRNA [NM_182497]	125115	GO:0005882|GO:0005198	39134153	chr17	39134094	-	hs|17q21.2	NM_182497	chr17:39134153-39134094	NM_182497	Hs.534929
A_21_P0008453	-4.83799	-2.27441	4.83799	down	-0.52098	-0.0809665	1.97344	1.97344			FALSE				70920184	chr14	70920125	-	hs|14q24.2		chr14:70920184-70920125		Hs.578179
A_33_P3695899	-4.86052	-2.28111	4.86052	down	-1.31308	-0.822052	1.21354	1.21354	FLJ31104	uncharacterized LOC441072	FALSE	Homo sapiens uncharacterized LOC441072 (FLJ31104), long non-coding RNA [NR_102755]	441072		55299388	chr5	55299329	+	hs|5q11.2	NR_102755	chr5:55299329-55299388	NR_102755	Hs.482141
A_24_P400130	-14.0755	-3.81511	14.0755	down	-2.70701	-2.68562	1.11879	1.11879	KRTAP7-1	keratin associated protein 7-1 (gene/pseudogene)	FALSE	Homo sapiens keratin associated protein 7-1 (gene/pseudogene) (KRTAP7-1), mRNA [NM_181606]	337878	GO:0005882	32201777	chr21	32201718	-	hs|21q22.11	NM_181606	chr21:32201777-32201718	NM_181606	Hs.407656
A_33_P3363893	-7.52842	-2.91235	7.52842	down	-0.226878	-0.210159	2.69383	2.69383			FALSE				67746137	chr12	67746078	+	hs|12q15		chr12:067746078-067746137
A_33_P3415778	-5.48396	-2.45522	5.48396	down	-0.391499	-0.400279	2.05933	2.05933	LOC100129721	uncharacterized LOC100129721	FALSE	Homo sapiens cDNA FLJ44685 fis, clone BRACE3011447. [AK126643]	100129721		61468597	chr10	61468538	-	hs|10q21.2	AK126643	chr10:61468597-61468538		Hs.499709
A_23_P18078	-2.39843	-1.26209	2.39843	down	-1.33772	-1.13137	0.0275493	0.0275493	RARRES1	retinoic acid receptor responder (tazarotene induced) 1	FALSE	Homo sapiens retinoic acid receptor responder (tazarotene induced) 1 (RARRES1), transcript variant 1, mRNA [NM_206963]	5918	GO:0008285|GO:0016021|GO:0070062	158422689	chr3	158422630	-	hs|3q25.32	NM_206963	chr3:158422689-158422630	NM_206963	Hs.131269
A_33_P3762918	-2.68476	-1.4248	2.68476	down	-0.849995	-0.673887	0.662854	0.662854	LINC01004	long intergenic non-protein coding RNA 1004	FALSE	Homo sapiens long intergenic non-protein coding RNA 1004 (LINC01004), long non-coding RNA [NR_039981]	100216546		104622285	chr7	104622226	-	hs|7q22.3	NR_039981	chr7:104622285-104622226	NR_039981	Hs.369356
A_33_P3388357	-3.95186	-1.98253	3.95186	down	-1.34593	-1.34297	0.638088	0.638088	WDR87	WD repeat domain 87	FALSE	Homo sapiens WD repeat domain 87 (WDR87), transcript variant 1, mRNA [NM_001291088]	83889		38375641	chr19	38375582	-	hs|19q13.13	NM_001291088	chr19:38375641-38375582	NM_001291088	Hs.664194
A_23_P71037	-4.79187	-2.26059	4.79187	down	0.558491	0.443783	2.76173	2.76173	IL6	interleukin 6	FALSE	Homo sapiens interleukin 6 (IL6), mRNA [NM_000600]	3569	GO:0005515|GO:0032755|GO:0033160|GO:0009408|GO:0045599|GO:0008360|GO:0010996|GO:0009409|GO:0019221|GO:0005615|GO:0031175|GO:0045079|GO:0031667|GO:0032868|GO:0045740|GO:0007568|GO:0030168|GO:0042832|GO:0005896|GO:0006953|GO:0032722|GO:0005125|GO:0032966|GO:0016049|GO:0045454|GO:0045893|GO:0008083|GO:0009897|GO:0001781|GO:0005138|GO:0008284|GO:0008285|GO:0045188|GO:0045429|GO:0005737|GO:0033138|GO:…	22771266	chr7	22771207	+	hs|7p15.3	NM_000600	chr7:22771207-22771266	NM_000600	Hs.654458
A_33_P3243230	-7.24138	-2.85626	7.24138	down	-0.288589	-0.821984	2.30098	2.30098			FALSE	HSINTLK8M interleukin 8 {Homo sapiens} (exp=-1; wgp=0; cg=0), partial (97%) [THC2544321]			74608041	chr4	74607982	+	hs|4q13.3		chr4:074607982-074608041
A_21_P0007984	-3.46898	-1.79451	3.46898	down	-0.461563	0.187858	1.65766	1.65766			FALSE	long intergenic non-protein coding RNA 426 [Source:HGNC Symbol;Acc:HGNC:42761] [ENST00000416261]			30951028	chr13	30950969	-	hs|13q12.3		chr13:30951028-30950969		Hs.735388
A_23_P354705	-4.57962	-2.19523	4.57962	down	-2.07593	-1.39597	0.459279	0.459279	ST8SIA1	ST8 alpha-N-acetyl-neuraminide alpha-2,8-sialyltransferase 1	FALSE	Homo sapiens ST8 alpha-N-acetyl-neuraminide alpha-2,8-sialyltransferase 1 (ST8SIA1), mRNA [NM_003034]	6489	GO:0003828|GO:0008284|GO:0008373|GO:0005975|GO:0006688|GO:0034605|GO:0030173|GO:0000139|GO:0016021|GO:0006488|GO:0044267|GO:0018279|GO:0043687	22354130	chr12	22354071	-	hs|12p12.1	NM_003034	chr12:22354130-22354071	NM_003034	Hs.408614
A_21_P0013304	-7.71547	-2.94775	7.71547	down	-0.450612	-0.543681	2.45061	2.45061	XLOC_l2_013808		FALSE	BROAD Institute lincRNA (XLOC_l2_013808), lincRNA [TCONS_l2_00026553]			45779081	chr7	45779022	-	hs|7p12.3		chr7:45779081-45779022
A_33_P3381361	-2.01911	-1.01372	2.01911	down	-0.0984819	-0.0571022	0.935927	0.935927	SPG7	spastic paraplegia 7 (pure and complicated autosomal recessive)	FALSE	spastic paraplegia 7 (pure and complicated autosomal recessive) [Source:HGNC Symbol;Acc:HGNC:11237] [ENST00000562775]	6687	GO:0005515|GO:0031966|GO:0005524|GO:0007399|GO:0005739|GO:0006508|GO:0008233|GO:0008270|GO:0007005|GO:0008089|GO:0016021|GO:0051082|GO:0004222	89590434	chr16	89590375	+	hs|16q24.3	AF090912	chr16:89590375-89590434
A_23_P137935	-10.1156	-3.33851	10.1156	down	-1.03563	-0.358781	2.6413	2.6413	MNDA	myeloid cell nuclear differentiation antigen	FALSE	Homo sapiens myeloid cell nuclear differentiation antigen (MNDA), mRNA [NM_002432]	4332	GO:0050853|GO:0005515|GO:0006968|GO:0006355|GO:0005737|GO:0043065|GO:0030889|GO:0005634|GO:0003677|GO:0006974|GO:0006351|GO:0070062	158818999	chr1	158817667	+	hs|1q23.1	NM_002432	chr1:158817667-158818999	NM_002432	Hs.153837
A_33_P3421656	-2.95246	-1.56192	2.95246	down	-0.604877	-0.548869	0.985043	0.985043	TINAG	tubulointerstitial nephritis antigen	FALSE	Homo sapiens tubulointerstitial nephritis antigen (TINAG), mRNA [NM_014464]	27283	GO:0004197|GO:0006955|GO:0000166|GO:0006508|GO:0030247|GO:0007155|GO:0006898|GO:0005604|GO:0005044	54185439	chr6	54185380	+	hs|6p12.1	NM_014464	chr6:54185380-54185439	NM_014464	Hs.127011
A_21_P0002117	-3.05931	-1.61321	3.05931	down	-2.16087	-1.94794	-0.441197	-0.441197			FALSE				154028601	chr2	154028542	-	hs|2q23.3		chr2:154028601-154028542
A_24_P314477	-2.90518	-1.53863	2.90518	down	-1.65943	-1.41782	0	0	TUBB2B	tubulin, beta 2B class IIb	FALSE	Homo sapiens tubulin, beta 2B class IIb (TUBB2B), mRNA [NM_178012]	347733	GO:0005515|GO:0051258|GO:0005874|GO:0003924|GO:0005634|GO:0005525|GO:0055085|GO:0006184|GO:0005737|GO:0006457|GO:0005200|GO:0051084|GO:0001764|GO:0007017|GO:0044267	3224810	chr6	3224751	-	hs|6p25.2	NM_178012	chr6:3224810-3224751	NM_178012	Hs.300701
A_19_P00316241	-2.20226	-1.13898	2.20226	down	-1.87344	-1.84546	-0.720466	-0.720466	LOC101928858	uncharacterized LOC101928858	FALSE	PREDICTED: Homo sapiens uncharacterized LOC101928858 (RP11-434D9.1), transcript variant X3, ncRNA [XR_427726]	101928858		67100735	chr5	67100676	+	hs|5q13.1	XR_427726	chr5:67100676-67100735	XR_427726
A_33_P3344233	-8.48489	-3.0849	8.48489	down	-0.755009	-0.729272	2.34276	2.34276	PRAC2	prostate cancer susceptibility candidate 2	FALSE	Homo sapiens prostate cancer susceptibility candidate 2 (PRAC2), transcript variant 1, mRNA [NM_001282276]	360205	GO:0005634	46801123	chr17	46801064	+	hs|17q21.32	NM_001282276	chr17:46801064-46801123	NM_001282276
A_21_P0013890	-5.32998	-2.41413	5.32998	down	-0.231386	-0.211858	2.19251	2.19251			FALSE	raftlin, lipid raft linker 1 pseudogene 1 [Source:HGNC Symbol;Acc:HGNC:23971] [ENST00000442584]			7677257	chrY	7677198	-	hs|Yp11.2		chrY:7677257-7677198
A_33_P3780834	-5.79968	-2.53597	5.79968	down	-0.216247	-0.207981	2.32386	2.32386	LOC340090	uncharacterized LOC340090	FALSE	PREDICTED: Homo sapiens uncharacterized LOC340090 (LOC340090), misc_RNA [XR_241819]	340090		72491211	chr5	72491152	-	hs|5q13.2	XR_241819	chr5:72491211-72491152	XR_241819	Hs.434311
A_33_P3322307	-2.01258	-1.00905	2.01258	down	0.0771685	0.287632	1.19145	1.19145	DDX11	DEAD/H (Asp-Glu-Ala-Asp/His) box helicase 11	FALSE	Homo sapiens DEAD/H (Asp-Glu-Ala-Asp/His) box helicase 11 (DDX11), transcript variant 5, mRNA [NM_001257145]	1663	GO:0005515|GO:0000790|GO:0051539|GO:0003723|GO:0004386|GO:0005730|GO:0030496|GO:0005634|GO:0005524|GO:0046872|GO:0030968|GO:0000922|GO:0005737|GO:0003690|GO:0004003|GO:0003697|GO:0016032|GO:0007062|GO:0005654|GO:0032508|GO:0006987|GO:0044267|GO:0070062|GO:0008094	31255953	chr12	31255894	+	hs|12p11.21	NM_001257145	chr12:31255894-31255953	NM_001257145	Hs.443960
A_19_P00321132	-2.06036	-1.0429	2.06036	down	-1.09882	-0.986981	0	0	LOC101927136	uncharacterized LOC101927136	FALSE	Homo sapiens uncharacterized LOC101927136 (LOC101927136), long non-coding RNA [NR_110840]	101927136		53429028	chr6	53428969	-	hs|6p12.1	NR_110840	chr6:53429028-53428969	NR_110840	Hs.509788
A_21_P0012371	-2.66122	-1.41209	2.66122	down	-0.397821	-0.435039	0.995659	0.995659	XLOC_l2_009655		FALSE	BROAD Institute lincRNA (XLOC_l2_009655), lincRNA [TCONS_l2_00018485]			28800086	chr3	28800027	+	hs|3p24.1		chr3:28800027-28800086
A_23_P154605	-2.77497	-1.47247	2.77497	down	-0.867421	-0.937624	0.56995	0.56995	SULF2	sulfatase 2	FALSE	Homo sapiens sulfatase 2 (SULF2), transcript variant 1, mRNA [NM_018837]	55959	GO:0005795|GO:0005886|GO:0009986|GO:0051216|GO:0001822|GO:0005783|GO:0005509|GO:0048706|GO:0035860|GO:0030177|GO:0008449|GO:0032836|GO:0005615|GO:0010575|GO:0060384|GO:0060348|GO:0002063|GO:0003094|GO:0040037|GO:0004065|GO:0030201|GO:0014846	46286483	chr20	46286424	-	hs|20q13.12	NM_018837	chr20:46286483-46286424	NM_018837	Hs.162016
A_33_P3318766	-3.94174	-1.97883	3.94174	down	-0.721051	-0.508726	1.36395	1.36395			FALSE				2624326	chr1	2624269	-	hs|1p36.32		chr1:002624326-002624269
A_21_P0002524	-5.02405	-2.32885	5.02405	down	-0.192154	-0.205769	2.12989	2.12989			FALSE				177390038	chr2	177389979	-	hs|2q31.1		chr2:177390038-177389979		Hs.580085
A_23_P28598	-3.65414	-1.86953	3.65414	down	0.196117	-0.0080936	1.96354	1.96354	DLX2	distal-less homeobox 2	FALSE	Homo sapiens distal-less homeobox 2 (DLX2), mRNA [NM_004405]	1746	GO:0045746|GO:0003727|GO:0003700|GO:0051216|GO:0021544|GO:0005634|GO:0009954|GO:0000122|GO:0048701|GO:0043565|GO:0021766|GO:0021772|GO:0007420|GO:0045944|GO:0003682|GO:0048715|GO:0042475|GO:0048755|GO:0021893|GO:0021882	172964421	chr2	172964362	-	hs|2q31.1	NM_004405	chr2:172964421-172964362	NM_004405	Hs.419
A_21_P0014300	-2.25168	-1.171	2.25168	down	-1.14986	-1.19214	0	0	LOC104613533	uncharacterized LOC104613533	FALSE	Homo sapiens uncharacterized LOC104613533 (LOC104613533), long non-coding RNA [NR_126501]	104613533		93013522	chr15	93013463	-	hs|15q26.1	NR_126501	chr15:93013522-93013463	NR_126501	Hs.97584
A_33_P3249160	-6.10206	-2.6093	6.10206	down	-1.20187	-1.54691	1.23491	1.23491	FAM47C	family with sequence similarity 47, member C	FALSE	Homo sapiens family with sequence similarity 47, member C (FAM47C), mRNA [NM_001013736]	442444		37029726	chrX	37029667	+	hs|Xp21.1	NM_001013736	chrX:37029667-37029726	NM_001013736	Hs.535216
A_33_P3354945	-2.18431	-1.12718	2.18431	down	0.18203	0.198828	1.31761	1.31761	CSF1	colony stimulating factor 1 (macrophage)	FALSE	Homo sapiens colony stimulating factor 1 (macrophage) (CSF1), transcript variant 2, mRNA [NM_172210]	1435	GO:0048471|GO:0008284|GO:0005886|GO:0008283|GO:0005157|GO:0046579|GO:0005615|GO:0042803|GO:0030154|GO:0048873|GO:0006954|GO:0030278|GO:0045657|GO:0045860|GO:0042476|GO:0030225|GO:0040018|GO:0002158|GO:0070062|GO:0030097|GO:0030335|GO:0010744|GO:0010743|GO:0030316|GO:0045672|GO:0060763|GO:0045651|GO:0005125|GO:0043235|GO:0010628|GO:0003006|GO:0032270|GO:0032946|GO:0001503|GO:0016020|GO:0042117|GO:…	110466196	chr1	110466137	+	hs|1p13.3	NM_172210	chr1:110466137-110466196	NM_172210	Hs.173894
A_19_P00318740	-3.90903	-1.96681	3.90903	down	-2.66827	-2.77451	-0.754577	-0.754577	LOC101928858	uncharacterized LOC101928858	FALSE	PREDICTED: Homo sapiens uncharacterized LOC101928858 (RP11-434D9.1), transcript variant X3, ncRNA [XR_427726]	101928858		67100688	chr5	67100629	+	hs|5q13.1	XR_427726	chr5:67100629-67100688	XR_427726
A_21_P0010080	-4.31438	-2.10915	4.31438	down	-0.31783	0.0557985	1.97814	1.97814	lnc-C20orf187-1	lnc-C20orf187-1:2	FALSE	DB030984 TESTI2 Homo sapiens cDNA clone TESTI2014797 5', mRNA sequence [DB030984]			10976771	chr20	10972525	+	hs|20p12.2		chr20:10972525-10976771		Hs.570364
A_24_P203328	-2.52769	-1.33782	2.52769	down	-1.06469	-0.993904	0.308523	0.308523	TPRXL	tetra-peptide repeat homeobox-like	FALSE	Homo sapiens tetra-peptide repeat homeobox-like (TPRXL), non-coding RNA [NR_002223]	348825		14107369	chr3	14107310	+	hs|3p25.1	NR_002223	chr3:14107310-14107369	NR_002223	Hs.529180
A_24_P119545	-7.00424	-2.80823	7.00424	down	-0.244946	-0.221432	2.57504	2.57504	ITPKB	inositol-trisphosphate 3-kinase B	FALSE	inositol-trisphosphate 3-kinase B [Source:HGNC Symbol;Acc:HGNC:6179] [ENST00000366784]	3707	GO:0005515|GO:0046638|GO:0005516|GO:0008440|GO:0043647|GO:0046579|GO:0044281|GO:0005524|GO:0045059|GO:0005829|GO:0007165|GO:0000165|GO:0007166	226895408	chr1	226895349	-	hs|1q42.12	XM_005273120	chr1:226895408-226895349	XM_005273120	Hs.528087
A_23_P169293	-5.53028	-2.46735	5.53028	down	-1.03665	-1.02386	1.4371	1.4371	DMRT1	doublesex and mab-3 related transcription factor 1	FALSE	Homo sapiens doublesex and mab-3 related transcription factor 1 (DMRT1), mRNA [NM_021951]	1761	GO:0000987|GO:0003700|GO:0046661|GO:0005634|GO:0007283|GO:0048599|GO:0042803|GO:0046872|GO:0035556|GO:1900107|GO:0005737|GO:0060008|GO:0060009|GO:0030238|GO:0045944|GO:0008354|GO:0002176|GO:0046982|GO:0045840|GO:0000122|GO:0006351|GO:0000902|GO:0003682|GO:0060903|GO:0045835|GO:2000020	968332	chr9	968273	+	hs|9p24.3	NM_021951	chr9:968273-968332	NM_021951	Hs.98586
A_33_P3313846	-3.17316	-1.66592	3.17316	down	-1.12102	-0.535627	0.837596	0.837596	ZDHHC8	zinc finger, DHHC-type containing 8	FALSE	Homo sapiens zinc finger, DHHC-type containing 8 (ZDHHC8), transcript variant 2, mRNA [NM_013373]	29801	GO:0005739|GO:0018345|GO:0005794|GO:0016409|GO:0008270|GO:0007626|GO:0016021|GO:0030659|GO:0019706	20134247	chr22	20134188	+	hs|22q11.21	NM_013373	chr22:20134188-20134247	NM_013373	Hs.63128
A_21_P0011733	-2.06852	-1.0486	2.06852	down	-2.02859	-2.32801	-1.1297	-1.1297	LOC100505851	uncharacterized LOC100505851	FALSE	PREDICTED: Homo sapiens uncharacterized LOC100505851 (LOC100505851), misc_RNA [XR_109588]	100505851		24132615	chr19	24132556	-	hs|19p12	XR_109588	chr19:24132615-24132556	XR_109588	Hs.190888
A_21_P0014150	-5.07191	-2.34253	5.07191	down	-0.55533	-0.4203	1.85472	1.85472	LOC101928489	uncharacterized LOC101928489	FALSE	Homo sapiens uncharacterized LOC101928489 (LOC101928489), long non-coding RNA [NR_110889]	101928489		74404084	chr6	74404025	-	hs|6q13	NR_110889	chr6:74404084-74404025	NR_110889	Hs.660059
A_21_P0000624	-2.38763	-1.25558	2.38763	down	0.0333946	-0.0822234	1.23117	1.23117	SLC6A13	solute carrier family 6 (neurotransmitter transporter), member 13	FALSE	Homo sapiens solute carrier family 6 (neurotransmitter transporter), member 13 (SLC6A13), transcript variant 3, mRNA [NM_001243392]	6540	GO:0005886|GO:0005887|GO:0005328|GO:0015812|GO:0007268|GO:0055085|GO:0005332|GO:0007269|GO:0070062	368339	chr12	368280	-	hs|12p13.33	NM_001243392	chr12:368339-368280	NM_001243392	Hs.504398
A_23_P380379	-4.16712	-2.05905	4.16712	down	-0.616746	-1.08021	1.21057	1.21057	CAPS2	calcyphosine 2	FALSE	Homo sapiens calcyphosine 2 (CAPS2), transcript variant 3, mRNA [NM_001286548]	84698	GO:0005509	75671463	chr12	75671404	-	hs|12q21.1	NM_001286548	chr12:75671463-75671404	NM_001286548	Hs.733835
A_19_P00319709	-2.77757	-1.47383	2.77757	down	-0.216821	-0.0638666	1.33348	1.33348	LINC00883	long intergenic non-protein coding RNA 883	FALSE	Homo sapiens long intergenic non-protein coding RNA 883 (LINC00883), transcript variant 2, long non-coding RNA [NR_028302]	344595		107010694	chr3	107010635	+	hs|3q13.12	NR_028302	chr3:107010635-107010694	NR_028302	Hs.543039
A_23_P419714	-4.88898	-2.28953	4.88898	down	-0.528932	-0.505524	1.77231	1.77231	BTBD11	BTB (POZ) domain containing 11	FALSE	Homo sapiens BTB (POZ) domain containing 11 (BTBD11), transcript variant a, mRNA [NM_001018072]	121551	GO:0046982|GO:0016021|GO:0060395	108052938	chr12	108052879	+	hs|12q23.3	NM_001018072	chr12:108052879-108052938	NM_001018072	Hs.271272
A_24_P128524	-4.93541	-2.30317	4.93541	down	-1.37885	-1.48049	0.873502	0.873502	ICMT	isoprenylcysteine carboxyl methyltransferase	FALSE	Homo sapiens isoprenylcysteine carboxyl methyltransferase (ICMT), mRNA [NM_012405]	23463	GO:0008284|GO:0005783|GO:0046578|GO:0001701|GO:0001889|GO:0004671|GO:0008140|GO:0035264|GO:0016020|GO:0006481|GO:0006612|GO:0003880|GO:0005789|GO:0016021|GO:0006464	6281375	chr1	6281316	-	hs|1p36.31	NM_012405	chr1:6281375-6281316	NM_012405	Hs.515688
A_33_P3209756	-3.89705	-1.96238	3.89705	down	-0.247981	-0.223744	1.72652	1.72652			FALSE				96706851	chr3	96706792	+	hs|3q11.2		chr3:096706792-096706851
A_33_P3243652	-2.64842	-1.40513	2.64842	down	-0.377859	-0.234411	1.09899	1.09899	LOC100131831	uncharacterized LOC100131831	FALSE	Homo sapiens cDNA FLJ26174 fis, clone ADG03920. [AK129685]	100131831		13950921	chr19	13950862	-	hs|19p13.13	AK129685	chr19:13950921-13950862		Hs.625909
A_21_P0009026	-2.51591	-1.33108	2.51591	down	-1.39902	-1.26315	0	0	lnc-ZNF423-1	lnc-ZNF423-1:2	FALSE	LNCipedia lincRNA (lnc-ZNF423-1), lincRNA [lnc-ZNF423-1:2]			49477517	chr16	49477458	-	hs|16q12.1		chr16:49477517-49477458
A_24_P366122	-2.11917	-1.0835	2.11917	down	-1.36689	-1.22022	-0.210054	-0.210054	ACBD4	acyl-CoA binding domain containing 4	FALSE	Homo sapiens acyl-CoA binding domain containing 4 (ACBD4), transcript variant 2, mRNA [NM_024722]	79777	GO:0000062|GO:0008289	43213931	chr17	43213872	+	hs|17q21.31	NM_024722	chr17:43213872-43213931	NM_024722	Hs.110298
A_21_P0014848	-4.04237	-2.0152	4.04237	down	-0.594979	-0.547242	1.44409	1.44409	TMEM165	transmembrane protein 165	FALSE	transmembrane protein 165 [Source:HGNC Symbol;Acc:HGNC:30760] [ENST00000515591]	55858	GO:0005794|GO:0035751|GO:0006874|GO:0005765|GO:0032588|GO:0043231|GO:0000139|GO:0031901|GO:0031902|GO:0006487|GO:0016021|GO:0010008|GO:0032472	56289487	chr4	56289428	+	hs|4q12	AK295063	chr4:56289428-56289487		Hs.662149
A_33_P3401990	-6.10747	-2.61057	6.10747	down	-1.3321	-1.31757	1.28574	1.28574	VPREB3	pre-B lymphocyte 3	FALSE	Homo sapiens pre-B lymphocyte 3 (VPREB3), mRNA [NM_013378]	29802	GO:0005783	24095142	chr22	24095083	-	hs|22q11.23	NM_013378	chr22:24095142-24095083	NM_013378	Hs.136713
A_21_P0000963	-7.54285	-2.91511	7.54285	down	-0.906051	-0.880069	2.02205	2.02205			FALSE				30893832	chr1	30893773	+	hs|1p35.2		chr1:30893773-30893832
A_33_P3322874	-3.90669	-1.96595	3.90669	down	-0.235189	-0.213325	1.74169	1.74169	LINC01159	long intergenic non-protein coding RNA 1159	FALSE	Homo sapiens long intergenic non-protein coding RNA 1159 (LINC01159), transcript variant 2, long non-coding RNA [NR_110374]	102682016		105488775	chr2	105488716	-	hs|2q12.1	NR_110374	chr2:105488775-105488716	NR_110374	Hs.638438
A_33_P3372004	-5.16997	-2.37016	5.16997	down	-0.446993	-0.447299	1.92301	1.92301	IGSF6	immunoglobulin superfamily, member 6	FALSE	Homo sapiens immunoglobulin superfamily, member 6 (IGSF6), mRNA [NM_005849]	10261	GO:0006955|GO:0005887|GO:0007166|GO:0004888	21652742	chr16	21652683	-	hs|16p12.2	NM_005849	chr16:21652742-21652683	NM_005849	Hs.530902
A_23_P254944	-6.44555	-2.6883	6.44555	down	-0.235571	-0.213553	2.46374	2.46374	GSTT1	glutathione S-transferase theta 1	FALSE	Homo sapiens glutathione S-transferase theta 1 (GSTT1), transcript variant 1, mRNA [NM_000853]	2952	GO:0004602|GO:0006805|GO:0006749|GO:0044281|GO:0004364|GO:0070062|GO:0055114|GO:0005829	24376392	chr22	24376333	-	hs|22q11.23	NM_000853	chr22:24376392-24376333	NM_000853	Hs.268573
A_21_P0008034	-10.8875	-3.4446	10.8875	down	-0.209095	-0.208324	3.23589	3.23589	lnc-SGCG-2	lnc-SGCG-2:1	FALSE	LNCipedia lincRNA (lnc-SGCG-2), lincRNA [lnc-SGCG-2:1]			23733535	chr13	23733476	+	hs|13q12.12		chr13:23733476-23733535
A_33_P3382634	-3.4126	-1.77087	3.4126	down	0.00286841	-0.00286841	1.77087	1.77087			FALSE
A_23_P81158	-2.9871	-1.57875	2.9871	down	-1.51642	-1.64108	0	0	ADH1C	alcohol dehydrogenase 1C (class I), gamma polypeptide	FALSE	Homo sapiens alcohol dehydrogenase 1C (class I), gamma polypeptide (ADH1C), mRNA [NM_000669]	126	GO:0004022|GO:0006805|GO:0006069|GO:0008270|GO:0044281|GO:0005829	100260740	chr4	100257881	-	hs|4q23	NM_000669	chr4:100260740-100257881	NM_000669	Hs.654537
A_23_P90743	-5.38929	-2.4301	5.38929	down	-0.161627	-0.194963	2.2518	2.2518	REG1A	regenerating islet-derived 1 alpha	FALSE	Homo sapiens regenerating islet-derived 1 alpha (REG1A), mRNA [NM_002909]	5967	GO:0008284|GO:0030246|GO:0008083|GO:0070062	79350510	chr2	79350451	+	hs|2p12	NM_002909	chr2:79350451-79350510	NM_002909	Hs.49407
A_33_P3300747	-3.49741	-1.80629	3.49741	down	-1.23739	-0.610742	0.882224	0.882224	ADHFE1	alcohol dehydrogenase, iron containing, 1	FALSE	Homo sapiens alcohol dehydrogenase, iron containing, 1 (ADHFE1), mRNA [NM_144650]	137872	GO:0005739|GO:0047988|GO:0005759|GO:0006103|GO:0044281|GO:0046872|GO:0044237|GO:0015993|GO:0055114	67359575	chr8	67359516	+	hs|8q13.1	NM_144650	chr8:67359516-67359575	NM_144650	Hs.720023
A_21_P0012259	-2.06627	-1.04703	2.06627	down	-0.474251	-0.421739	0.599036	0.599036	XLOC_l2_009328		FALSE	BROAD Institute lincRNA (XLOC_l2_009328), lincRNA [TCONS_l2_00017650]			24663060	chr22	24663001	+	hs|22q11.23		chr22:24663001-24663060
A_33_P3237590	-3.55414	-1.8295	3.55414	down	-1.68589	-1.58937	0.191871	0.191871	lnc-ANKH-1	lnc-ANKH-1:3	FALSE	NM_067989 CC8.1 {Caenorhabditis elegans} (exp=-1; wgp=0; cg=0), partial (9%) [THC2506367]			14663329	chr5	14663270	-	hs|5p15.2	AK123396	chr5:14663329-14663270		Hs.550733
A_23_P354341	-5.29155	-2.40369	5.29155	down	-0.120366	-0.203906	2.24156	2.24156	CD160	CD160 molecule	FALSE	Homo sapiens CD160 molecule (CD160), transcript variant 1, mRNA [NM_007053]	11126	GO:0050829|GO:0006968|GO:0005886|GO:0008283|GO:0050776|GO:0005102|GO:0004872|GO:0046658|GO:0007166|GO:0032393	145696465	chr1	145696406	-	hs|1q21.1	NM_007053	chr1:145696465-145696406	NM_007053	Hs.740780
A_21_P0007700	-4.27874	-2.09719	4.27874	down	-0.56553	-0.244471	1.69219	1.69219			FALSE				39481591	chr12	39481532	-	hs|12q12		chr12:39481591-39481532
A_21_P0014140	-2.05869	-1.04172	2.05869	down	-0.468781	-0.70912	0.452773	0.452773			FALSE	Q96UU4_9PEZI (Q96UU4) Subtilase (Fragment), partial (8%) [THC2654600]			16141805	chr5	16141746	+	hs|5p15.1		chr5:016141746-016141805
A_32_P815507	-2.7374	-1.45281	2.7374	down	-1.52746	-1.79487	-0.208355	-0.208355	LOC100130920	uncharacterized LOC100130920	FALSE	Homo sapiens cDNA FLJ36320 fis, clone THYMU2005480. [AK093639]	100130920		6568397	chr10	6568338	-	hs|10p15.1	AK093639	chr10:6568397-6568338		Hs.683904
A_33_P3229370	-2.25937	-1.17592	2.25937	down	0.0317702	-0.12922	1.12719	1.12719	ID4	inhibitor of DNA binding 4, dominant negative helix-loop-helix protein	FALSE	Homo sapiens inhibitor of DNA binding 4, dominant negative helix-loop-helix protein (ID4), mRNA [NM_001546]	3400	GO:0005515|GO:0008284|GO:0022010|GO:0045599|GO:0005634|GO:0007405|GO:0005737|GO:0000082|GO:0045944|GO:0001085|GO:0046983|GO:0045444|GO:0021895|GO:0006357|GO:0003714|GO:0000122|GO:0006351|GO:0045669|GO:0048712|GO:0021766|GO:0045665|GO:0048715|GO:0007623|GO:0034613|GO:0045892	19840900	chr6	19840841	+	hs|6p22.3	NM_001546	chr6:19840841-19840900	NM_001546	Hs.519601
A_21_P0012730	-2.21705	-1.14864	2.21705	down	-1.27405	-1.31252	-0.144637	-0.144637	lnc-BMP2K-1	lnc-BMP2K-1:5	FALSE	LNCipedia lincRNA (lnc-BMP2K-1), lincRNA [lnc-BMP2K-1:5]			80149042	chr4	80148983	+	hs|4q21.21		chr4:80148983-80149042
A_33_P3319860	-10.7819	-3.43055	10.7819	down	-1.2098	-1.45737	2.09696	2.09696	IFFO1	intermediate filament family orphan 1	FALSE	Homo sapiens intermediate filament family orphan 1 (IFFO1), transcript variant 7, non-coding RNA [NR_036467]	25900	GO:0005882	6660662	chr12	6660603	-	hs|12p13.31	NR_036467	chr12:6660662-6660603	NR_036467	Hs.15243
A_33_P3381691	-2.6698	-1.41673	2.6698	down	-1.53633	-1.19303	0.0520518	0.0520518	C20orf62	chromosome 20 open reading frame 62	FALSE	Homo sapiens chromosome 20 open reading frame 62 (C20orf62), mRNA [NM_001287807]	140834		43090463	chr20	43090404	-	hs|20q13.12	NM_001287807	chr20:43090463-43090404	NM_001287807	Hs.357589
A_21_P0005368	-2.98884	-1.57959	2.98884	down	-0.238675	-0.609502	1.1555	1.1555	lnc-GARS-4	lnc-GARS-4:1	FALSE	LNCipedia lincRNA (lnc-GARS-4), lincRNA [lnc-GARS-4:1]			30444192	chr7	30444133	+	hs|7p14.3		chr7:30444133-30444192
A_24_P932416	-2.94085	-1.55623	2.94085	down	-1.28763	-1.56089	0.131973	0.131973	TMEM14E	transmembrane protein 14E	FALSE	Homo sapiens transmembrane protein 14E (TMEM14E), mRNA [NM_001123228]	645843	GO:0016021	152058482	chr3	152058423	-	hs|3q25.1	NM_001123228	chr3:152058482-152058423	NM_001123228	Hs.632562
A_33_P3342260	-2.54584	-1.34814	2.54584	down	-1.41581	-1.43074	-0.0751357	-0.0751357	GCK	glucokinase (hexokinase 4)	FALSE	Homo sapiens glucokinase (hexokinase 4) (GCK), transcript variant 1, mRNA [NM_000162]	2645	GO:0005515|GO:0032811|GO:0043266|GO:0006096|GO:0008645|GO:0015758|GO:0044320|GO:0032024|GO:0019158|GO:0045821|GO:0051156|GO:0032869|GO:0000287|GO:0005975|GO:0019903|GO:0005978|GO:0006739|GO:0070509|GO:0051594|GO:0043531|GO:0046835|GO:0005654|GO:0045180|GO:0001678|GO:0005884|GO:0044281|GO:0007204|GO:0005536|GO:0005829|GO:0005739|GO:0008865|GO:0006006|GO:0042149|GO:0006003|GO:0030141|GO:0045721|GO:…	44183938	chr7	44183879	-	hs|7p13	NM_000162	chr7:44183938-44183879	NM_000162	Hs.1270
A_33_P3416414	-3.0016	-1.58573	3.0016	down	-0.398348	-0.197497	1.28781	1.28781			FALSE	phosphoserine aminotransferase 1 pseudogene 1 [Source:HGNC Symbol;Acc:HGNC:15785] [ENST00000518968]			50652922	chr8	50652863	-	hs|8q11.21		chr8:50652922-50652863
A_24_P4736	-3.76784	-1.91374	3.76784	down	-1.01776	-0.993035	0.908341	0.908341	ODF3	outer dense fiber of sperm tails 3	FALSE	Homo sapiens outer dense fiber of sperm tails 3 (ODF3), transcript variant 1, mRNA [NM_053280]	113746	GO:0007275|GO:0007283|GO:0030154|GO:0001520	198229	chr11	197733	+	hs|11p15.5	NM_053280	chr11:197733-198229	NM_053280	Hs.350949
A_23_P207037	-4.29572	-2.1029	4.29572	down	0.123051	-0.156973	2.08594	2.08594	CD300A	CD300a molecule	FALSE	Homo sapiens CD300a molecule (CD300A), transcript variant 1, mRNA [NM_007261]	11314	GO:0043305|GO:0005515|GO:2000417|GO:0005886|GO:0050856|GO:0008429|GO:0050859|GO:0048147|GO:0030889|GO:0038023|GO:0033007|GO:0060101|GO:0007165|GO:0016020|GO:0043407|GO:0001786|GO:0032516|GO:0051134|GO:0016021|GO:0007155|GO:0070062|GO:0002376	72477929	chr17	72477870	+	hs|17q25.1	NM_007261	chr17:72477870-72477929	NM_007261	Hs.9688
A_23_P218047	-2.06347	-1.04507	2.06347	down	0.0507817	-0.0507817	1.04507	1.04507	KRT5	keratin 5, type II	FALSE	Homo sapiens keratin 5, type II (KRT5), mRNA [NM_000424]	3852	GO:0005515|GO:0005882|GO:0005886|GO:0034329|GO:0005634|GO:0005829|GO:0005739|GO:0005737|GO:0008544|GO:0016020|GO:0097110|GO:0005200|GO:0031581|GO:0045095|GO:0070062	52908681	chr12	52908622	-	hs|12q13.13	NM_000424	chr12:52908681-52908622	NM_000424	Hs.433845
A_33_P3239295	-5.36114	-2.42254	5.36114	down	-0.681426	-0.824234	1.66971	1.66971	PRODH	proline dehydrogenase (oxidase) 1	FALSE	Homo sapiens proline dehydrogenase (oxidase) 1 (PRODH), transcript variant 1, mRNA [NM_016335]	5625	GO:0071949|GO:0034641|GO:0019470|GO:0006560|GO:0005759|GO:0010133|GO:0008631|GO:0006562|GO:0005743|GO:0004657|GO:0044281|GO:0055114	18907024	chr22	18906965	-	hs|22q11.21	NM_016335	chr22:18907024-18906965	NM_016335	Hs.517352
A_21_P0004035	-4.22954	-2.0805	4.22954	down	-0.241343	-0.217398	1.85113	1.85113			FALSE	calpastatin [Source:HGNC Symbol;Acc:HGNC:1515] [ENST00000509602]			95881974	chr5	95881008	+	hs|5q15		chr5:95881008-95881974		Hs.640993
A_23_P99186	-2.76593	-1.46776	2.76593	down	-1.41149	-1.2048	0.159621	0.159621	UBE3B	ubiquitin protein ligase E3B	FALSE	Homo sapiens ubiquitin protein ligase E3B (UBE3B), transcript variant 3, mRNA [NM_183415]	89910	GO:0005737|GO:0004842|GO:0042787|GO:0016874|GO:0005634	109974067	chr12	109974008	+	hs|12q24.11	NM_183415	chr12:109974008-109974067	NM_183415	Hs.374067
A_33_P3329795	-2.63042	-1.39529	2.63042	down	-0.0669911	-0.429428	1.14708	1.14708	SLC22A20	solute carrier family 22, member 20	FALSE	Homo sapiens solute carrier family 22, member 20 (SLC22A20), transcript variant 1, mRNA [NM_001004326]	440044	GO:0022857|GO:0016021|GO:0055085|GO:0006811	64993167	chr11	64993108	+	hs|11q13.1	NM_001004326	chr11:64993108-64993167	NM_001004326	Hs.532372
A_21_P0011894	-2.86795	-1.52002	2.86795	down	-1.1042	-1.43567	0.25009	0.25009	XLOC_l2_007834		FALSE	BROAD Institute lincRNA (XLOC_l2_007834), lincRNA [TCONS_l2_00014341]			242910461	chr2	242910402	+	hs|2q37.3		chr2:242910402-242910461
A_19_P00320411	-4.63954	-2.21398	4.63954	down	-0.226355	-0.211742	1.99493	1.99493	lnc-CXXC5-1	lnc-CXXC5-1:2	FALSE	LNCipedia lincRNA (lnc-CXXC5-1), lincRNA [lnc-CXXC5-1:2]			139124826	chr5	139124767	+	hs|5q31.2		chr5:139124767-139124826
A_33_P3347343	-4.09273	-2.03306	4.09273	down	-2.01995	-2.04617	0	0	CCDC102B	coiled-coil domain containing 102B	FALSE	Homo sapiens coiled-coil domain containing 102B (CCDC102B), transcript variant 1, mRNA [NM_001093729]	79839		66564657	chr18	66564598	+	hs|18q22.1	NM_001093729	chr18:66564598-66564657	NM_001093729	Hs.280781
A_32_P121834	-4.39374	-2.13545	4.39374	down	-0.133252	-0.170003	1.98382	1.98382	IQCF1	IQ motif containing F1	FALSE	Homo sapiens IQ motif containing F1 (IQCF1), mRNA [NM_152397]	132141		51928968	chr3	51928909	-	hs|3p21.2	NM_152397	chr3:51928968-51928909	NM_152397	Hs.671210
A_24_P44992	-9.11007	-3.18746	9.11007	down	-0.223369	-0.194956	2.9783	2.9783			FALSE	zinc finger protein 663, pseudogene [Source:HGNC Symbol;Acc:HGNC:25342] [ENST00000400371]			45043369	chr20	45043310	-	hs|20q13.12	AL831934	chr20:45043369-45043310
A_33_P3307223	-5.17374	-2.37121	5.17374	down	-0.243377	-0.219135	2.13995	2.13995			FALSE	Homo sapiens cDNA FLJ46347 fis, clone TESTI4047437. [AK128215]			175200660	chr2	175200601	-	hs|2q31.1	AK128215	chr2:175200660-175200601
A_19_P00319803	-2.27644	-1.18678	2.27644	down	-1.03398	-0.933033	0.203269	0.203269	LOC202181	SUMO-interacting motifs containing 1 pseudogene	FALSE	Homo sapiens SUMO-interacting motifs containing 1 pseudogene (LOC202181), non-coding RNA [NR_026921]	202181		177046276	chr5	177046217	-	hs|5q35.3	NR_026921	chr5:177046276-177046217	NR_026921	Hs.653052
A_33_P3291524	-5.92155	-2.56597	5.92155	down	-0.51816	0.254014	2.4339	2.4339	ZNF534	zinc finger protein 534	FALSE	Homo sapiens zinc finger protein 534 (ZNF534), transcript variant 2, mRNA [NM_001143939]	147658	GO:0006355|GO:0003700|GO:0005634|GO:0003677|GO:0046872|GO:0006351	52942698	chr19	52942639	+	hs|19q13.41	NM_001143939	chr19:52942639-52942698	NM_001143939	Hs.447583
A_21_P0000947	-2.1173	-1.08223	2.1173	down	-0.722165	-1.04049	0.200903	0.200903	lnc-CA6-1	lnc-CA6-1:1	FALSE	AGENCOURT_10396508 NIH_MGC_141 Homo sapiens cDNA clone IMAGE:6605580 5', mRNA sequence [BU566406]			8939950	chr1	8939891	+	hs|1p36.23		chr1:8939891-8939950		Hs.429843
A_33_P3241051	-5.39208	-2.43084	5.39208	down	-0.230672	-0.212741	2.20914	2.20914	ADAMTS17	ADAM metallopeptidase with thrombospondin type 1 motif, 17	FALSE	Homo sapiens ADAM metallopeptidase with thrombospondin type 1 motif, 17 (ADAMTS17), mRNA [NM_139057]	170691	GO:0006508|GO:0005578|GO:0008270|GO:0004222	100511813	chr15	100511754	-	hs|15q26.3	NM_139057	chr15:100511813-100511754	NM_139057	Hs.513200
A_33_P3245163	-5.29129	-2.40362	5.29129	down	-0.255916	-0.230249	2.16054	2.16054	MYC	v-myc avian myelocytomatosis viral oncogene homolog	FALSE	Human c-myc-P64 mRNA, initiating from promoter P0, (HLmyc3.1) partial cds. [M13930]	4609	GO:0005515|GO:0010468|GO:0010467|GO:0001658|GO:0006367|GO:0003700|GO:2001022|GO:0032403|GO:0006879|GO:0034644|GO:0007219|GO:0045656|GO:0000165|GO:0046983|GO:0007179|GO:0051782|GO:0010332|GO:0090096|GO:0050679|GO:0070888|GO:0000122|GO:0070848|GO:0000978|GO:0043280|GO:0043234|GO:0005654|GO:0045893|GO:0008134|GO:0008284|GO:0051276|GO:2000573|GO:0048147|GO:0005634|GO:0048146|GO:0032873|GO:0005829|GO:…	128748135	chr8	128748076	+	hs|8q24.21	M13930	chr8:128748076-128748135		Hs.202453
A_21_P0005483	-7.2975	-2.8674	7.2975	down	0.0751095	-0.910171	2.44987	2.44987	lnc-KIAA0087-1	lnc-KIAA0087-1:1	FALSE	LNCipedia lincRNA (lnc-KIAA0087-1), lincRNA [lnc-KIAA0087-1:1]			26590507	chr7	26590448	-	hs|7p15.2		chr7:26590507-26590448
A_33_P3354940	-2.02969	-1.02126	2.02969	down	0.35842	0.685971	1.54346	1.54346	CSF1	colony stimulating factor 1 (macrophage)	FALSE	Homo sapiens colony stimulating factor 1 (macrophage) (CSF1), transcript variant 1, mRNA [NM_000757]	1435	GO:0048471|GO:0008284|GO:0005886|GO:0008283|GO:0005157|GO:0046579|GO:0005615|GO:0042803|GO:0030154|GO:0048873|GO:0006954|GO:0030278|GO:0045657|GO:0045860|GO:0042476|GO:0030225|GO:0040018|GO:0002158|GO:0070062|GO:0030097|GO:0030335|GO:0010744|GO:0010743|GO:0030316|GO:0045672|GO:0060763|GO:0045651|GO:0005125|GO:0043235|GO:0010628|GO:0003006|GO:0032270|GO:0032946|GO:0001503|GO:0016020|GO:0042117|GO:…	110472299	chr1	110472240	+	hs|1p13.3	NM_000757	chr1:110472240-110472299	NM_000757	Hs.173894
A_21_P0007790	-3.24394	-1.69775	3.24394	down	-0.116283	-0.0846205	1.59729	1.59729	LINC00944	long intergenic non-protein coding RNA 944	FALSE	long intergenic non-protein coding RNA 944 [Source:HGNC Symbol;Acc:HGNC:48640] [ENST00000542248]	387895		127245553	chr12	127245494	-	hs|12q24.32		chr12:127245553-127245494
A_21_P0013615	-2.91952	-1.54573	2.91952	down	-0.445887	-0.802417	0.92158	0.92158	XLOC_l2_015098		FALSE	BROAD Institute lincRNA (XLOC_l2_015098), lincRNA [TCONS_l2_00029170]			2422404	chr9	2422345	-	hs|9p24.2		chr9:2422404-2422345
A_21_P0012598	-2.14444	-1.1006	2.14444	down	-1.06707	-1.26573	-0.0657973	-0.0657973	XLOC_l2_010724		FALSE	BROAD Institute lincRNA (XLOC_l2_010724), lincRNA [TCONS_l2_00020599]			80131901	chr4	80131842	+	hs|4q21.21		chr4:80131842-80131901
A_21_P0011198	-8.59523	-3.10354	8.59523	down	-0.604903	-0.580571	2.5108	2.5108			FALSE	estrogen-related receptor alpha pseudogene 2 [Source:HGNC Symbol;Acc:HGNC:24647] [ENST00000427890]			21867562	chr13	21866934	+	hs|13q12.11		chr13:21866934-21867562
A_21_P0010081	-8.25207	-3.04476	8.25207	down	-0.769097	-0.744752	2.28783	2.28783	lnc-SPTLC3-1	lnc-SPTLC3-1:2	FALSE	LNCipedia lincRNA (lnc-SPTLC3-1), lincRNA [lnc-SPTLC3-1:2]			12947704	chr20	12946772	+	hs|20p12.1		chr20:12946772-12947704
A_21_P0004885	-2.06125	-1.04352	2.06125	down	-0.54002	-0.278904	0.634057	0.634057	lnc-RUNX2-2	lnc-RUNX2-2:1	FALSE	LNCipedia lincRNA (lnc-RUNX2-2), lincRNA [lnc-RUNX2-2:1]			45634338	chr6	45634279	+	hs|6p21.1		chr6:45634279-45634338
A_24_P119678	-5.00484	-2.32332	5.00484	down	-0.112948	-0.206417	2.16364	2.16364			FALSE	Homo sapiens mRNA for hypothetical protein (ORF1), clone Telethon(Italy_B41)_Strait14635_FL303. [AJ295982]			236890269	chr1	236890210	+	hs|1q43	AJ295982	chr1:236890210-236890269
A_23_P47181	-8.19113	-3.03406	8.19113	down	-1.21714	-1.46145	1.69477	1.69477	GPHA2	glycoprotein hormone alpha 2	FALSE	Homo sapiens glycoprotein hormone alpha 2 (GPHA2), mRNA [NM_130769]	170589	GO:0005179|GO:0005576	64702516	chr11	64702341	-	hs|11q13.1	NM_130769	chr11:64702516-64702341	NM_130769	Hs.436119
A_23_P17548	-13.2295	-3.72568	13.2295	down	-0.243854	-0.219508	3.494	3.494	DEFB118	defensin, beta 118	FALSE	Homo sapiens defensin, beta 118 (DEFB118), mRNA [NM_054112]	117285	GO:0009986|GO:0007160|GO:0045087|GO:0005576|GO:0007283|GO:0042742	29960872	chr20	29960813	+	hs|20q11.21	NM_054112	chr20:29960813-29960872	NM_054112	Hs.274124
A_33_P3256317	-7.18034	-2.84405	7.18034	down	-0.547811	-0.523295	2.3085	2.3085	MYT1L-AS1	MYT1L antisense RNA 1	FALSE	Homo sapiens MYT1L antisense RNA 1 (MYT1L-AS1), long non-coding RNA [NR_024468]	730811		2330841	chr2	2330782	+	hs|2p25.3	NR_024468	chr2:2330782-2330841	NR_024468	Hs.629472
A_32_P158083	-14.0696	-3.81451	14.0696	down	-0.241151	-0.216714	3.58558	3.58558	LHFPL3	lipoma HMGIC fusion partner-like 3	FALSE	Homo sapiens lipoma HMGIC fusion partner-like 3 (LHFPL3), mRNA [NM_199000]	375612	GO:0016021	104548751	chr7	104548692	+	hs|7q22.3	NM_199000	chr7:104548692-104548751	NM_199000	Hs.659164
A_21_P0002032	-3.88185	-1.95674	3.88185	down	-0.240875	-0.216488	1.72806	1.72806			FALSE				23580446	chr2	23580387	-	hs|2p24.1		chr2:23580446-23580387
A_21_P0014004	-4.1052	-2.03745	4.1052	down	-1.93364	-1.747	0.197134	0.197134	RAB44	RAB44, member RAS oncogene family	FALSE	Homo sapiens RAB44, member RAS oncogene family (RAB44), mRNA [NM_001257357]	401258	GO:0006184|GO:0009306|GO:0005886|GO:0017157|GO:0003924|GO:0032482|GO:0019003|GO:0005525|GO:0006886|GO:0012505|GO:0006904	36685050	chr6	36683375	+	hs|6p21.2	NM_001257357	chr6:36683375-36685050	NM_001257357	Hs.485258
A_33_P3423984	-4.98811	-2.31849	4.98811	down	0.129089	-0.12909	2.31849	2.31849	PALLD	palladin, cytoskeletal associated protein	FALSE	palladin, cytoskeletal associated protein [Source:HGNC Symbol;Acc:HGNC:17068] [ENST00000508898]	23022	GO:0005515|GO:0030018|GO:0005886|GO:0005884|GO:0003779|GO:0005634|GO:0015629|GO:0001726|GO:0030027|GO:0005739|GO:0051371|GO:0005737|GO:0007010|GO:0005925	169621266	chr4	169621207	+	hs|4q32.3	AK096458	chr4:169621207-169621266		Hs.151220
A_23_P86386	-5.94833	-2.57248	5.94833	down	-0.246383	0.242754	2.57067	2.57067	ZNF669	zinc finger protein 669	FALSE	Homo sapiens zinc finger protein 669 (ZNF669), transcript variant 1, mRNA [NM_024804]	79862	GO:0006355|GO:0005634|GO:0003677|GO:0046872|GO:0006351	247264316	chr1	247264257	-	hs|1q44	NM_024804	chr1:247264316-247264257	NM_024804	Hs.163754
A_21_P0007348	-7.82227	-2.96759	7.82227	down	-0.243552	-0.218974	2.73633	2.73633	lnc-TP53I11-2	lnc-TP53I11-2:1	FALSE	LNCipedia lincRNA (lnc-TP53I11-2), lincRNA [lnc-TP53I11-2:1]			45029686	chr11	45029627	-	hs|11p11.2		chr11:45029686-45029627
A_21_P0004656	-6.68736	-2.74144	6.68736	down	-0.242954	-0.218279	2.51082	2.51082	MLIP-IT1	MLIP intronic transcript 1 (non-protein coding)	FALSE	Homo sapiens MLIP intronic transcript 1 (non-protein coding) (MLIP-IT1), long non-coding RNA [NR_046832]	100874282		53871909	chr6	53871850	+	hs|6p12.1		chr6:53871850-53871909	NR_046832	Hs.571169
A_33_P3214720	-3.26529	-1.70721	3.26529	down	0.394047	0.852284	2.33038	2.33038	ZC3H12A	zinc finger CCCH-type containing 12A	FALSE	Homo sapiens zinc finger CCCH-type containing 12A (ZC3H12A), mRNA [NM_025079]	80149	GO:0005515|GO:0090305|GO:0005886|GO:0032715|GO:0043031|GO:0032720|GO:0006915|GO:0010884|GO:0032088|GO:0001525|GO:0046872|GO:0030154|GO:0010628|GO:0005737|GO:0071222|GO:0004519|GO:0045019|GO:0010629|GO:0045600|GO:0005654|GO:2000379|GO:0010508	37949767	chr1	37949708	+	hs|1p34.3	NM_025079	chr1:37949708-37949767	NM_025079	Hs.656294
A_33_P3211327	-2.10393	-1.07309	2.10393	down	-1.13535	-1.01082	0	0	TMEM262	transmembrane protein 262	FALSE	transmembrane protein 262 [Source:HGNC Symbol;Acc:HGNC:49389] [ENST00000334821]	100130348	GO:0016021	64856163	chr11	64856104	-	hs|11q13.1	AK124141	chr11:64856163-64856104		Hs.98170
A_33_P3232945	-2.90626	-1.53916	2.90626	down	-0.89405	-1.20519	0.489542	0.489542	F2RL1	coagulation factor II (thrombin) receptor-like 1	FALSE	Homo sapiens coagulation factor II (thrombin) receptor-like 1 (F2RL1), mRNA [NM_005242]	2150	GO:0005515|GO:0043311|GO:0070963|GO:0046330|GO:0050900|GO:0060100|GO:0046328|GO:0051607|GO:0046329|GO:0030836|GO:0031274|GO:0070374|GO:0043123|GO:0090195|GO:0043122|GO:2000484|GO:0090198|GO:0072608|GO:0031681|GO:0030335|GO:0005794|GO:0004930|GO:0050702|GO:0014068|GO:0010804|GO:0072643|GO:0007186|GO:0005887|GO:0045087|GO:0042119|GO:0034145|GO:0005886|GO:0034141|GO:0015057|GO:0034140|GO:0035025|GO:…	76131044	chr5	76130985	+	hs|5q13.3	NM_005242	chr5:76130985-76131044	NM_005242	Hs.744181
A_33_P3369441	-3.38146	-1.75765	3.38146	down	-0.504355	-0.744435	1.13325	1.13325	LOC100132111	uncharacterized LOC100132111	FALSE	Homo sapiens uncharacterized LOC100132111 (LOC100132111), long non-coding RNA [NR_024237]	100132111		151814506	chr1	151814447	+	hs|1q21.3	NR_024237	chr1:151814447-151814506	NR_024237	Hs.697059
A_23_P210763	-2.00997	-1.00717	2.00997	down	-0.924028	-1.11973	-0.014703	-0.014703	JAG1	jagged 1	FALSE	Homo sapiens jagged 1 (JAG1), mRNA [NM_000214]	182	GO:0005515|GO:0007220|GO:0005886|GO:0045599|GO:0003184|GO:0005112|GO:0072017|GO:0003215|GO:0061073|GO:2000737|GO:0061314|GO:0045639|GO:0007219|GO:0045944|GO:0042127|GO:0045445|GO:0045446|GO:0097150|GO:0045747|GO:0030097|GO:0030334|GO:0042491|GO:0002011|GO:0001709|GO:0060411|GO:0005509|GO:0035909|GO:0045177|GO:0005576|GO:0061444|GO:0001525|GO:0007399|GO:0045669|GO:0061156|GO:0045665|GO:0016020|GO:…	10619120	chr20	10619061	-	hs|20p12.2	NM_000214	chr20:10619120-10619061	NM_000214	Hs.626544
A_21_P0012885	-4.88536	-2.28847	4.88536	down	-1.08589	-0.694686	1.39818	1.39818			FALSE	Homo sapiens cDNA FLJ60532 complete cds, moderately similar to Programmed cell death protein 6. [AK295082]			1602741	chr5	1602682	-	hs|5p15.33		chr5:1602741-1602682		Hs.50823
A_21_P0002487	-9.13895	-3.19203	9.13895	down	-0.243971	-0.219297	2.96039	2.96039	lnc-EDAR-7	lnc-EDAR-7:1	FALSE	LNCipedia lincRNA (lnc-EDAR-7), lincRNA [lnc-EDAR-7:1]			108683817	chr2	108683758	-	hs|2q12.3		chr2:108683817-108683758
A_24_P164998	-7.37889	-2.8834	7.37889	down	-0.144642	-0.167919	2.72712	2.72712	LYPD8	LY6/PLAUR domain containing 8	FALSE	Homo sapiens LY6/PLAUR domain containing 8 (LYPD8), transcript variant 1, mRNA [NM_001085474]	646627	GO:0005886|GO:0031225	248903187	chr1	248903128	-	hs|1q44	NM_001085474	chr1:248903187-248903128	NM_001085474	Hs.632511
A_21_P0010385	-5.39548	-2.43175	5.39548	down	-0.30531	-0.280723	2.13874	2.13874			FALSE	AGENCOURT_8943761 NIH_MGC_142 Homo sapiens cDNA clone IMAGE:6453069 5', mRNA sequence [BU596489]			46272224	chr22	46272165	-	hs|22q13.31		chr22:46272224-46272165		Hs.534982
A_21_P0004791	-7.36456	-2.8806	7.36456	down	-0.244256	-0.219561	2.64869	2.64869			FALSE				153115770	chr6	153115711	-	hs|6q25.2		chr6:153115770-153115711
A_23_P429998	-3.06363	-1.61524	3.06363	down	-0.466516	-0.755638	1.00416	1.00416	FOSB	FBJ murine osteosarcoma viral oncogene homolog B	FALSE	Homo sapiens FBJ murine osteosarcoma viral oncogene homolog B (FOSB), transcript variant 1, mRNA [NM_006732]	2354	GO:0051412|GO:0007565|GO:0003700|GO:0006366|GO:0042493|GO:0005634|GO:0043278|GO:0000122|GO:0051591|GO:0003677|GO:0032870|GO:0009612|GO:0043565|GO:0003690|GO:0071277|GO:0032570|GO:0008134	45978264	chr19	45978205	+	hs|19q13.32	NM_006732	chr19:45978205-45978264	NM_006732	Hs.590958
A_32_P468743	-12.6221	-3.65789	12.6221	down	-0.21313	-0.18541	3.45862	3.45862	ODF3L1	outer dense fiber of sperm tails 3-like 1	FALSE	Homo sapiens outer dense fiber of sperm tails 3-like 1 (ODF3L1), mRNA [NM_175881]	161753		76019969	chr15	76019910	+	hs|15q24.2	NM_175881	chr15:76019910-76019969	NM_175881	Hs.144348
A_21_P0014176	-5.73008	-2.51856	5.73008	down	-0.244048	-0.219303	2.28688	2.28688			FALSE	PREDICTED: Homo sapiens uncharacterized LOC100506534 (LOC100506534), misc_RNA [XR_132856]			157296283	chr7	157296224	+	hs|7q36.3	XR_132856	chr7:157296224-157296283		Hs.571393
A_33_P3403048	-2.85628	-1.51414	2.85628	down	-0.333474	-0.311369	1.19172	1.19172			FALSE	Homo sapiens cDNA FLJ52225 complete cds, moderately similar to S-adenosylmethionine synthetase isoform type-2 (EC 2.5.1.6). [AK294208]			85770731	chr2	85770672	+	hs|2p11.2	AK294208	chr2:85770672-85770731		Hs.516157
A_33_P3262973	-2.21308	-1.14606	2.21308	down	-1.48534	-1.53359	-0.36341	-0.36341			FALSE				3135828	chr2	3135769	-	hs|2p25.3		chr2:3135828-3135769		Hs.447991
A_33_P3221333	-9.78488	-3.29055	9.78488	down	-0.202878	-0.175361	3.10143	3.10143			FALSE	olfactory receptor, family 5, subfamily M, member 13 pseudogene [Source:HGNC Symbol;Acc:HGNC:15293] [ENST00000433944]			56365553	chr11	56365494	-	hs|11q12.1		chr11:56365553-56365494
A_33_P3307887	-5.96788	-2.57722	5.96788	down	-0.220388	-0.214156	2.35995	2.35995	LOC100128653	uncharacterized LOC100128653	FALSE	PREDICTED: Homo sapiens uncharacterized LOC100128653 (LOC100128653), misc_RNA [XR_108727]	100128653		1573949	chr7	1573890	-	hs|7p22.3	XR_108727	chr7:1573949-1573890	XR_108727	Hs.656985
A_21_P0007228	-9.06235	-3.17988	9.06235	down	-0.244329	-0.21958	2.94793	2.94793	lnc-MYEOV-3	lnc-MYEOV-3:1	FALSE	LNCipedia lincRNA (lnc-MYEOV-3), lincRNA [lnc-MYEOV-3:1]			69003165	chr11	69003106	+	hs|11q13.3		chr11:69003106-69003165
A_21_P0001230	-5.18662	-2.37479	5.18662	down	-0.294965	-0.289522	2.08255	2.08255	LOC101927143	uncharacterized LOC101927143	FALSE	Homo sapiens uncharacterized LOC101927143 (LOC101927143), long non-coding RNA [NR_110669]	101927143		224400580	chr1	224400521	-	hs|1q42.11		chr1:224400580-224400521	NR_110669	Hs.638720
A_21_P0007141	-7.56466	-2.91928	7.56466	down	-1.34854	-0.665487	1.91226	1.91226	lnc-OR51B6-1	lnc-OR51B6-1:1	FALSE	LNCipedia lincRNA (lnc-OR51B6-1), lincRNA [lnc-OR51B6-1:1]			5228477	chr11	5228418	+	hs|11p15.4		chr11:5228418-5228477
A_21_P0007604	-6.47478	-2.69483	6.47478	down	-0.260897	-0.234283	2.44724	2.44724			FALSE				91204354	chr12	91203791	+	hs|12q21.33		chr12:91203791-91204354
A_33_P3423530	-4.76175	-2.25149	4.76175	down	-0.244615	-0.219916	2.01923	2.01923	TPK1	thiamin pyrophosphokinase 1	FALSE	thiamin pyrophosphokinase 1 [Source:HGNC Symbol;Acc:HGNC:17358] [ENST00000482940]	27010	GO:0004788|GO:0016310|GO:0009229|GO:0006772|GO:0016301|GO:0006766|GO:0006767|GO:0044281|GO:0042723|GO:0030975|GO:0005524|GO:0005829	144228217	chr7	144228158	-	hs|7q35	BC040555	chr7:144228217-144228158
A_21_P0004736	-3.42897	-1.77778	3.42897	down	-0.204511	-0.653626	1.34871	1.34871	LOC100506885	uncharacterized LOC100506885	FALSE		100506885		19803897	chr6	19803838	-	hs|6p22.3		chr6:19803897-19803838		Hs.346489
A_23_P207564	-4.57098	-2.1925	4.57098	down	-1.48339	-1.56854	0.666537	0.666537	CCL4L2	chemokine (C-C motif) ligand 4-like 2	FALSE	Homo sapiens chemokine (C-C motif) ligand 4-like 2 (CCL4L2), transcript variant CCL4L2b2, mRNA [NM_001291470]	9560		34540043	chr17	34539984	+	hs|17q12	NM_001291470	chr17:34539984-34540043	NM_001291470	Hs.449862
A_21_P0013969	-8.76543	-3.13182	8.76543	down	-0.485969	-0.462474	2.6576	2.6576	LOC100130156	uncharacterized LOC100130156	FALSE	Homo sapiens cDNA FLJ40209 fis, clone TESTI2020999. [AK097528]	100130156		52803813	chr20	52803754	+	hs|20q13.2	AK097528	chr20:52803754-52803813		Hs.683812
A_21_P0006456	-12.2997	-3.62055	12.2997	down	-0.253344	-0.229495	3.37914	3.37914	XIST	X inactive specific transcript (non-protein coding)	FALSE	X inactive specific transcript (non-protein coding) [Source:HGNC Symbol;Acc:HGNC:12810] [ENST00000433732]	7503		73049075	chrX	73049016	-	hs|Xq13.2		chrX:73049075-73049016
A_23_P78867	-3.56682	-1.83464	3.56682	down	-0.353413	0.0981331	1.707	1.707	RYR1	ryanodine receptor 1 (skeletal)	FALSE	Homo sapiens ryanodine receptor 1 (skeletal) (RYR1), transcript variant 1, mRNA [NM_000540]	6261	GO:0005515|GO:0005516|GO:0043931|GO:0005886|GO:0002020|GO:0014701|GO:0005737|GO:0034220|GO:0006936|GO:0031000|GO:0015278|GO:0006816|GO:0005938|GO:0070062|GO:0001666|GO:0005262|GO:0051209|GO:0005245|GO:0014802|GO:0051480|GO:0030314|GO:0071313|GO:0048741|GO:0030315|GO:0033017|GO:0014808|GO:0055085|GO:0003151|GO:0005790|GO:0016529|GO:0005887|GO:0070588|GO:0043588|GO:0005219|GO:0031674	39078024	chr19	39077965	+	hs|19q13.2	NM_000540	chr19:39077965-39078024	NM_000540	Hs.466664
A_33_P3273623	-6.35982	-2.66899	6.35982	down	-0.256118	-0.231725	2.42506	2.42506	CCL21	chemokine (C-C motif) ligand 21	FALSE	Homo sapiens chemokine (C-C motif) ligand 21 (CCL21), mRNA [NM_002989]	6366	GO:0051897|GO:0031295|GO:0046330|GO:0007267|GO:0051491|GO:0005615|GO:2000147|GO:0097026|GO:0031529|GO:0006955|GO:0006954|GO:0050921|GO:0030838|GO:0034695|GO:0043552|GO:0045860|GO:0031274|GO:0048469|GO:0070374|GO:0043123|GO:0008009|GO:0001771|GO:2000406|GO:0051209|GO:2000529|GO:2000548|GO:0002407|GO:0033630|GO:0005576|GO:0042379|GO:0032862|GO:0002606|GO:0010560|GO:0007186|GO:2000107|GO:0060326|GO:…	34709633	chr9	34709574	-	hs|9p13.3	NM_002989	chr9:34709633-34709574	NM_002989	Hs.57907
A_19_P00322745	-2.89686	-1.53449	2.89686	down	-1.8193	-1.93283	-0.341574	-0.341574			FALSE	PREDICTED: Homo sapiens uncharacterized LOC101928011 (LOC101928011), ncRNA [XR_244302]			29818670	chr21	29818611	-	hs|21q21.3	XR_244302	chr21:29818670-29818611	XR_244302	Hs.685200
A_33_P3238969	-3.967	-1.98805	3.967	down	-0.128621	-0.104252	1.87161	1.87161	ONECUT3	one cut homeobox 3	FALSE	Homo sapiens one cut homeobox 3 (ONECUT3), mRNA [NM_001080488]	390874	GO:0005667|GO:0001077|GO:0000977|GO:0045944|GO:0031018|GO:0005634|GO:0003677|GO:0048731|GO:0030154|GO:0006351	1775352	chr19	1775293	+	hs|19p13.3	NM_001080488	chr19:1775293-1775352	NM_001080488	Hs.654347
A_33_P3383491	-21.8676	-4.45072	21.8676	down	-0.253008	-0.230283	4.20908	4.20908	ENPP7	ectonucleotide pyrophosphatase/phosphodiesterase 7	FALSE	Homo sapiens ectonucleotide pyrophosphatase/phosphodiesterase 7 (ENPP7), mRNA [NM_178543]	339221	GO:0006665|GO:0006685|GO:0005794|GO:0006684|GO:0008285|GO:0005886|GO:0006687|GO:0004767|GO:0044281|GO:0005902|GO:0016020|GO:0008156|GO:0016021	77710901	chr17	77710842	+	hs|17q25.3	NM_178543	chr17:77710842-77710901	NM_178543	Hs.114084
A_23_P351467	-2.31412	-1.21046	2.31412	down	-1.39074	-1.03018	0	0	CMAHP	cytidine monophospho-N-acetylneuraminic acid hydroxylase, pseudogene	FALSE	Homo sapiens cytidine monophospho-N-acetylneuraminic acid hydroxylase, pseudogene (CMAHP), transcript variant 1, non-coding RNA [NR_002174]	8418	GO:0008150|GO:0005737|GO:0051537|GO:0046381|GO:0030338|GO:0055114	25081948	chr6	25081889	-	hs|6p22.3	NR_002174	chr6:25081948-25081889	NR_002174	Hs.484918
A_33_P3359120	-14.0543	-3.81294	14.0543	down	-0.229417	-0.215781	3.59034	3.59034			FALSE	vomeronasal 1 receptor 64 pseudogene [Source:HGNC Symbol;Acc:HGNC:37384] [ENST00000424940]			31558944	chr16	31558885	+	hs|16p11.2		chr16:31558885-31558944
A_21_P0005457	-11.283	-3.49608	11.283	down	-0.119554	-0.144197	3.3642	3.3642	lnc-WDR60-3	lnc-WDR60-3:2	FALSE	LNCipedia lincRNA (lnc-WDR60-3), lincRNA [lnc-WDR60-3:2]			158775602	chr7	158775543	+	hs|7q36.3		chr7:158775543-158775602
A_21_P0007916	-2.06643	-1.04714	2.06643	down	-0.946034	-1.14825	0	0	DNAJC3-AS1	DNAJC3 antisense RNA 1 (head to head)	FALSE	DNAJC3 antisense RNA 1 (head to head) [Source:HGNC Symbol;Acc:HGNC:39808] [ENST00000499499]	100289274		96325258	chr13	96325199	-	hs|13q32.1	XR_172013	chr13:96325258-96325199	XR_172013	Hs.594844
A_32_P143880	-2.34173	-1.22758	2.34173	down	-0.052717	-0.0959461	1.15325	1.15325	MEMO1	mediator of cell motility 1	FALSE	Homo sapiens mediator of cell motility 1 (MEMO1), transcript variant 1, mRNA [NM_015955]	51072	GO:0005515|GO:0032886|GO:0005634|GO:0005829	32093542	chr2	32093483	-	hs|2p23.1	NM_015955	chr2:32093542-32093483	NM_015955	Hs.444969
A_21_P0002794	-6.45223	-2.6898	6.45223	down	-0.38279	-0.405863	2.29547	2.29547			FALSE	AV712581 DCA Homo sapiens cDNA clone DCAAUH07 5', mRNA sequence [AV712581]			167601061	chr3	167601002	+	hs|3q26.2		chr3:167601002-167601061		Hs.575028
A_21_P0014289	-11.9584	-3.57995	11.9584	down	-0.56136	-0.464428	3.06705	3.06705	LOC101060553	uncharacterized LOC101060553	FALSE	Homo sapiens uncharacterized LOC101060553 (LOC101060553), long non-coding RNA [NR_120398]	101060553		111800603	chr13	111800544	-	hs|13q34	NR_120398	chr13:111800603-111800544	NR_120398	Hs.662213
A_21_P0001321	-8.63454	-3.11012	8.63454	down	-0.721368	-0.99576	2.25155	2.25155	LINC01360	long intergenic non-protein coding RNA 1360	FALSE	long intergenic non-protein coding RNA 1360 [Source:HGNC Symbol;Acc:HGNC:50593] [ENST00000444827]	101927295		73813934	chr1	73813875	+	hs|1p31.1		chr1:73813875-73813934		Hs.576114
A_21_P0006188	-15.07	-3.9136	15.07	down	-0.575272	-0.478014	3.38696	3.38696	lnc-C9orf102-4	lnc-C9orf102-4:2	FALSE	LNCipedia lincRNA (lnc-C9orf102-4), lincRNA [lnc-C9orf102-4:2]			98894473	chr9	98894414	+	hs|9q22.32		chr9:98894414-98894473
A_21_P0003381	-4.1289	-2.04576	4.1289	down	-0.243706	-0.21896	1.81442	1.81442			FALSE	DB051028 TESTI2 Homo sapiens cDNA clone TESTI2040780 5', mRNA sequence [DB051028]			92825482	chr4	92825423	+	hs|4q22.1		chr4:92825423-92825482		Hs.581824
A_21_P0013195	-3.05505	-1.6112	3.05505	down	-1.59154	-1.03797	0.296441	0.296441	2019-09-14	septin 14	FALSE	Homo sapiens septin 14 (SEPT14), mRNA [NM_207366]	346288	GO:0005515|GO:0007049|GO:0005737|GO:0005856|GO:0005525|GO:0051301	55861840	chr7	55861781	-	hs|7p11.2		chr7:55861840-55861781	NM_207366	Hs.453629
A_21_P0004102	-9.96902	-3.31745	9.96902	down	-0.260707	-0.234478	3.06986	3.06986			FALSE	HY000609 RIKEN full-length enriched human cDNA library, testis Homo sapiens cDNA clone H04D002N21, mRNA sequence [HY000609]			12571989	chr5	12571930	-	hs|5p15.2		chr5:12571989-12571930		Hs.742645
A_21_P0004260	-3.84461	-1.94284	3.84461	down	-0.576535	-0.991359	1.15889	1.15889	lnc-PIK3R1-3	lnc-PIK3R1-3:1	FALSE	LNCipedia lincRNA (lnc-PIK3R1-3), lincRNA [lnc-PIK3R1-3:1]			67807616	chr5	67807557	+	hs|5q13.1		chr5:67807557-67807616
A_21_P0013506	-8.43951	-3.07716	8.43951	down	-0.326938	-0.880524	2.47343	2.47343	XLOC_l2_014423		FALSE	BROAD Institute lincRNA (XLOC_l2_014423), lincRNA [TCONS_l2_00028088]			8091599	chr8	8091540	-	hs|8p23.1		chr8:8091599-8091540
A_21_P0014818	-12.2478	-3.61445	12.2478	down	-0.282778	-0.256542	3.34479	3.34479	AZFP	AML-associated zinc finger protein	FALSE	Homo sapiens AML-associated zinc finger protein (AZFP) mRNA, partial cds. [AY371499]	100128406		133089727	chr2	133089668	-	hs|2q21.2	AY371499	chr2:133089727-133089668		Hs.654329
A_33_P3314291	-14.2459	-3.83248	14.2459	down	-0.686495	-0.66455	3.15696	3.15696			FALSE	DB307521 BRCOC2 Homo sapiens cDNA clone BRCOC2019652 3', mRNA sequence [DB307521]			126568303	chr5	126568244	+	hs|5q23.2	DB307521	chr5:126568244-126568303		Hs.630244
A_23_P218111	-3.14103	-1.65124	3.14103	down	-0.904238	-1.28751	0.555362	0.555362	SERPINA1	serpin peptidase inhibitor, clade A (alpha-1 antiproteinase, antitrypsin), member 1	FALSE	Homo sapiens serpin peptidase inhibitor, clade A (alpha-1 antiproteinase, antitrypsin), member 1 (SERPINA1), transcript variant 2, mRNA [NM_001002236]	5265	GO:0005515|GO:0005783|GO:0004867|GO:0002020|GO:0005615|GO:0042802|GO:0001948|GO:0034014|GO:0032496|GO:1900004|GO:0031093|GO:0034097|GO:0032355|GO:0070062|GO:0001666|GO:0010288|GO:0033986|GO:0005794|GO:0005578|GO:0030168|GO:0005576|GO:0006953|GO:0010951|GO:0007596|GO:0002576|GO:0046687	94844850	chr14	94844791	-	hs|14q32.13	NM_001002236	chr14:94844850-94844791	NM_001002236	Hs.525557
A_33_P3419134	-10.7031	-3.41996	10.7031	down	-0.810189	-1.37923	2.32525	2.32525	KIAA1598	KIAA1598	FALSE	Homo sapiens mRNA; cDNA DKFZp686A0439 (from clone DKFZp686A0439). [CR749417]	57698	GO:0007411|GO:2001222|GO:2000114|GO:0044295|GO:0019900	118615837	chr10	118615778	-	hs|10q25.3	CR749417	chr10:118615837-118615778		Hs.501140
A_33_P3244013	-10.8574	-3.4406	10.8574	down	-0.645339	-0.620811	2.80753	2.80753	NEBL	nebulette	FALSE	Homo sapiens nebulette (NEBL), transcript variant 1, mRNA [NM_006393]	10529	GO:0008092|GO:0005515|GO:0071691|GO:0030018|GO:0001725|GO:0051015|GO:0031005|GO:0008307|GO:0005523|GO:0070062|GO:0031674	21177092	chr10	21177033	-	hs|10p12.31	NM_006393	chr10:21177092-21177033	NM_006393	Hs.5025
A_33_P3260747	-15.5261	-3.95663	15.5261	down	-0.241319	-0.217921	3.72701	3.72701	NHSL2	NHS-like 2	FALSE	NHS-like 2 [Source:HGNC Symbol;Acc:HGNC:33737] [ENST00000373677]	340527		71361212	chrX	71361153	+	hs|Xq13.1	BC033261	chrX:71361153-71361212		Hs.397836
A_21_P0014723	-5.79938	-2.5359	5.79938	down	-0.134681	-0.216035	2.36054	2.36054			FALSE	AF272899 PR-domain zinc finger protein 6 isoform B {Homo sapiens} (exp=-1; wgp=0; cg=0), partial (11%) [THC2618554]			122422970	chr5	122422911	-	hs|5q23.2		chr5:122422970-122422911
A_21_P0004155	-3.86369	-1.94998	3.86369	down	-1.2769	-1.25498	0.68404	0.68404			FALSE				92011799	chr5	92011740	-	hs|5q14.3		chr5:92011799-92011740
A_23_P302568	-3.51238	-1.81245	3.51238	down	-0.184293	0.184293	1.81245	1.81245	SLC30A3	solute carrier family 30 (zinc transporter), member 3	FALSE	Homo sapiens solute carrier family 30 (zinc transporter), member 3 (SLC30A3), mRNA [NM_003459]	7781	GO:0071577|GO:0043005|GO:0030054|GO:0061088|GO:0005770|GO:0015633|GO:0055085|GO:0008021|GO:0005737|GO:0016020|GO:0005887|GO:0006810|GO:0030672|GO:0051050|GO:0005768	27477607	chr2	27477548	-	hs|2p23.3	NM_003459	chr2:27477607-27477548	NM_003459	Hs.467981
A_21_P0004298	-3.4216	-1.77467	3.4216	down	-0.521184	-0.397377	1.31539	1.31539	lnc-TCF7-3	lnc-TCF7-3:2	FALSE	LNCipedia lincRNA (lnc-TCF7-3), lincRNA [lnc-TCF7-3:2]			133135915	chr5	133135856	+	hs|5q31.1		chr5:133135856-133135915
A_23_P56659	-8.07716	-3.01385	8.07716	down	-1.88845	-1.66967	1.23479	1.23479	DQX1	DEAQ box RNA-dependent ATPase 1	FALSE	Homo sapiens DEAQ box RNA-dependent ATPase 1 (DQX1), mRNA [NM_133637]	165545	GO:0004004|GO:0005737|GO:0000398|GO:0005681|GO:0005524	74745410	chr2	74745351	-	hs|2p13.1	NM_133637	chr2:74745410-74745351	NM_133637	Hs.191705
A_21_P0008285	-13.2426	-3.72711	13.2426	down	0.0468042	-0.540134	3.48045	3.48045	lnc-RPGRIP1-2	lnc-RPGRIP1-2:1	FALSE	LNCipedia lincRNA (lnc-RPGRIP1-2), lincRNA [lnc-RPGRIP1-2:1]			21672509	chr14	21672450	+	hs|14q11.2		chr14:21672450-21672509
A_33_P3277373	-13.2295	-3.72568	13.2295	down	-0.875666	-0.852495	2.8616	2.8616	OSM	oncostatin M	FALSE	Homo sapiens oncostatin M (OSM), mRNA [NM_020530]	5008	GO:0042506|GO:0008284|GO:0008285|GO:0042503|GO:0009408|GO:0008283|GO:0042508|GO:2001235|GO:0050731|GO:0005615|GO:0046888|GO:0033138|GO:0006955|GO:0002675|GO:0045944|GO:0051781|GO:0005147|GO:0007275|GO:0005125|GO:0038165|GO:0007422|GO:0043410|GO:0008083|GO:0045835|GO:0048266|GO:0040008	30660206	chr22	30660147	-	hs|22q12.2	NM_020530	chr22:30660206-30660147	NM_020530	Hs.248156
A_32_P225345	-9.27452	-3.21327	9.27452	down	-0.199825	-0.215561	3.00558	3.00558	C11orf88	chromosome 11 open reading frame 88	FALSE	Homo sapiens chromosome 11 open reading frame 88 (C11orf88), transcript variant 1, mRNA [NM_207430]	399949		111407515	chr11	111405151	+	hs|11q23.1	NM_207430	chr11:111405151-111407515	NM_207430	Hs.411600
A_21_P0004301	-4.11329	-2.04029	4.11329	down	-1.12945	-1.10362	0.923755	0.923755	lnc-SLC25A48-2	lnc-SLC25A48-2:1	FALSE	PREDICTED: Homo sapiens uncharacterized LOC101930049 (LOC101930049), mRNA [XM_005276270]			135160117	chr5	135148582	+	hs|5q31.1		chr5:135148582-135160117	XM_005276270
A_21_P0000765	-12.5304	-3.64736	12.5304	down	-0.324669	-0.301719	3.33416	3.33416	LINC01541	long intergenic non-protein coding RNA 1541	FALSE	Homo sapiens long intergenic non-protein coding RNA 1541 (LINC01541), transcript variant 1, long non-coding RNA [NR_038325]	100505776		69187281	chr18	69187222	-	hs|18q22.3	NR_038325	chr18:69187281-69187222	NR_038325	Hs.202072
A_23_P54681	-7.64865	-2.9352	7.64865	down	-0.244606	-0.220269	2.70277	2.70277	TOX3	TOX high mobility group box family member 3	FALSE	Homo sapiens TOX high mobility group box family member 3 (TOX3), transcript variant 2, mRNA [NM_001146188]	27324	GO:0051219|GO:0034056|GO:0005515|GO:0043524|GO:0003682|GO:0006915|GO:0006338|GO:0005634|GO:0045893|GO:0042803|GO:0006351	52472865	chr16	52472806	-	hs|16q12.1	NM_001146188	chr16:52472865-52472806	NM_001146188	Hs.460789
A_24_P943949	-5.17621	-2.3719	5.17621	down	-0.241962	-0.218391	2.14172	2.14172	LRRC8B	leucine rich repeat containing 8 family, member B	FALSE	Homo sapiens leucine rich repeat containing 8 family, member B (LRRC8B), transcript variant 1, mRNA [NM_015350]	23507	GO:0005515|GO:0005886|GO:0016021|GO:0006811	90062857	chr1	90062798	+	hs|1p22.2	NM_015350	chr1:90062798-90062857	NM_015350	Hs.482017
A_21_P0011419	-4.56915	-2.19193	4.56915	down	-0.295406	-0.805565	1.64144	1.64144	PKD1	polycystic kidney disease 1 (autosomal dominant)	FALSE	Homo sapiens polycystic kidney disease 1 (autosomal dominant) (PKD1), transcript variant 2, mRNA [NM_000296]	5310	GO:0005515|GO:0006807|GO:0060674|GO:0072237|GO:0051216|GO:0034405|GO:0042994|GO:0009653|GO:0007507|GO:0016337|GO:0018105|GO:0050982|GO:0072177|GO:0006611|GO:0048806|GO:0070062|GO:0005262|GO:0006996|GO:0019901|GO:0060236|GO:0019904|GO:0001892|GO:0072372|GO:0002133|GO:0072205|GO:0001701|GO:0044325|GO:0001889|GO:0072287|GO:0005929|GO:0001502|GO:0005887|GO:0070588|GO:0043588|GO:0060170|GO:0060428|GO:…	2162948	chr16	2162889	-	hs|16p13.3	NM_000296	chr16:2162948-2162889	NM_000296	Hs.75813
A_33_P3289596	-4.32516	-2.11275	4.32516	down	-0.235857	-0.217233	1.88621	1.88621	EFR3B	EFR3 homolog B (S. cerevisiae)	FALSE	Homo sapiens EFR3 homolog B (S. cerevisiae) (EFR3B), mRNA [NM_014971]	22979		25378243	chr2	25378184	+	hs|2p23.3	NM_014971	chr2:25378184-25378243	NM_014971	Hs.4892
A_33_P3406843	-7.90194	-2.98221	7.90194	down	-0.238291	-0.0426297	2.84175	2.84175	LOC442132	golgin A6 family-like 1 pseudogene	FALSE	Homo sapiens golgin A6 family-like 1 pseudogene (LOC442132), non-coding RNA [NR_033906]	442132		7299924	chr5	7299866	-	hs|5p15.31	NR_033906	chr5:7299924-7299866	NR_033906	Hs.727388
A_33_P3266025	-2.07953	-1.05626	2.07953	down	0.0823267	-0.0823267	1.05626	1.05626			FALSE	cytochrome c oxidase subunit Vb pseudogene 2 [Source:HGNC Symbol;Acc:HGNC:2271] [ENST00000576956]			136355391	chr6	136355332	-	hs|6q23.3		chr6:136355391-136355332
A_23_P409438	-3.01667	-1.59296	3.01667	down	-0.8734	-0.982293	0.665112	0.665112	IFNL2	interferon, lambda 2	FALSE	Homo sapiens interferon, lambda 2 (IFNL2), mRNA [NM_172138]	282616	GO:0051607|GO:0002385|GO:0050778|GO:0007259|GO:0005615|GO:0005125	39760694	chr19	39760635	+	hs|19q13.2	NM_172138	chr19:39760635-39760694	NM_172138	Hs.567792
A_21_P0007684	-8.31961	-3.05652	8.31961	down	-1.3444	-0.664357	2.05214	2.05214	lnc-VWF-2	lnc-VWF-2:1	FALSE	LNCipedia lincRNA (lnc-VWF-2), lincRNA [lnc-VWF-2:1]			6289832	chr12	6289773	-	hs|12p13.31		chr12:6289832-6289773
A_21_P0007267	-8.26121	-3.04635	8.26121	down	-0.241408	-0.218363	2.81647	2.81647	lnc-CEP57-1	lnc-CEP57-1:2	FALSE	LNCipedia lincRNA (lnc-CEP57-1), lincRNA [lnc-CEP57-1:2]			95432634	chr11	95432575	+	hs|11q21		chr11:95432575-95432634
A_23_P32078	-6.93747	-2.79441	6.93747	down	-0.235673	-0.21741	2.56787	2.56787	SLC28A3	solute carrier family 28 (concentrative nucleoside transporter), member 3	FALSE	Homo sapiens solute carrier family 28 (concentrative nucleoside transporter), member 3 (SLC28A3), transcript variant 2, mRNA [NM_022127]	64078	GO:0015860|GO:0005886|GO:0005887|GO:0001882|GO:0015389|GO:0005789|GO:0015864|GO:0006863|GO:0015390|GO:0055085|GO:0072531|GO:0015855	86900385	chr9	86900326	-	hs|9q21.33	NM_022127	chr9:86900385-86900326	NM_022127	Hs.535966
A_23_P7144	-5.57766	-2.47966	5.57766	down	-0.354209	-0.295949	2.15458	2.15458	CXCL1	chemokine (C-X-C motif) ligand 1 (melanoma growth stimulating activity, alpha)	FALSE	Homo sapiens chemokine (C-X-C motif) ligand 1 (melanoma growth stimulating activity, alpha) (CXCL1), transcript variant 1, mRNA [NM_001511]	2919	GO:0008009|GO:0070098|GO:0030036|GO:0008285|GO:0008283|GO:0005102|GO:0005576|GO:0045236|GO:0043085|GO:0005615|GO:0002690|GO:0007399|GO:0035556|GO:0007165|GO:0006955|GO:0006954|GO:0006935|GO:0007186|GO:0060326|GO:0032496|GO:0008047|GO:0008083	74736909	chr4	74736850	+	hs|4q13.3	NM_001511	chr4:74736850-74736909	NM_001511	Hs.789
A_21_P0007208	-10.9937	-3.45861	10.9937	down	-0.259943	-0.235048	3.21111	3.21111	LOC100507384	uncharacterized LOC100507384	FALSE	Homo sapiens uncharacterized LOC100507384 (LOC100507384), long non-coding RNA [NR_047569]	100507384		45745749	chr11	45745101	+	hs|11p11.2	NR_047569	chr11:45745101-45745749	NR_047569	Hs.259426
A_33_P3223172	-7.18011	-2.84401	7.18011	down	-0.248644	-0.227385	2.60599	2.60599	LOC102724034	uncharacterized LOC102724034	FALSE	PREDICTED: Homo sapiens uncharacterized LOC102724079 (LOC102724079), transcript variant X1, ncRNA [XR_429583]	102724034		85045611	chr15	85045552	+	hs|15q25.2	XR_429583	chr15:85045552-85045611	XR_429583	Hs.578669
A_21_P0005583	-6.9359	-2.79408	6.9359	down	-0.241693	-0.21857	2.56395	2.56395	lnc-KRBA1-1	lnc-KRBA1-1:1	FALSE	LNCipedia lincRNA (lnc-KRBA1-1), lincRNA [lnc-KRBA1-1:1]			149294581	chr7	149253521	+	hs|7q36.1		chr7:149253521-149294581
A_21_P0008107	-4.25921	-2.09059	4.25921	down	-0.130939	-0.145322	1.95246	1.95246	LOC101927361	uncharacterized LOC101927361	FALSE	PREDICTED: Homo sapiens uncharacterized LOC101927361 (LOC101927361), ncRNA [XR_243058]	101927361		97799734	chr13	97799675	+	hs|13q32.1	XR_243058	chr13:97799675-97799734	XR_243058
A_21_P0004841	-6.62658	-2.72826	6.62658	down	-0.0968718	-0.286154	2.53675	2.53675	lnc-CD83-3	lnc-CD83-3:1	FALSE	LNCipedia lincRNA (lnc-CD83-3), lincRNA [lnc-CD83-3:1]			14509093	chr6	14498377	+	hs|6p23		chr6:14498377-14509093
A_21_P0004146	-6.52042	-2.70497	6.52042	down	-0.241981	-0.218811	2.47457	2.47457	lnc-ZBED3-1	lnc-ZBED3-1:1	FALSE	LNCipedia lincRNA (lnc-ZBED3-1), lincRNA [lnc-ZBED3-1:1]			76393347	chr5	76393288	-	hs|5q13.3		chr5:76393347-76393288
A_24_P261750	-5.02757	-2.32986	5.02757	down	-0.241611	-0.218687	2.09971	2.09971	KERA	keratocan	FALSE	Homo sapiens keratocan (KERA), mRNA [NM_007035]	11081	GO:0005796|GO:0005975|GO:0005578|GO:0005576|GO:0044281|GO:0042339|GO:0061303|GO:0003674|GO:0018146|GO:0009405|GO:0042340|GO:0007601|GO:0030203|GO:0050896|GO:0043202	91445203	chr12	91445144	-	hs|12q21.33	NM_007035	chr12:91445203-91445144	NM_007035	Hs.125750
A_23_P142096	-6.90198	-2.78701	6.90198	down	-0.396595	-0.497014	2.3402	2.3402	GPR32	G protein-coupled receptor 32	FALSE	Homo sapiens G protein-coupled receptor 32 (GPR32), mRNA [NM_001506]	2854	GO:0007186|GO:0005887|GO:0004930	51274723	chr19	51274664	+	hs|19q13.33	NM_001506	chr19:51274664-51274723	NM_001506	Hs.515555
A_21_P0012165	-3.92611	-1.9731	3.92611	down	-0.248682	-0.228007	1.73476	1.73476			FALSE	AGENCOURT_10580380 NIH_MGC_128 Homo sapiens cDNA clone IMAGE:6710146 5', mRNA sequence [BU940462]			46040112	chr20	46040053	-	hs|20q13.12		chr20:46040112-46040053		Hs.574796
A_21_P0007824	-8.47302	-3.08288	8.47302	down	-0.570034	-0.17299	2.71136	2.71136	lnc-CDKN1B-1	lnc-CDKN1B-1:1	FALSE	LNCipedia lincRNA (lnc-CDKN1B-1), lincRNA [lnc-CDKN1B-1:1]			12850829	chr12	12850770	+	hs|12p13.1		chr12:12850770-12850829
A_33_P3280875	-2.04519	-1.03224	2.04519	down	-0.683673	-0.447291	0.466756	0.466756	IVNS1ABP	influenza virus NS1A binding protein	FALSE	Homo sapiens influenza virus NS1A binding protein (IVNS1ABP), mRNA [NM_006469]	10625	GO:0008380|GO:0005667|GO:0005737|GO:0016032|GO:0005681|GO:0005654|GO:2001243|GO:0015629|GO:0009615|GO:0006383	185277992	chr1	185277933	-	hs|1q25.3	NM_006469	chr1:185277992-185277933	NM_006469	Hs.497183
A_24_P275073	-2.3592	-1.2383	2.3592	down	0.109596	-0.243083	1.17156	1.17156	ADAMTS14	ADAM metallopeptidase with thrombospondin type 1 motif, 14	FALSE	Homo sapiens ADAM metallopeptidase with thrombospondin type 1 motif, 14 (ADAMTS14), transcript variant 1, mRNA [NM_139155]	140766	GO:0030198|GO:0030199|GO:0030574|GO:0006508|GO:0005578|GO:0008270|GO:0005576|GO:0004222	72522191	chr10	72522132	+	hs|10q22.1	NM_139155	chr10:72522132-72522191	NM_139155	Hs.352156
A_23_P125809	-4.02144	-2.00771	4.02144	down	-0.138759	-0.215021	1.83082	1.83082	ZCCHC12	zinc finger, CCHC domain containing 12	FALSE	Homo sapiens zinc finger, CCHC domain containing 12 (ZCCHC12), mRNA [NM_173798]	170261	GO:0030374|GO:0016607|GO:0008270|GO:0030509|GO:0003676|GO:0006351	117960324	chrX	117960265	+	hs|Xq24	NM_173798	chrX:117960265-117960324	NM_173798	Hs.21417
A_23_P120899	-3.32871	-1.73496	3.32871	down	-0.214253	0.087965	1.67182	1.67182	CSF2RB	colony stimulating factor 2 receptor, beta, low-affinity (granulocyte-macrophage)	FALSE	Homo sapiens colony stimulating factor 2 receptor, beta, low-affinity (granulocyte-macrophage) (CSF2RB), mRNA [NM_000395]	1439	GO:0005515|GO:0038156|GO:0005886|GO:0007585|GO:0004912|GO:0038043|GO:0004914|GO:0036016|GO:0007165|GO:0030526|GO:0005887|GO:0032496|GO:0004872	37334657	chr22	37334598	+	hs|22q12.3	NM_000395	chr22:37334598-37334657	NM_000395	Hs.592192
A_23_P255695	-5.68507	-2.50718	5.68507	down	-0.255164	-0.231901	2.26364	2.26364	SLC17A3	solute carrier family 17 (organic anion transporter), member 3	FALSE	Homo sapiens solute carrier family 17 (organic anion transporter), member 3 (SLC17A3), transcript variant 2, mRNA [NM_006632]	10786	GO:0019534|GO:0048471|GO:0015562|GO:0005886|GO:0035435|GO:0015760|GO:0031526|GO:0046415|GO:0005737|GO:0016324|GO:0044070|GO:0034220|GO:0006855|GO:0015711|GO:0006817|GO:0008514|GO:0035725|GO:0006814|GO:0015893|GO:0008308|GO:0055085|GO:0015143|GO:0005436|GO:0005887|GO:0015747|GO:0005789|GO:0015849|GO:0015238	25849668	chr6	25849609	-	hs|6p22.2	NM_006632	chr6:25849668-25849609	NM_006632	Hs.327179
A_23_P357248	-4.00269	-2.00097	4.00269	down	-0.48951	0.162772	1.8376	1.8376	ZNF343	zinc finger protein 343	FALSE	Homo sapiens zinc finger protein 343 (ZNF343), transcript variant 1, mRNA [NM_024325]	79175	GO:0006355|GO:0005634|GO:0003677|GO:0046872|GO:0006351	2474457	chr20	2474198	-	hs|20p13	NM_024325	chr20:2474457-2474198	NM_024325	Hs.516846
A_19_P00328886	-4.51025	-2.17321	4.51025	down	-0.384317	-0.0725887	1.94476	1.94476	TUG1	taurine up-regulated 1 (non-protein coding)	FALSE	Homo sapiens taurine up-regulated 1 (non-protein coding) (TUG1), transcript variant 1, long non-coding RNA [NR_110492]	55000		31375336	chr22	31375277	+	hs|22q12.2	NR_110492	chr22:31375277-31375336	NR_110492	Hs.554829
A_33_P3276615	-6.54395	-2.71016	6.54395	down	-0.622064	-0.602414	2.09792	2.09792	APOL4	apolipoprotein L, 4	FALSE	Homo sapiens apolipoprotein L, 4 (APOL4), transcript variant a, mRNA [NM_030643]	80832	GO:0006629|GO:0003674|GO:0006869|GO:0042157|GO:0005575|GO:0005615|GO:0008289	36587182	chr22	36587123	-	hs|22q12.3	NM_030643	chr22:36587182-36587123	NM_030643	Hs.115099
A_21_P0000097	-8.2135	-3.038	8.2135	down	-0.215808	-0.0439429	2.90812	2.90812	PAFAH1B2	platelet-activating factor acetylhydrolase 1b, catalytic subunit 2 (30kDa)	FALSE	Homo sapiens platelet-activating factor acetylhydrolase 1b, catalytic subunit 2 (30kDa) (PAFAH1B2), transcript variant 2, mRNA [NM_001184746]	5049	GO:0006629|GO:0005886|GO:0046982|GO:0047179|GO:0005730|GO:0003847|GO:0007283|GO:0042803|GO:0005829|GO:0016042|GO:0005737|GO:0007420|GO:0070062|GO:0016239	117046854	chr11	117046795	+	hs|11q23.3	NM_001184746	chr11:117046795-117046854	NM_001184746	Hs.728488
A_21_P0010727	-4.46759	-2.1595	4.46759	down	-0.290415	-0.268151	1.88021	1.88021	FCGR1A	Fc fragment of IgG, high affinity Ia, receptor (CD64)	FALSE	Fc fragment of IgG, high affinity Ia, receptor (CD64) [Source:HGNC Symbol;Acc:HGNC:3613] [ENST00000489479]	2209	GO:0005515|GO:0002474|GO:0005886|GO:0019221|GO:0042590|GO:0006911|GO:0035556|GO:0007165|GO:0006955|GO:0019864|GO:0045087|GO:0031901|GO:0002479|GO:0005057|GO:0016021|GO:0038096|GO:0030669|GO:0060333	149755228	chr1	149755169	+	hs|1q21.2		chr1:149755169-149755228		Hs.534956
A_21_P0000647	-14.4291	-3.85091	14.4291	down	-0.236452	-0.21859	3.62339	3.62339	LGALS17A	Charcot-Leyden crystal protein pseudogene	FALSE	Homo sapiens Charcot-Leyden crystal protein pseudogene (LGALS17A), non-coding RNA [NR_034156]	400696		40177010	chr19	40176951	+	hs|19q13.2	NR_034156	chr19:40176951-40177010	NR_034156	Hs.456377
A_33_P3265419	-4.92615	-2.30046	4.92615	down	-1.17515	-1.15738	1.1342	1.1342			FALSE				89525898	chr16	89525839	+	hs|16q24.3		chr16:089525839-089525898
A_33_P3224702	-4.60478	-2.20313	4.60478	down	-0.250775	-0.231406	1.96204	1.96204	PCNXL4	pecanex-like 4 (Drosophila)	FALSE	Homo sapiens chromosome 14 open reading frame 135, mRNA (cDNA clone IMAGE:3685861). [BC030714]	64430	GO:0016021	60575497	chr14	60575438	+	hs|14q23.1	BC030714	chr14:60575438-60575497		Hs.509499
A_21_P0008556	-10.5956	-3.40539	10.5956	down	-0.235945	-0.218567	3.17813	3.17813	LOC101928850	uncharacterized LOC101928850	FALSE	PREDICTED: Homo sapiens uncharacterized LOC101928850 (LOC101928850), ncRNA [XR_253389]	101928850		61897386	chr15	61897327	+	hs|15q22.2	XR_253389	chr15:61897327-61897386	XR_253389	Hs.321359
A_33_P3227077	-6.31281	-2.65828	6.31281	down	-0.905985	-1.66803	1.37127	1.37127			FALSE	Homo sapiens mRNA for FLJ00287 protein. [AK090403]			30814556	chr15	30814497	-	hs|15q13.2	AK090403	chr15:30814556-30814497
A_21_P0005054	-12.7014	-3.66692	12.7014	down	-0.581665	-0.564062	3.09405	3.09405	lnc-ZUFSP-1	lnc-ZUFSP-1:1	FALSE	LNCipedia lincRNA (lnc-ZUFSP-1), lincRNA [lnc-ZUFSP-1:1]			116918096	chr6	116918037	-	hs|6q22.1		chr6:116918096-116918037
A_21_P0012473	-3.27911	-1.7133	3.27911	down	-0.391588	-0.471486	1.28177	1.28177	VEZF1	vascular endothelial zinc finger 1	FALSE	Homo sapiens vascular endothelial zinc finger 1 (VEZF1), mRNA [NM_007146]	7716	GO:0006968|GO:0005737|GO:0006366|GO:0006357|GO:0001885|GO:0005654|GO:0005634|GO:0001525|GO:0003677|GO:0046872	56052093	chr17	56052034	-	hs|17q22	NM_007146	chr17:56052093-56052034	NM_007146	Hs.463569
A_21_P0004831	-5.14071	-2.36197	5.14071	down	-0.236102	-0.218542	2.13465	2.13465	LOC102724234	uncharacterized LOC102724234	FALSE	PREDICTED: Homo sapiens uncharacterized LOC102724234 (LOC102724234), transcript variant X1, ncRNA [XR_425966]	102724234		7430368	chr6	7430309	+	hs|6p24.3	XR_425966	chr6:7430309-7430368	XR_425966
A_23_P51311	-4.11805	-2.04196	4.11805	down	-0.493603	-0.362534	1.61389	1.61389	LELP1	late cornified envelope-like proline-rich 1	FALSE	Homo sapiens late cornified envelope-like proline-rich 1 (LELP1), mRNA [NM_001010857]	149018		153177282	chr1	153177223	+	hs|1q21.3	NM_001010857	chr1:153177223-153177282	NM_001010857	Hs.125785
A_33_P3246063	-17.3259	-4.11486	17.3259	down	-0.248197	-0.229947	3.87579	3.87579			FALSE				5793932	chr18	5793873	+	hs|18p11.31		chr18:005793873-005793932
A_21_P0014641	-5.43546	-2.4424	5.43546	down	-0.247856	-0.230002	2.20347	2.20347	LOC101929315	uncharacterized LOC101929315	FALSE	PREDICTED: Homo sapiens uncharacterized LOC101929315 (RP11-561E1.1), transcript variant X3, ncRNA [XR_426291]	101929315		24369197	chr8	24369138	-	hs|8p21.2	XR_426291	chr8:24369197-24369138	XR_426291
A_21_P0006866	-5.277	-2.39972	5.277	down	-0.245431	-0.225646	2.16418	2.16418	lnc-C10orf136-1	lnc-C10orf136-1:8	FALSE	LNCipedia lincRNA (lnc-C10orf136-1), lincRNA [lnc-C10orf136-1:8]			44409857	chr10	44409798	+	hs|10q11.21		chr10:44409798-44409857		Hs.178244
A_33_P3253538	-4.67855	-2.22606	4.67855	down	-1.72823	-1.70683	0.508533	0.508533	LRRC14B	leucine rich repeat containing 14B	FALSE	Homo sapiens leucine rich repeat containing 14B (LRRC14B), mRNA [NM_001080478]	389257		195468	chr5	195409	+	hs|5p15.33	NM_001080478	chr5:195409-195468	NM_001080478	Hs.683662
A_21_P0002818	-3.17341	-1.66604	3.17341	down	-0.689133	-1.14101	0.750964	0.750964	lnc-EIF4A2-1	lnc-EIF4A2-1:1	FALSE	DB302275 BRAMY2 Homo sapiens cDNA clone BRAMY2024252 3', mRNA sequence [DB302275]			186535769	chr3	186535710	+	hs|3q27.3		chr3:186535710-186535769		Hs.581155
A_21_P0002705	-10.1041	-3.33687	10.1041	down	-0.524887	-0.407086	2.87088	2.87088	LINC00901	long intergenic non-protein coding RNA 901	FALSE	Homo sapiens long intergenic non-protein coding RNA 901 (LINC00901), long non-coding RNA [NR_121607]	100506724		116651082	chr3	116651023	+	hs|3q13.31	NR_121607	chr3:116651023-116651082	NR_121607	Hs.125983
A_21_P0001294	-3.96841	-1.98856	3.96841	down	-0.240921	-0.219513	1.75835	1.75835	lnc-ELAVL4-2	lnc-ELAVL4-2:1	FALSE	LNCipedia lincRNA (lnc-ELAVL4-2), lincRNA [lnc-ELAVL4-2:1]			50773048	chr1	50772989	+	hs|1p32.3		chr1:50772989-50773048
A_21_P0004822	-24.7072	-4.62686	24.7072	down	-0.248113	-0.230058	4.38777	4.38777			FALSE	GMDS antisense RNA 1 (head to head) [Source:HGNC Symbol;Acc:HGNC:48993] [ENST00000607519]			2481135	chr6	2481076	+	hs|6p25.2		chr6:2481076-2481135		Hs.188825
A_21_P0002124	-6.047	-2.59622	6.047	down	-0.247857	-0.229976	2.3573	2.3573			FALSE				177710863	chr2	177710804	-	hs|2q31.1		chr2:177710863-177710804
A_33_P3323544	-9.90649	-3.30837	9.90649	down	-0.458225	-0.255157	2.95168	2.95168			FALSE				28615245	chr8	28615186	-	hs|8p21.1		chr8:028615245-028615186
A_33_P3396349	-2.47575	-1.30787	2.47575	down	-0.168891	0.0928903	1.26987	1.26987	lnc-C8orf56-1	lnc-C8orf56-1:3	FALSE	Homo sapiens cDNA FLJ43745 fis, clone TESTI2019648. [AK125733]			104258624	chr8	104258565	-	hs|8q22.3	AK125733	chr8:104258624-104258565		Hs.733366
A_24_P23625	-2.02614	-1.01873	2.02614	down	-0.656073	-0.667116	0.35714	0.35714	HS3ST3B1	heparan sulfate (glucosamine) 3-O-sulfotransferase 3B1	FALSE	Homo sapiens heparan sulfate (glucosamine) 3-O-sulfotransferase 3B1 (HS3ST3B1), transcript variant 1, mRNA [NM_006041]	9953	GO:0000139|GO:0005975|GO:0005887|GO:0033872|GO:0009405|GO:0044281|GO:0015012|GO:0008467|GO:0030203|GO:0015015|GO:0006024	14252186	chr17	14252127	+	hs|17p12	NM_006041	chr17:14252127-14252186	NM_006041	Hs.48384
A_33_P3403204	-4.50074	-2.17016	4.50074	down	-0.240917	-0.219952	1.93973	1.93973	CRB2	crumbs family member 2	FALSE	crumbs family member 2 [Source:HGNC Symbol;Acc:HGNC:18688] [ENST00000359999]	286204	GO:0001707|GO:0005886|GO:0001756|GO:0005509|GO:0010718|GO:0045199|GO:0014028|GO:0010951|GO:0019828|GO:0030513|GO:0043234|GO:0045121|GO:0016021|GO:0072358|GO:0019899|GO:0070062	126136362	chr9	126136303	+	hs|9q33.3	AK123000	chr9:126136303-126136362		Hs.710092
A_21_P0007023	-6.50152	-2.70078	6.50152	down	-0.132935	-0.111576	2.57852	2.57852	lnc-RAB11FIP2-2	lnc-RAB11FIP2-2:3	FALSE	LNCipedia lincRNA (lnc-RAB11FIP2-2), lincRNA [lnc-RAB11FIP2-2:3]			119587953	chr10	119587894	-	hs|10q26.11		chr10:119587953-119587894
A_19_P00317647	-2.22801	-1.15576	2.22801	down	0.0439262	0.190835	1.27314	1.27314	LINC01278	long intergenic non-protein coding RNA 1278	FALSE	Homo sapiens long intergenic non-protein coding RNA 1278 (LINC01278), long non-coding RNA [NR_015353]	92249		62780842	chrX	62780783	-	hs|Xq11.1	NR_015353	chrX:62780842-62780783	NR_015353	Hs.31532
A_23_P45579	-3.79083	-1.92252	3.79083	down	-0.247448	-0.230258	1.68366	1.68366	HSFY2	heat shock transcription factor, Y linked 2	FALSE	Homo sapiens heat shock transcription factor, Y linked 2 (HSFY2), transcript variant 1, mRNA [NM_153716]	159119	GO:0043565|GO:0006355|GO:0005737|GO:0003700|GO:0005634|GO:0006351	20710251	chrY	20710192	+	hs|Yq11.222	NM_153716	chrY:20710192-20710251	NM_153716	Hs.592255
A_21_P0008117	-3.94754	-1.98095	3.94754	down	-0.256141	-0.235121	1.73532	1.73532	lnc-COL4A2-2	lnc-COL4A2-2:1	FALSE	LNCipedia lincRNA (lnc-COL4A2-2), lincRNA [lnc-COL4A2-2:1]			110678579	chr13	110678520	+	hs|13q34		chr13:110678520-110678579
A_33_P3373795	-3.64472	-1.86581	3.64472	down	-0.285604	0.101624	1.77382	1.77382			FALSE				52916496	chr12	52916437	+	hs|12q13.13		chr12:052916437-052916496
A_23_P152262	-14.9208	-3.89925	14.9208	down	-0.132395	-0.111958	3.77708	3.77708	DPEP1	dipeptidase 1 (renal)	FALSE	Homo sapiens dipeptidase 1 (renal) (DPEP1), transcript variant 1, mRNA [NM_004413]	1800	GO:0005515|GO:0019369|GO:0006805|GO:0030054|GO:0034235|GO:0071732|GO:0005886|GO:0006749|GO:0031528|GO:0005634|GO:0031225|GO:0044281|GO:0006691|GO:0005615|GO:0050667|GO:0072341|GO:0072340|GO:0016324|GO:0070573|GO:0071277|GO:0006508|GO:0043154|GO:0043027|GO:0070062|GO:0030336|GO:0043066|GO:0045177|GO:0035690|GO:0016999|GO:0008235|GO:0008270|GO:0008239	89703953	chr16	89703894	+	hs|16q24.3	NM_004413	chr16:89703894-89703953	NM_004413	Hs.109
A_24_P129341	-2.48908	-1.31561	2.48908	down	-0.661078	-0.993301	0.488424	0.488424	AKR1B10	aldo-keto reductase family 1, member B10 (aldose reductase)	FALSE	Homo sapiens aldo-keto reductase family 1, member B10 (aldose reductase) (AKR1B10), mRNA [NM_020299]	57016	GO:0005515|GO:0044598|GO:0047718|GO:0045550|GO:0044597|GO:0001758|GO:0007603|GO:0007586|GO:0006081|GO:0001523|GO:0005764|GO:0005829|GO:0004033|GO:0016488|GO:0008202|GO:0070062|GO:0055114	134225858	chr7	134225799	+	hs|7q33	NM_020299	chr7:134225799-134225858	NM_020299	Hs.116724
A_33_P3342300	-4.42299	-2.14502	4.42299	down	-1.17685	-1.26911	0.922041	0.922041	VSX1	visual system homeobox 1	FALSE	Homo sapiens visual system homeobox 1 (VSX1), transcript variant 4, mRNA [NM_001256272]	30813	GO:0043565|GO:0006355|GO:0003700|GO:0060040|GO:0042551|GO:0005634|GO:0005575|GO:0007601|GO:0050896|GO:0006351	25052185	chr20	25052126	-	hs|20p11.21	NM_001256272	chr20:25052185-25052126	NM_001256272	Hs.274264
A_23_P361448	-2.35246	-1.23417	2.35246	down	-0.456847	-0.315132	0.848182	0.848182	SESN3	sestrin 3	FALSE	Homo sapiens sestrin 3 (SESN3), transcript variant 1, mRNA [NM_144665]	143686	GO:0032868|GO:0005634|GO:0042593|GO:0051896	94917647	chr11	94917588	-	hs|11q21	NM_144665	chr11:94917647-94917588	NM_144665	Hs.120633
A_23_P259955	-2.32481	-1.21711	2.32481	down	-0.160576	0.160576	1.21711	1.21711	GDF5	growth differentiation factor 5	FALSE	Homo sapiens growth differentiation factor 5 (GDF5), mRNA [NM_000557]	8200	GO:0005515|GO:0035137|GO:0035136|GO:0005886|GO:0050680|GO:0007267|GO:0030326|GO:0060395|GO:0005615|GO:0042802|GO:0043524|GO:0030198|GO:0002062|GO:0040014|GO:0043408|GO:0007179|GO:0032332|GO:0048468|GO:0010862|GO:0005576|GO:0042981|GO:0030509|GO:0005160|GO:0005125|GO:0045666|GO:0008083|GO:0040007|GO:2001054	34022206	chr20	34022147	-	hs|20q11.22	NM_000557	chr20:34022206-34022147	NM_000557	Hs.1573
A_33_P3216277	-3.87754	-1.95514	3.87754	down	-0.126748	-0.550651	1.61644	1.61644	LOC101059976	arf-GAP with GTPase, ANK repeat and PH domain-containing protein 2-like	FALSE	PREDICTED: Homo sapiens arf-GAP with GTPase, ANK repeat and PH domain-containing protein 2-like (LOC101059976), mRNA [XM_003959913]	101059976		205784347	chr1	205784288	+	hs|1q32.1	XM_003959913	chr1:205784288-205784347	XM_003959913	Hs.712115
A_21_P0002655	-2.15048	-1.10466	2.15048	down	-1.05145	-0.995841	0.0810151	0.0810151	LOC100505774	uncharacterized LOC100505774	FALSE	PREDICTED: Homo sapiens uncharacterized LOC100505774 (LOC100505774), ncRNA [XR_109967]	100505774		28931974	chr2	28931916	-	hs|2p23.2	XR_109967	chr2:28931974-28931916	XR_109967	Hs.741561
A_21_P0001933	-4.60284	-2.20253	4.60284	down	-0.243343	-0.223471	1.96912	1.96912			FALSE	603047960F1 NIH_MGC_116 Homo sapiens cDNA clone IMAGE:5188262 5', mRNA sequence [BI762903]			166666436	chr2	166666377	+	hs|2q24.3		chr2:166666377-166666436		Hs.616944
A_24_P162287	-2.08932	-1.06303	2.08932	down	-0.128119	0.240604	1.11928	1.11928	CEP250	centrosomal protein 250kDa	FALSE	Homo sapiens centrosomal protein 250kDa (CEP250), mRNA [NM_007186]	11190	GO:0005515|GO:0048471|GO:0005813|GO:0010457|GO:0006996|GO:0033365|GO:0005815|GO:0019901|GO:0005814|GO:0019904|GO:0008022|GO:0005829|GO:0043234|GO:0005929|GO:0030997|GO:0008104|GO:0000086|GO:0031616|GO:0000278|GO:0070062	34055176	chr20	34054886	+	hs|20q11.22	NM_007186	chr20:34054886-34055176	NM_007186	Hs.443976
A_33_P3356935	-9.97856	-3.31883	9.97856	down	-0.24258	-0.223623	3.08573	3.08573	COLCA1	colorectal cancer associated 1	FALSE	Homo sapiens colorectal cancer associated 1 (COLCA1), transcript variant 3, mRNA [NM_207429]	399948	GO:0016020|GO:0016021	111164321	chr11	111164262	-	hs|11q23.1	NM_207429	chr11:111164321-111164262	NM_207429	Hs.729225
A_33_P3394584	-12.8613	-3.68496	12.8613	down	-0.239642	-0.220716	3.45478	3.45478	FLJ16779	uncharacterized LOC100192386	FALSE	Homo sapiens uncharacterized LOC100192386 (FLJ16779), long non-coding RNA [NR_024389]	100192386		61892899	chr20	61892840	+	hs|20q13.33	NR_024389	chr20:61892840-61892899	NR_024389	Hs.111539
A_21_P0012175	-4.77299	-2.25489	4.77299	down	-0.768417	-0.750616	1.49538	1.49538	XLOC_l2_009050		FALSE	BROAD Institute lincRNA (XLOC_l2_009050), lincRNA [TCONS_l2_00017027]			35697631	chr21	35697572	+	hs|21q22.11		chr21:35697572-35697631
A_21_P0006701	-8.27756	-3.04921	8.27756	down	-0.174277	-0.157451	2.88334	2.88334			FALSE				107948333	chr10	107946745	+	hs|10q25.1		chr10:107946745-107948333
A_23_P327156	-2.04626	-1.03299	2.04626	down	-0.875	-1.04095	0.0750151	0.0750151	FUT8-AS1	FUT8 antisense RNA 1	FALSE	Homo sapiens FUT8 antisense RNA 1 (FUT8-AS1), long non-coding RNA [NR_024334]	645431		65878097	chr14	65878038	-	hs|14q23.3	NR_024334	chr14:65878097-65878038	NR_024334	Hs.713717
A_23_P94319	-17.1088	-4.09667	17.1088	down	-0.242449	-0.223714	3.86359	3.86359	KBTBD11	kelch repeat and BTB (POZ) domain containing 11	FALSE	Homo sapiens kelch repeat and BTB (POZ) domain containing 11 (KBTBD11), mRNA [NM_014867]	9920		1955093	chr8	1955034	+	hs|8p23.3	NM_014867	chr8:1955034-1955093	NM_014867	Hs.5333
A_21_P0005993	-5.91252	-2.56377	5.91252	down	-0.283796	-0.266123	2.28881	2.28881			FALSE				45212247	chr9	45212188	+	hs|9p11.2		chr9:45212188-45212247		Hs.557443
A_23_P332260	-4.74865	-2.24752	4.74865	down	-0.650626	-1.22321	1.3106	1.3106	PBOV1	prostate and breast cancer overexpressed 1	FALSE	Homo sapiens prostate and breast cancer overexpressed 1 (PBOV1), mRNA [NM_021635]	59351	GO:0005737|GO:0005634	138537141	chr6	138537123	-	hs|6q23.3	NM_021635	chr6:138537141-138537123	NM_021635	Hs.302016
A_21_P0014012	-3.36867	-1.75218	3.36867	down	0.017324	-0.403087	1.5593	1.5593	PYCARD-AS1	PYCARD antisense RNA 1	FALSE	Homo sapiens PYCARD antisense RNA 1 (PYCARD-AS1), long non-coding RNA [NR_102400]	100652740		31214714	chr16	31214655	+	hs|16p11.2	NR_102400	chr16:31214655-31214714	NR_102400
A_19_P00316933	-14.2494	-3.83283	14.2494	down	-0.239167	-0.220889	3.6028	3.6028			FALSE				58063263	chr8	58063204	+	hs|8q12.1		chr8:58063204-58063263
A_33_P3383486	-5.1058	-2.35214	5.1058	down	-0.238893	-0.220904	2.12224	2.12224			FALSE				99598773	chr7	99598714	+	hs|7q22.1		chr7:099598714-099598773
A_21_P0012467	-5.10762	-2.35265	5.10762	down	-0.0810118	-0.13001	2.24714	2.24714	LINC01192	long intergenic non-protein coding RNA 1192	FALSE	Homo sapiens long intergenic non-protein coding RNA 1192 (LINC01192), long non-coding RNA [NR_033945]	647107		162895746	chr3	162895689	-	hs|3q26.1	NR_033945	chr3:162895746-162895689	NR_033945	Hs.408584
A_33_P3400253	-5.45395	-2.4473	5.45395	down	-0.165492	-0.149557	2.28978	2.28978	ACSM6	acyl-CoA synthetase medium-chain family member 6	FALSE	acyl-CoA synthetase medium-chain family member 6 [Source:HGNC Symbol;Acc:HGNC:31665] [ENST00000327739]	142827	GO:0005739|GO:0006631|GO:0005525|GO:0005524|GO:0047760|GO:0046872	96985986	chr10	96985927	+	hs|10q23.33	AK126134	chr10:96985927-96985986		Hs.134229
A_21_P0004636	-2.39374	-1.25926	2.39374	down	-0.692936	-0.362963	0.731314	0.731314	LOC101928406	uncharacterized LOC101928406	FALSE	PREDICTED: Homo sapiens uncharacterized LOC101928406 (LOC101928406), ncRNA [XR_241981]	101928406		15999965	chr6	15999906	+	hs|6p22.3	XR_241981	chr6:15999906-15999965	XR_241981	Hs.434413
A_23_P28507	-7.21334	-2.85067	7.21334	down	-0.238809	-0.221091	2.62072	2.62072	MGAT4A	mannosyl (alpha-1,3-)-glycoprotein beta-1,4-N-acetylglucosaminyltransferase, isozyme A	FALSE	Homo sapiens mannosyl (alpha-1,3-)-glycoprotein beta-1,4-N-acetylglucosaminyltransferase, isozyme A (MGAT4A), transcript variant 1, mRNA [NM_012214]	11320	GO:0000139|GO:0006491|GO:0016021|GO:0044267|GO:0046872|GO:0070062|GO:0043687|GO:0018279|GO:0008454	99242256	chr2	99242197	-	hs|2q11.2	NM_012214	chr2:99242256-99242197	NM_012214	Hs.177576
A_23_P329112	-10.3283	-3.36853	10.3283	down	-1.0553	-0.679886	2.50094	2.50094	JAK3	Janus kinase 3	FALSE	Homo sapiens Janus kinase 3 (JAK3), mRNA [NM_000215]	3718	GO:0005515|GO:0007260|GO:0070232|GO:0032693|GO:0007262|GO:0060397|GO:0051427|GO:0005829|GO:0002731|GO:0035556|GO:0006954|GO:0045944|GO:0042102|GO:0030183|GO:0070670|GO:0070672|GO:2001241|GO:0035771|GO:0043029|GO:0005856|GO:0038083|GO:0071104|GO:0050868|GO:0019903|GO:0070244|GO:0042981|GO:0018108|GO:0005524|GO:0012505|GO:0031234|GO:0016477|GO:0045221|GO:0032695|GO:0045087|GO:0030218|GO:0045626|GO:…	17937339	chr19	17937280	-	hs|19p13.11	NM_000215	chr19:17937339-17937280	NM_000215	Hs.515247
A_23_P343826	-2.00792	-1.0057	2.00792	down	-0.0633411	0.170492	1.05927	1.05927	FCHSD1	FCH and double SH3 domains 1	FALSE	Homo sapiens FCH and double SH3 domains 1 (FCHSD1), mRNA [NM_033449]	89848		141019875	chr5	141019816	-	hs|5q31.3	NM_033449	chr5:141019875-141019816	NM_033449	Hs.591257
A_33_P3382766	-21.2774	-4.41125	21.2774	down	-0.251781	-0.234869	4.16793	4.16793	FAM27B	family with sequence similarity 27, member B	FALSE	Homo sapiens cDNA FLJ36039 fis, clone TESTI2017311. [AK093358]	100133121		67793382	chr9	67793323	+	hs|9q13	AK093358	chr9:67793323-67793382		Hs.744835
A_24_P140569	-9.24555	-3.20876	9.24555	down	-1.0424	-1.02561	2.17475	2.17475	LRRTM2	leucine rich repeat transmembrane neuronal 2	FALSE	Homo sapiens leucine rich repeat transmembrane neuronal 2 (LRRTM2), mRNA [NM_015564]	26045	GO:0030054|GO:0050808|GO:0045211|GO:0060291|GO:0016021|GO:0060076|GO:0042043|GO:0002091	138205628	chr5	138205569	-	hs|5q31.2	NM_015564	chr5:138205628-138205569	NM_015564	Hs.656653
A_21_P0008592	-11.5549	-3.53043	11.5549	down	-0.0772047	0.0772052	3.53043	3.53043	lnc-C15orf2-6	lnc-C15orf2-6:2	FALSE	LNCipedia lincRNA (lnc-C15orf2-6), lincRNA [lnc-C15orf2-6:2]			24610373	chr15	24608740	+	hs|15q11.2		chr15:24608740-24610373
A_32_P21246	-4.97841	-2.31569	4.97841	down	-0.251223	-0.234974	2.07259	2.07259	HCG27	HLA complex group 27 (non-protein coding)	FALSE	Homo sapiens HLA complex group 27 (non-protein coding) (HCG27), long non-coding RNA [NR_026791]	253018		31171154	chr6	31171095	+	hs|6p21.33	NR_026791	chr6:31171095-31171154	NR_026791	Hs.659818
A_33_P3338382	-4.48075	-2.16374	4.48075	down	-0.240606	-0.222847	1.93201	1.93201	OR1K1	olfactory receptor, family 1, subfamily K, member 1	FALSE	Homo sapiens olfactory receptor, family 1, subfamily K, member 1 (OR1K1), mRNA [NM_080859]	392392	GO:0050911|GO:0050907|GO:0004984|GO:0007186|GO:0005886|GO:0004930|GO:0016021|GO:0004888	125563212	chr9	125563153	+	hs|9q33.2	NM_080859	chr9:125563153-125563212	NM_080859	Hs.632681
A_21_P0003944	-4.46747	-2.15946	4.46747	down	-0.244076	-0.232766	1.92104	1.92104	lnc-EXOC3-2	lnc-EXOC3-2:1	FALSE	LNCipedia lincRNA (lnc-EXOC3-2), lincRNA [lnc-EXOC3-2:1]			526709	chr5	526650	+	hs|5p15.33		chr5:526650-526709
A_33_P3233560	-4.26612	-2.09292	4.26612	down	-0.0738812	-0.698965	1.7065	1.7065	UROS	uroporphyrinogen III synthase	FALSE	uroporphyrinogen III synthase [Source:HGNC Symbol;Acc:HGNC:12592] [ENST00000368774]	7390	GO:0071418|GO:0005739|GO:0048037|GO:0006780|GO:0006778|GO:0044281|GO:0006782|GO:0004852|GO:0071243|GO:0046677|GO:0006783|GO:0005829	127495780	chr10	127495721	-	hs|10q26.13		chr10:127495780-127495721
A_33_P3247057	-2.00409	-1.00295	2.00409	down	-0.432581	-0.708153	0.432581	0.432581	SMIM5	small integral membrane protein 5	FALSE	Homo sapiens small integral membrane protein 5 (SMIM5), transcript variant 1, mRNA [NM_001162995]	643008	GO:0016021	73637484	chr17	73637425	+	hs|17q25.1	NM_001162995	chr17:73637425-73637484	NM_001162995	Hs.528605
A_33_P3334384	-6.88942	-2.78438	6.88942	down	0.0642738	-0.0642738	2.78438	2.78438	KDM4A-AS1	KDM4A antisense RNA 1	FALSE	Homo sapiens KDM4A antisense RNA 1 (KDM4A-AS1), long non-coding RNA [NR_033827]	100132774		44168387	chr1	44168328	-	hs|1p34.1	NR_033827	chr1:44168387-44168328	NR_033827	Hs.655569
A_21_P0004038	-7.32863	-2.87354	7.32863	down	-0.240141	-0.223011	2.64197	2.64197			FALSE	DB082734 TESTI4 Homo sapiens cDNA clone TESTI4029157 5', mRNA sequence [DB082734]			99744603	chr5	99744544	+	hs|5q21.1		chr5:99744544-99744603		Hs.582518
A_21_P0004284	-13.3127	-3.73473	13.3127	down	-0.4652	-0.448026	3.27812	3.27812	LOC101927041	uncharacterized LOC101927041	FALSE	PREDICTED: Homo sapiens uncharacterized LOC101927041 (RP11-371M22.1), ncRNA [XR_246559]	101927041		113441459	chr5	113392859	+	hs|5q22.3	XR_246559	chr5:113392859-113441459	XR_246559
A_21_P0012170	-2.0723	-1.05124	2.0723	down	-0.753666	-0.422166	0.463321	0.463321			FALSE	PREDICTED: Homo sapiens uncharacterized LOC101927669 (LOC101927669), ncRNA [XR_244292]			68557	chrUn_gl000215	68498	+		XR_244292	chrUn_gl000215:68498-68557	XR_244292	Hs.580917
A_21_P0010042	-4.32587	-2.11299	4.32587	down	-0.243113	-0.232821	1.87502	1.87502	LOC101929863	uncharacterized LOC101929863	FALSE	PREDICTED: Homo sapiens uncharacterized LOC101929863 (LOC101929863), ncRNA [XR_253974]	101929863		43767198	chr20	43766520	-	hs|20q13.12	XR_253974	chr20:43767198-43766520	XR_253974
A_33_P3296777	-2.72445	-1.44597	2.72445	down	-0.534757	-0.491344	0.932917	0.932917	PSMF1	proteasome (prosome, macropain) inhibitor subunit 1 (PI31)	FALSE	Homo sapiens proteasome (prosome, macropain) inhibitor subunit 1 (PI31) (PSMF1), transcript variant 1, mRNA [NM_006814]	9491	GO:0005515|GO:0006511|GO:0002474|GO:0010467|GO:0004866|GO:0005783|GO:0090263|GO:0044281|GO:0031145|GO:0005829|GO:0034641|GO:0005737|GO:0000082|GO:0016032|GO:0090090|GO:0006977|GO:0000209|GO:0005839|GO:0043066|GO:0006521|GO:0051437|GO:0042590|GO:0006915|GO:0042981|GO:0051436|GO:0051439|GO:0010951|GO:0016020|GO:0070628|GO:0002479|GO:0005654|GO:0000278	1148426	chr20	1148367	+	hs|20p13	NM_006814	chr20:1148367-1148426	NM_006814	Hs.471917
A_21_P0011434	-6.85883	-2.77796	6.85883	down	-0.247835	-0.232058	2.53802	2.53802	RHPN2	rhophilin, Rho GTPase binding protein 2	FALSE	Homo sapiens rhophilin, Rho GTPase binding protein 2 (RHPN2), mRNA [NM_033103]	85415	GO:0007165|GO:0048471|GO:0005737|GO:0005654|GO:0043231	33493793	chr19	33493734	-	hs|19q13.11	NM_033103	chr19:33493793-33493734	NM_033103	Hs.466435
A_33_P3876591	-2.00455	-1.00328	2.00455	down	-1.07926	-1.27275	-0.172729	-0.172729	SNORA76C	small nucleolar RNA, H/ACA box 76C	FALSE	AGENCOURT_13972169 NIH_MGC_173 Homo sapiens cDNA 5', mRNA sequence [CD050382]	677842		62224590	chr17	62224531	+	hs|17q23.3	CD050382	chr17:62224531-62224590		Hs.405444
A_33_P3383169	-17.1039	-4.09625	17.1039	down	-0.238483	-0.225118	3.86445	3.86445			FALSE	Homo sapiens PP13004 mRNA, complete cds. [AF447883]			36125336	chr7	36125277	+	hs|7p14.2	AF447883	chr7:36125277-36125336		Hs.529590
A_33_P3276713	-25.9798	-4.69932	25.9798	down	-0.4957	-0.483211	4.20986	4.20986	HGF	hepatocyte growth factor (hepapoietin A; scatter factor)	FALSE	Homo sapiens hepatocyte growth factor (hepapoietin A; scatter factor) (HGF), transcript variant 2, mRNA [NM_001010931]	3082	GO:0005515|GO:0004252|GO:2000573|GO:0031100|GO:0050731|GO:0001837|GO:0005615|GO:0042802|GO:0000187|GO:0090201|GO:0060665|GO:0070572|GO:0045944|GO:0035729|GO:0006508|GO:0031093|GO:0043154|GO:0031643|GO:0048012|GO:0030335|GO:0046982|GO:0030168|GO:0014068|GO:0005576|GO:0042056|GO:0045766|GO:0050918|GO:0001889|GO:0045669|GO:0007067|GO:0016020|GO:0060326|GO:0007596|GO:0002576|GO:0030212|GO:0051450|GO:…	81374408	chr7	81374349	-	hs|7q21.11	NM_001010931	chr7:81374408-81374349	NM_001010931	Hs.396530
A_33_P3300267	-2.23987	-1.16342	2.23987	down	-1.34639	-1.32139	-0.170473	-0.170473	VIT	vitrin	FALSE	Homo sapiens vitrin (VIT), transcript variant 1, mRNA [NM_053276]	5212	GO:0030198|GO:0010811|GO:0005539|GO:0005614	37041576	chr2	37041517	+	hs|2p22.2	NM_053276	chr2:37041517-37041576	NM_053276	Hs.137415
A_21_P0013624	-9.58281	-3.26045	9.58281	down	-0.237028	-0.221986	3.03094	3.03094			FALSE	1207289A reverse transcriptase related protein. {Homo sapiens} (exp=-1; wgp=-1; cg=-1), partial (15%) [THC2638624]			23898034	chr9	23895597	-	hs|9p21.3		chr9:23898034-23895597
A_23_P137665	-3.07024	-1.61835	3.07024	down	0.301409	-0.234832	1.65164	1.65164	CHI3L1	chitinase 3-like 1 (cartilage glycoprotein-39)	FALSE	Homo sapiens chitinase 3-like 1 (cartilage glycoprotein-39) (CHI3L1), mRNA [NM_001276]	1116	GO:0006032|GO:0051897|GO:0048471|GO:0005783|GO:0030324|GO:0051216|GO:0005615|GO:0006955|GO:0005737|GO:0006954|GO:0071356|GO:0070374|GO:0004568|GO:0070555|GO:0070062|GO:0010800|GO:0007250|GO:0005975|GO:0005578|GO:0006915|GO:0045766|GO:0009612|GO:0008061|GO:0070741|GO:0030246|GO:0034612|GO:0072606|GO:0005201	203148255	chr1	203148196	-	hs|1q32.1	NM_001276	chr1:203148255-203148196	NM_001276	Hs.382202
A_33_P3884005	-6.85336	-2.77681	6.85336	down	0.316076	-0.543246	2.66323	2.66323	LOC93444	uncharacterized LOC93444	FALSE	Homo sapiens cDNA FLJ20168 fis, clone COL09525. [AK000175]	93444		70099293	chr15	70099234	+	hs|15q23	AK000175	chr15:70099234-70099293		Hs.270133
A_21_P0007688	-3.90055	-1.96368	3.90055	down	-0.236302	-0.225005	1.73303	1.73303	LOC100506159	uncharacterized LOC100506159	FALSE	Homo sapiens uncharacterized LOC100506159 (LOC100506159), long non-coding RNA [NR_104634]	100506159		10089275	chr12	10089216	-	hs|12p13.31	NR_104634	chr12:10089275-10089216	NR_104634	Hs.282397
A_21_P0006271	-10.4936	-3.39144	10.4936	down	-0.236398	-0.222342	3.16207	3.16207	LOC101927602	uncharacterized LOC101927602	FALSE	PREDICTED: Homo sapiens uncharacterized LOC101927602 (LOC101927602), ncRNA [XR_246689]	101927602		38964951	chr9	38950465	+	hs|9p13.1	XR_246689	chr9:38950465-38964951	XR_246689
A_32_P194264	-2.26856	-1.18177	2.26856	down	-1.00708	-0.615619	0.370424	0.370424	CHAC2	ChaC, cation transport regulator homolog 2 (E. coli)	FALSE	Homo sapiens ChaC, cation transport regulator homolog 2 (E. coli) (CHAC2), mRNA [NM_001008708]	494143	GO:0008150|GO:0003674|GO:0016746|GO:0008152|GO:0005575	54001513	chr2	54001454	+	hs|2p16.2	NM_001008708	chr2:54001454-54001513	NM_001008708	Hs.585944
A_33_P3304268	-15.3095	-3.93635	15.3095	down	-0.227219	-0.221663	3.71191	3.71191	lnc-PSMG4-2	lnc-PSMG4-2:1	FALSE	Homo sapiens cDNA FLJ39230 fis, clone OCBBF2007485. [AK096549]			3456009	chr6	3455950	+	hs|6p25.2	AK096549	chr6:3455950-3456009		Hs.631820
A_24_P190472	-2.32222	-1.2155	2.32222	down	-0.656001	-0.911317	0.431845	0.431845	SLPI	secretory leukocyte peptidase inhibitor	FALSE	Homo sapiens secretory leukocyte peptidase inhibitor (SLPI), mRNA [NM_003064]	6590	GO:0032091|GO:0031012|GO:0010951|GO:0005515|GO:0004866|GO:0004867|GO:0019899|GO:0070062|GO:0045071	43882279	chr20	43882220	-	hs|20q13.12	NM_003064	chr20:43882279-43882220	NM_003064	Hs.517070
A_33_P3280603	-4.7713	-2.25438	4.7713	down	-0.545281	-0.352905	1.80529	1.80529	PPP4R1L	protein phosphatase 4, regulatory subunit 1-like (pseudogene)	FALSE	Homo sapiens protein phosphatase 4, regulatory subunit 1-like (pseudogene) (PPP4R1L), non-coding RNA [NR_003505]	55370	GO:0008150|GO:0003674|GO:0005575	56821086	chr20	56821027	-	hs|20q13.32	NR_003505	chr20:56821086-56821027	NR_003505	Hs.473179
A_21_P0009653	-2.84542	-1.50864	2.84542	down	-1.30042	-0.848077	0.434389	0.434389	DKFZp434J0226	uncharacterized LOC93429	FALSE	uncharacterized LOC93429 [Source:EntrezGene;Acc:93429] [ENST00000593980]	93429		46715653	chr19	46715594	+	hs|19q13.32		chr19:46715594-46715653
A_21_P0004942	-2.48759	-1.31475	2.48759	down	-0.142469	-0.050684	1.21817	1.21817	LINC01013	long intergenic non-protein coding RNA 1013	FALSE	Homo sapiens long intergenic non-protein coding RNA 1013 (LINC01013), long non-coding RNA [NR_038981]	100507254		132490300	chr6	132490241	+	hs|6q23.2	NR_038981	chr6:132490241-132490300	NR_038981	Hs.103070
A_24_P558365	-6.21747	-2.63633	6.21747	down	-0.158835	-0.220622	2.4466	2.4466	FABP12	fatty acid binding protein 12	FALSE	Homo sapiens fatty acid binding protein 12 (FABP12), mRNA [NM_001105281]	646486	GO:0005215|GO:0006810|GO:0008289	82437344	chr8	82437285	-	hs|8q21.13	NM_001105281	chr8:82437344-82437285	NM_001105281	Hs.586370
A_32_P234145	-14.0308	-3.81052	14.0308	down	-0.217811	-0.213397	3.59492	3.59492	SHC4	SHC (Src homology 2 domain containing) family, member 4	FALSE	Homo sapiens SHC (Src homology 2 domain containing) family, member 4 (SHC4), mRNA [NM_203349]	399694	GO:0005515|GO:0010468|GO:0030971|GO:0008284|GO:0030054|GO:0005886|GO:0019901|GO:0019904|GO:0006915|GO:0035556|GO:0048863|GO:0045211|GO:0007169	49116206	chr15	49116147	-	hs|15q21.1	NM_203349	chr15:49116206-49116147	NM_203349	Hs.642615
A_21_P0010845	-2.41798	-1.2738	2.41798	down	-0.563035	-0.858506	0.563035	0.563035	XLOC_l2_001771		FALSE	BROAD Institute lincRNA (XLOC_l2_001771), lincRNA [TCONS_l2_00003294]			124436537	chr10	124436478	+	hs|10q26.13		chr10:124436478-124436537
A_33_P3409225	-5.03038	-2.33067	5.03038	down	-0.109548	-0.173006	2.18939	2.18939			FALSE	T cell receptor beta variable 5-3 (non-functional) [Source:HGNC Symbol;Acc:HGNC:12220] [ENST00000390362]			142242416	chr7	142242357	-	hs|7q34		chr7:142242416-142242357
A_21_P0012731	-2.75759	-1.46341	2.75759	down	-1.24619	-1.68062	0	0	lnc-BMP2K-1	lnc-BMP2K-1:4	FALSE	Homo sapiens full length insert cDNA clone YY75G10. [AF088011]			80220676	chr4	80220617	+	hs|4q21.21		chr4:80220617-80220676		Hs.732601
A_24_P602871	-3.33612	-1.73817	3.33612	down	-1.5415	-1.84879	0.0430264	0.0430264	SAMD5	sterile alpha motif domain containing 5	FALSE	Homo sapiens sterile alpha motif domain containing 5 (SAMD5), mRNA [NM_001030060]	389432		147890892	chr6	147890833	+	hs|6q24.3	NM_001030060	chr6:147890833-147890892	NM_001030060	Hs.567973
A_21_P0013016	-7.21668	-2.85134	7.21668	down	-0.167014	-0.221033	2.65731	2.65731	XLOC_l2_012415		FALSE	BROAD Institute lincRNA (XLOC_l2_012415), lincRNA [TCONS_l2_00024057]			16163923	chr6	16163864	+	hs|6p22.3		chr6:16163864-16163923
A_33_P3356230	-4.52372	-2.17751	4.52372	down	-0.117901	-0.110515	2.0633	2.0633	CCDC144NL	coiled-coil domain containing 144 family, N-terminal like	FALSE	Homo sapiens coiled-coil domain containing 144 family, N-terminal like (CCDC144NL), mRNA [NM_001004306]	339184		20766856	chr17	20766797	-	hs|17p11.2	NM_001004306	chr17:20766856-20766797	NM_001004306	Hs.674830
A_24_P383076	-2.18245	-1.12595	2.18245	down	-0.400432	-0.400324	0.725569	0.725569	AASDH	aminoadipate-semialdehyde dehydrogenase	FALSE	Homo sapiens aminoadipate-semialdehyde dehydrogenase (AASDH), transcript variant 1, mRNA [NM_181806]	132949	GO:0006631|GO:0016878|GO:0005524	57215519	chr4	57215460	-	hs|4q12	NM_181806	chr4:57215519-57215460	NM_181806	Hs.104347
A_33_P3287892	-14.7912	-3.88667	14.7912	down	-0.116898	-0.110373	3.77303	3.77303	SLTM	SAFB-like, transcription modulator	FALSE	SAFB-like, transcription modulator [Source:HGNC Symbol;Acc:HGNC:20709] [ENST00000480144]	79811	GO:0006355|GO:0000166|GO:0006915|GO:0005654|GO:0006351	59191678	chr15	59191619	-	hs|15q22.1	AK131242	chr15:59191678-59191619		Hs.512932
A_32_P88231	-4.08472	-2.03024	4.08472	down	-0.220842	-0.220857	1.80939	1.80939	ERICH2	glutamate-rich 2	FALSE	Homo sapiens glutamate-rich 2 (ERICH2), transcript variant 3, mRNA [NM_001290031]	285141		171634621	chr2	171634562	+	hs|2q31.1	NM_001290031	chr2:171634562-171634621	NM_001290031	Hs.567958
A_33_P3420224	-10.2447	-3.3568	10.2447	down	-0.890662	-1.452	2.18547	2.18547	ENTPD8	ectonucleoside triphosphate diphosphohydrolase 8	FALSE	Homo sapiens ectonucleoside triphosphate diphosphohydrolase 8 (ENTPD8), transcript variant 1, mRNA [NM_001033113]	377841	GO:0017111|GO:0017110|GO:0005886|GO:0009124|GO:0016021|GO:0009133|GO:0005524|GO:0046872	140328875	chr9	140328816	-	hs|9q34.3	NM_001033113	chr9:140328875-140328816	NM_001033113	Hs.512562
A_21_P0005823	-4.36403	-2.12566	4.36403	down	-2.32594	-1.92538	0	0	lnc-ADAM2-4	lnc-ADAM2-4:1	FALSE	LNCipedia lincRNA (lnc-ADAM2-4), lincRNA [lnc-ADAM2-4:1]			39274781	chr8	39267820	-	hs|8p11.22		chr8:39274781-39267820
A_23_P360804	-4.24062	-2.08428	4.24062	down	0.117036	-0.0674386	2.10908	2.10908	CPNE5	copine V	FALSE	Homo sapiens copine V (CPNE5), mRNA [NM_020939]	57699	GO:0043005|GO:0008150|GO:0003674|GO:0043025|GO:0070062	36708629	chr6	36708570	-	hs|6p21.2	NM_020939	chr6:36708629-36708570	NM_020939	Hs.657869
A_23_P23797	-4.09559	-2.03407	4.09559	down	-0.225497	-0.226076	1.80828	1.80828	ATP6V1G3	ATPase, H+ transporting, lysosomal 13kDa, V1 subunit G3	FALSE	Homo sapiens ATPase, H+ transporting, lysosomal 13kDa, V1 subunit G3 (ATP6V1G3), transcript variant 2, mRNA [NM_133326]	127124	GO:0008286|GO:0006879|GO:0033572|GO:0051701|GO:0008553|GO:0005886|GO:0051117|GO:0090382|GO:0055085|GO:0016471|GO:0005829	198492622	chr1	198492563	-	hs|1q31.3	NM_133326	chr1:198492622-198492563	NM_133326	Hs.127743
A_23_P62298	-8.32003	-3.05659	8.32003	down	-0.176579	-0.179135	2.87873	2.87873	NLGN3	neuroligin 3	FALSE	Homo sapiens neuroligin 3 (NLGN3), transcript variant 2, mRNA [NM_018977]	54413	GO:0052689|GO:0005515|GO:0030054|GO:0048709|GO:2000310|GO:0045202|GO:0030139|GO:0048675|GO:0005615|GO:2000331|GO:0002087|GO:0004872|GO:0030534|GO:0007612|GO:0061001|GO:0060024|GO:0050839|GO:2000969|GO:0007158|GO:0051965|GO:2000463|GO:0009986|GO:0051968|GO:0050804|GO:1900271|GO:0071625|GO:0060076|GO:0007416|GO:0042043|GO:0006898|GO:0097104|GO:0097105|GO:0060080|GO:0050808|GO:0005887|GO:0008542|GO:…	70390484	chrX	70390425	+	hs|Xq13.1	NM_018977	chrX:70390425-70390484	NM_018977	Hs.438877
A_23_P115011	-2.38764	-1.25559	2.38764	down	-0.451293	-0.10181	0.979033	0.979033	ADAMTSL4	ADAMTS-like 4	FALSE	Homo sapiens ADAMTS-like 4 (ADAMTSL4), transcript variant 1, mRNA [NM_019032]	54507	GO:0005515|GO:0043065|GO:0006915|GO:0005575|GO:0002020|GO:0005614|GO:0036066|GO:0006493|GO:0030198|GO:0006508|GO:0005788|GO:0004222|GO:0044267|GO:0043687	150532981	chr1	150532922	+	hs|1q21.3	NM_019032	chr1:150532922-150532981	NM_019032	Hs.516243
A_21_P0003714	-6.8762	-2.78161	6.8762	down	0.269506	-0.376003	2.72836	2.72836	lnc-STX18-2	lnc-STX18-2:1	FALSE	LNCipedia lincRNA (lnc-STX18-2), lincRNA [lnc-STX18-2:1]			4712057	chr4	4711998	-	hs|4p16.2		chr4:4712057-4711998
A_21_P0003403	-3.75742	-1.90974	3.75742	down	-1.42643	-1.03656	0.678252	0.678252			FALSE	BX117354 Soares_NFL_T_GBC_S1 Homo sapiens cDNA clone IMAGp998M104015, mRNA sequence [BX117354]			135345109	chr4	135345050	+	hs|4q28.3		chr4:135345050-135345109		Hs.738318
A_21_P0007551	-19.4828	-4.28413	19.4828	down	-0.365132	-0.363616	3.91976	3.91976	lnc-C12orf68-1	lnc-C12orf68-1:1	FALSE	LNCipedia lincRNA (lnc-C12orf68-1), lincRNA [lnc-C12orf68-1:1]			48619721	chr12	48615810	+	hs|12q13.11		chr12:48615810-48619721
A_21_P0003671	-10.6232	-3.40914	10.6232	down	-0.138409	-0.141162	3.26936	3.26936	lnc-NPY5R-2	lnc-NPY5R-2:2	FALSE	LNCipedia lincRNA (lnc-NPY5R-2), lincRNA [lnc-NPY5R-2:2]			163813536	chr4	163778182	+	hs|4q32.2		chr4:163778182-163813536
A_33_P3292860	-3.69742	-1.88652	3.69742	down	-0.223413	-0.227226	1.6612	1.6612	TMEM191B	transmembrane protein 191B	FALSE	Homo sapiens transmembrane protein 191B (TMEM191B), mRNA [NM_001242313]	728229	GO:0016021	20377758	chr22	20377699	+	hs|22q11.21	NM_001242313	chr22:20377699-20377758	NM_001242313	Hs.376511
A_24_P306892	-8.86177	-3.1476	8.86177	down	-0.18753	-0.186457	2.9606	2.9606	B4GALNT3	beta-1,4-N-acetyl-galactosaminyl transferase 3	FALSE	Homo sapiens beta-1,4-N-acetyl-galactosaminyl transferase 3 (B4GALNT3), mRNA [NM_173593]	283358	GO:0032580|GO:0008152|GO:0016021|GO:0033842|GO:0008376	661675	chr12	661313	+	hs|12p13.33	NM_173593	chr12:661313-661675	NM_173593	Hs.504416
A_33_P3339725	-7.3186	-2.87157	7.3186	down	-0.222109	-0.226995	2.64702	2.64702			FALSE				53763504	chr18	53763445	+	hs|18q21.2		chr18:53763445-53763504
A_23_P257763	-5.463	-2.44969	5.463	down	-0.613816	-1.20177	1.5419	1.5419	BOC	BOC cell adhesion associated, oncogene regulated	FALSE	Homo sapiens BOC cell adhesion associated, oncogene regulated (BOC), transcript variant 2, mRNA [NM_033254]	91653	GO:0042692|GO:0005515|GO:0051149|GO:0005886|GO:0007411|GO:0045663|GO:0043025|GO:0016021|GO:0044295|GO:0007155|GO:0007224	113004257	chr3	113003685	+	hs|3q13.2	NM_033254	chr3:113003685-113004257	NM_033254	Hs.591318
A_19_P00325794	-2.21422	-1.1468	2.21422	down	-1.30212	-0.991476	0	0			FALSE	kinesin family member 28, pseudogene [Source:HGNC Symbol;Acc:HGNC:49205] [ENST00000451123]			246943678	chr1	246943619	-	hs|1q44		chr1:246943678-246943619	XM_001717074
A_19_P00316415	-3.72826	-1.8985	3.72826	down	-0.447101	0.0405393	1.69522	1.69522	lnc-ERP44-3	lnc-ERP44-3:3	FALSE	Homo sapiens cDNA FLJ33647 fis, clone BRAMY2024374. [AK090966]			102563606	chr9	102563547	-	hs|9q22.33		chr9:102563606-102563547		Hs.734674
A_21_P0011972	-21.0639	-4.3967	21.0639	down	-0.112597	-0.115686	4.28256	4.28256	XLOC_l2_008313		FALSE	BROAD Institute lincRNA (XLOC_l2_008313), lincRNA [TCONS_l2_00014951]			154277099	chr2	154277040	-	hs|2q23.3		chr2:154277099-154277040
A_21_P0005352	-12.7409	-3.67139	12.7409	down	-0.220406	-0.220828	3.45077	3.45077	lnc-CHST12-1	lnc-CHST12-1:6	FALSE	LNCipedia lincRNA (lnc-CHST12-1), lincRNA [lnc-CHST12-1:6]			2487873	chr7	2487814	+	hs|7p22.3		chr7:2487814-2487873		Hs.288853
A_33_P3718679	-4.6247	-2.20936	4.6247	down	-0.442799	-0.442768	1.76658	1.76658	LOC283731	uncharacterized LOC283731	FALSE	Homo sapiens hypothetical protein LOC283731, mRNA (cDNA clone IMAGE:4826227). [BC050067]	283731		74418316	chr15	74418257	-	hs|15q24.1	BC050067	chr15:74418316-74418257		Hs.631696
A_21_P0012081	-10.3758	-3.37514	10.3758	down	-0.201301	-0.79756	2.87571	2.87571			FALSE	MIR4435-1 host gene (non-protein coding) [Source:HGNC Symbol;Acc:HGNC:35163] [ENST00000439494]			112227356	chr2	112227297	-	hs|2q13		chr2:112227356-112227297
A_24_P156288	-3.6949	-1.88554	3.6949	down	-0.558354	0.020328	1.61652	1.61652	GZF1	GDNF-inducible zinc finger protein 1	FALSE	Homo sapiens GDNF-inducible zinc finger protein 1 (GZF1), mRNA [NM_022482]	64412	GO:0001658|GO:0005794|GO:0001206|GO:0005730|GO:0005634|GO:0000122|GO:0000978|GO:0046872|GO:0006351|GO:0043565|GO:0001078|GO:0005737|GO:0000980|GO:0005654|GO:0045892	23352486	chr20	23352427	+	hs|20p11.21	NM_022482	chr20:23352427-23352486	NM_022482	Hs.709462
A_33_P3341686	-3.91949	-1.97066	3.91949	down	-0.423613	-0.0972581	1.71023	1.71023	XIST	X inactive specific transcript (non-protein coding)	FALSE	Homo sapiens X inactive specific transcript (non-protein coding) (XIST), long non-coding RNA [NR_001564]	7503		73040565	chrX	73040506	-	hs|Xq13.2	NR_001564	chrX:73040565-73040506	NR_001564	Hs.655450
A_33_P3222183	-16.4927	-4.04375	16.4927	down	-0.109522	-0.110779	3.9336	3.9336	DPYSL5	dihydropyrimidinase-like 5	FALSE	Homo sapiens dihydropyrimidinase-like 5 (DPYSL5), transcript variant 1, mRNA [NM_020134]	56896	GO:0007165|GO:0007411|GO:0016812|GO:0043025|GO:0030425|GO:0007399|GO:0006208|GO:0005829	27170064	chr2	27170005	+	hs|2p23.3	NM_020134	chr2:27170005-27170064	NM_020134	Hs.299315
A_21_P0014139	-10.254	-3.35812	10.254	down	-0.111183	-0.114121	3.24547	3.24547	MTRR	5-methyltetrahydrofolate-homocysteine methyltransferase reductase	FALSE	5-methyltetrahydrofolate-homocysteine methyltransferase reductase [Source:HGNC Symbol;Acc:HGNC:7473] [ENST00000507837]	4552	GO:0050661|GO:0006805|GO:0010181|GO:0050660|GO:0009086|GO:0006767|GO:0044281|GO:0032259|GO:0005829|GO:0034641|GO:0005737|GO:0006555|GO:0046655|GO:0045111|GO:0009235|GO:0005506|GO:0006306|GO:0030586|GO:0000096|GO:0003958|GO:0006766|GO:0016709|GO:0005654|GO:0016723|GO:0055114	7862131	chr5	7862072	+	hs|5p15.31		chr5:7862072-7862131
A_21_P0003606	-8.87283	-3.14939	8.87283	down	-0.139269	-0.142458	3.00853	3.00853			FALSE				43347509	chr4	43347450	+	hs|4p13		chr4:43347450-43347509
A_32_P204989	-4.86073	-2.28117	4.86073	down	-0.224854	-0.233089	2.0522	2.0522			FALSE	Connexin {ECO:0000313			48728098	chr1	48728039	-	hs|1p33	AF251047	chr1:48728098-48728039		Hs.679767
A_23_P42257	-2.00648	-1.00467	2.00648	down	0.145098	0.108022	1.13123	1.13123	IER3	immediate early response 3	FALSE	Homo sapiens immediate early response 3 (IER3), mRNA [NM_003897]	8870	GO:0005515|GO:0007095|GO:0043066|GO:0045732|GO:0008630|GO:2001020|GO:0006915|GO:0005634|GO:0009653|GO:0006282|GO:0050728|GO:0001562|GO:2000377|GO:0016021|GO:0045820|GO:0046822|GO:0003085	30711371	chr6	30711312	-	hs|6p21.33	NM_003897	chr6:30711371-30711312	NM_003897	Hs.76095
A_21_P0002807	-4.84985	-2.27794	4.84985	down	-0.219251	-0.225908	2.05536	2.05536			FALSE	ad45a10.s1 Stratagene lung carcinoma 937218 Homo sapiens cDNA clone IMAGE:884634 3' similar to contains Alu repetitive element;contains element MER22 repetitive element ;, mRNA sequence [AA629885]			173054586	chr3	173054363	+	hs|3q26.31		chr3:173054363-173054586		Hs.581635
A_21_P0002079	-5.8829	-2.55653	5.8829	down	-0.110763	-0.114851	2.44372	2.44372			FALSE				103733358	chr2	103733299	-	hs|2q12.1		chr2:103733358-103733299
A_33_P3418421	-11.8885	-3.5715	11.8885	down	-0.326349	-0.0508456	3.3829	3.3829	SLC3A1	solute carrier family 3 (amino acid transporter heavy chain), member 1	FALSE	Homo sapiens SLC3A1 variant F (SLC3A1) mRNA, complete cds, alternatively spliced. [DQ023516]	6519	GO:0005515|GO:0005774|GO:0006520|GO:0046982|GO:0005886|GO:0043169|GO:0005975|GO:0005743|GO:0006865|GO:0031526|GO:0003824|GO:0055085|GO:0003333|GO:0015802|GO:0016020|GO:0015184|GO:0015171|GO:0005887|GO:0015811|GO:0015174|GO:0070062|GO:0006811	44542051	chr2	44541992	+	hs|2p21	DQ023516	chr2:44541992-44542051		Hs.112916
A_21_P0014221	-2.6261	-1.39292	2.6261	down	-0.21896	-0.257034	1.15492	1.15492	LOC100507464	uncharacterized LOC100507464	FALSE	PREDICTED: Homo sapiens uncharacterized LOC100507464 (LOC100507464), ncRNA [XR_108905]	100507464		50409381	chr8	50409322	-	hs|8q11.21	XR_108905	chr8:50409381-50409322	XR_108905	Hs.245745
A_24_P70183	-3.78758	-1.92128	3.78758	down	-0.110257	-0.119999	1.80615	1.80615	MYH11	myosin, heavy chain 11, smooth muscle	FALSE	Homo sapiens myosin, heavy chain 11, smooth muscle (MYH11), transcript variant SM2B, mRNA [NM_001040113]	4629	GO:0005515|GO:0042470|GO:0005516|GO:0001725|GO:0048013|GO:0005524|GO:0030485|GO:0005829|GO:0006939|GO:0048739|GO:0032982|GO:0003774|GO:0051015|GO:0006936|GO:0007411|GO:0008152|GO:0005859|GO:0008307|GO:0030241|GO:0070062|GO:0048251	15797968	chr16	15797909	-	hs|16p13.11	NM_001040113	chr16:15797968-15797909	NM_001040113	Hs.460109
A_21_P0007378	-7.11982	-2.83184	7.11982	down	-0.109912	-0.115999	2.71889	2.71889	LOC101928944	uncharacterized LOC101928944	FALSE	Homo sapiens uncharacterized LOC101928944 (LOC101928944), long non-coding RNA [NR_120570]	101928944		80473388	chr11	80473329	-	hs|11q14.1	NR_120570	chr11:80473388-80473329	NR_120570	Hs.547927
A_33_P3293187	-19.7824	-4.30614	19.7824	down	-0.21477	-0.224679	4.08642	4.08642	SLC14A2	solute carrier family 14 (urea transporter), member 2	FALSE	Homo sapiens solute carrier family 14 (urea transporter), member 2 (SLC14A2), transcript variant 1, mRNA [NM_007163]	8170	GO:0005515|GO:0016324|GO:0016020|GO:0005886|GO:0015204|GO:0016021|GO:0071918|GO:0055085|GO:0050839|GO:0015840	43212442	chr18	43212383	+	hs|18q12.3	NM_007163	chr18:43212383-43212442	NM_007163	Hs.710927
A_33_P3416181	-39.8907	-5.31798	39.8907	down	-0.214889	-0.224464	5.0983	5.0983			FALSE	DB048201 TESTI2 Homo sapiens cDNA clone TESTI2037187 5', mRNA sequence [DB048201]			88100812	chr14	88100753	-	hs|14q31.3	DB048201	chr14:88100812-88100753		Hs.691123
A_19_P00316166	-5.35183	-2.42003	5.35183	down	-2.55776	-2.8073	-0.262498	-0.262498	LOC101928858	uncharacterized LOC101928858	FALSE	PREDICTED: Homo sapiens uncharacterized LOC101928858 (RP11-434D9.1), transcript variant X2, ncRNA [XR_425858]	101928858		67093294	chr5	67093235	+	hs|5q13.1	XR_425858	chr5:67093235-67093294	XR_425858
A_21_P0007002	-17.988	-4.16896	17.988	down	-0.213714	-0.224511	3.94985	3.94985	lnc-RTKN2-3	lnc-RTKN2-3:1	FALSE	LNCipedia lincRNA (lnc-RTKN2-3), lincRNA [lnc-RTKN2-3:1]			63579889	chr10	63579830	-	hs|10q21.2		chr10:63579889-63579830
A_23_P56578	-2.1763	-1.12188	2.1763	down	-1.52319	-1.58174	-0.430585	-0.430585	VIT	vitrin	FALSE	Homo sapiens vitrin (VIT), transcript variant 1, mRNA [NM_053276]	5212	GO:0030198|GO:0010811|GO:0005539|GO:0005614	37041825	chr2	37041766	+	hs|2p22.2	NM_053276	chr2:37041766-37041825	NM_053276	Hs.137415
A_23_P65100	-5.65047	-2.49837	5.65047	down	-0.211055	-0.224419	2.28063	2.28063	GALNT8	polypeptide N-acetylgalactosaminyltransferase 8	FALSE	Homo sapiens polypeptide N-acetylgalactosaminyltransferase 8 (GALNT8), mRNA [NM_017417]	26290	GO:0004653|GO:0006493|GO:0000139|GO:0030246|GO:0016266|GO:0016021|GO:0044267|GO:0046872|GO:0043687	4881616	chr12	4874659	+	hs|12p13.32	NM_017417	chr12:4874659-4881616	NM_017417	Hs.511985
A_33_P3423330	-3.80103	-1.92639	3.80103	down	-0.261045	-0.275693	1.65802	1.65802	CNTFR-AS1	CNTFR antisense RNA 1	FALSE	Homo sapiens CNTFR antisense RNA 1 (CNTFR-AS1), long non-coding RNA [NR_024369]	415056		34583069	chr9	34583010	+	hs|9p13.3	NR_024369	chr9:34583010-34583069	NR_024369	Hs.734229
A_23_P314101	-2.79001	-1.48027	2.79001	down	-0.0798588	-0.282548	1.29907	1.29907	SUSD2	sushi domain containing 2	FALSE	Homo sapiens sushi domain containing 2 (SUSD2), mRNA [NM_019601]	56241	GO:0005515|GO:0006955|GO:0005886|GO:0030247|GO:0016021|GO:0006898|GO:0070062|GO:0005044	24585037	chr22	24584978	+	hs|22q11.23	NM_019601	chr22:24584978-24585037	NM_019601	Hs.131819
A_33_P3366540	-2.22875	-1.15624	2.22875	down	-0.982845	-1.32963	0	0	CSGALNACT1	chondroitin sulfate N-acetylgalactosaminyltransferase 1	FALSE	Homo sapiens chondroitin sulfate N-acetylgalactosaminyltransferase 1 (CSGALNACT1), transcript variant 1, mRNA [NM_001130518]	55790	GO:0008037|GO:0051216|GO:0008283|GO:0044281|GO:0015014|GO:0009653|GO:0046872|GO:0005622|GO:0030206|GO:0030198|GO:0032580|GO:0030204|GO:0047238|GO:0030203|GO:0047237|GO:0050653|GO:0008955|GO:0050650|GO:0050651|GO:0005975|GO:0019276|GO:0015020|GO:0008376|GO:0007399|GO:0030166|GO:0001958|GO:0030173|GO:0000139|GO:0009405|GO:0046398|GO:0030210	19315997	chr8	19315938	-	hs|8p21.3	NM_001130518	chr8:19315997-19315938	NM_001130518	Hs.613729
A_23_P134851	-4.90244	-2.2935	4.90244	down	-0.307692	-0.323457	1.97792	1.97792	DOK2	docking protein 2, 56kDa	FALSE	Homo sapiens docking protein 2, 56kDa (DOK2), mRNA [NM_003974]	9046	GO:0007165|GO:0007596|GO:0005158|GO:0005068|GO:0007265|GO:0005057|GO:0050900|GO:0007169|GO:0007166|GO:0005829	21767417	chr8	21767358	-	hs|8p21.3	NM_003974	chr8:21767417-21767358	NM_003974	Hs.71215
A_33_P3229869	-22.5662	-4.49609	22.5662	down	-0.183989	0.518018	4.6631	4.6631	LOC100128714	uncharacterized LOC100128714	FALSE	Homo sapiens uncharacterized LOC100128714 (LOC100128714), long non-coding RNA [NR_040082]	100128714		26260795	chr15	26260736	+	hs|15q12	NR_040082	chr15:26260736-26260795	NR_040082	Hs.587854
A_23_P325562	-2.02196	-1.01576	2.02196	down	-0.865781	-1.16573	0	0	SLC1A7	solute carrier family 1 (glutamate transporter), member 7	FALSE	Homo sapiens solute carrier family 1 (glutamate transporter), member 7 (SLC1A7), transcript variant 4, mRNA [NM_006671]	6512	GO:0005886|GO:0005313|GO:0006835|GO:0017153|GO:0016021|GO:0055085|GO:0006811	53552968	chr1	53552909	-	hs|1p32.3	NM_006671	chr1:53552968-53552909	NM_006671	Hs.104637
A_21_P0011305	-2.08474	-1.05987	2.08474	down	-0.781997	-1.15947	0.0891356	0.0891356	lnc-GOLGA8J-3	lnc-GOLGA8J-3:3	FALSE	Homo sapiens, clone IMAGE:5221398, mRNA. [BC043570]			29969614	chr15	29969555	+	hs|15q13.1		chr15:29969555-29969614		Hs.525720
A_23_P8582	-2.44029	-1.28705	2.44029	down	0.0832598	-0.0327885	1.31229	1.31229	FAM126A	family with sequence similarity 126, member A	FALSE	Homo sapiens family with sequence similarity 126, member A (FAM126A), mRNA [NM_032581]	84668	GO:0008150|GO:0007165|GO:0005737|GO:0005886|GO:0004871	22985197	chr7	22985138	-	hs|7p15.3	NM_032581	chr7:22985197-22985138	NM_032581	Hs.85603
A_21_P0009509	-33.7195	-5.07551	33.7195	down	-1.04732	-1.48165	3.81103	3.81103	LOC284240	uncharacterized LOC284240	FALSE	PREDICTED: Homo sapiens uncharacterized LOC284240 (LOC284240), misc_RNA [XR_248506]	284240		77346751	chr18	77346692	+	hs|18q23	XR_248506	chr18:77346692-77346751	XR_248506	Hs.448912
A_33_P3319248	-9.80192	-3.29306	9.80192	down	-0.0980058	-0.154106	3.16701	3.16701	ZNF705G	zinc finger protein 705G	FALSE	Homo sapiens zinc finger protein 705G (ZNF705G), mRNA [NM_001164457]	100131980	GO:0006355|GO:0005634|GO:0003677|GO:0046872|GO:0006351	7216077	chr8	7216018	-	hs|8p23.1	NM_001164457	chr8:7216077-7216018	NM_001164457	Hs.528391
A_33_P3237050	-8.77582	-3.13353	8.77582	down	-0.0849285	-0.662015	2.76006	2.76006	OR4K14	olfactory receptor, family 4, subfamily K, member 14	FALSE	Homo sapiens olfactory receptor, family 4, subfamily K, member 14 (OR4K14), mRNA [NM_001004712]	122740	GO:0050911|GO:0050907|GO:0004984|GO:0007186|GO:0005886|GO:0004930|GO:0016021|GO:0004888	20482479	chr14	20482420	-	hs|14q11.2	NM_001004712	chr14:20482479-20482420	NM_001004712	Hs.626814
A_21_P0009133	-6.4606	-2.69167	6.4606	down	-0.518904	-0.981715	1.94136	1.94136	lnc-CLEC18B-3	lnc-CLEC18B-3:6	FALSE	LNCipedia lincRNA (lnc-CLEC18B-3), lincRNA [lnc-CLEC18B-3:6]			74239708	chr16	74239649	-	hs|16q23.1		chr16:74239708-74239649
A_21_P0008098	-14.3614	-3.84412	14.3614	down	-0.181548	0.191402	3.84905	3.84905	lnc-SLITRK5-11	lnc-SLITRK5-11:2	FALSE	LNCipedia lincRNA (lnc-SLITRK5-11), lincRNA [lnc-SLITRK5-11:2]			85986300	chr13	85986241	+	hs|13q31.1		chr13:85986241-85986300
A_33_P3267799	-3.52191	-1.81636	3.52191	down	-0.329233	-0.608922	1.34728	1.34728	LILRB4	leukocyte immunoglobulin-like receptor, subfamily B (with TM and ITIM domains), member 4	FALSE	Homo sapiens leukocyte immunoglobulin-like receptor, subfamily B (with TM and ITIM domains), member 4 (LILRB4), transcript variant 1, mRNA [NM_001278426]	11006	GO:0005515|GO:0007165|GO:0005886|GO:0045671|GO:0004872|GO:0016021|GO:0003823|GO:0070062|GO:0002376	55179803	chr19	55179744	+	hs|19q13.42	NM_001278426	chr19:55179744-55179803	NM_001278426	Hs.67846
A_24_P373174	-2.27482	-1.18575	2.27482	down	-0.138379	-0.259575	0.986778	0.986778	RAB27A	RAB27A, member RAS oncogene family	FALSE	Homo sapiens RAB27A, member RAS oncogene family (RAB27A), transcript variant 1, mRNA [NM_004580]	5873	GO:0005515|GO:0043316|GO:0009306|GO:0003924|GO:0032400|GO:0006605|GO:0006887|GO:0006886|GO:0005764|GO:0032402|GO:0030425|GO:0006904|GO:0045921|GO:0050766|GO:0016324|GO:0071985|GO:0097278|GO:0019882|GO:0032482|GO:0030141|GO:0070062|GO:0042470|GO:0043320|GO:0005794|GO:0005770|GO:0019904|GO:0032585|GO:0048489|GO:0030318|GO:0005525|GO:0006184|GO:0010628|GO:0031489|GO:0007596|GO:0019003|GO:0044267|GO:…	55496584	chr15	55496525	-	hs|15q21.3	NM_004580	chr15:55496584-55496525	NM_004580	Hs.654978
A_23_P65307	-2.54856	-1.34968	2.54856	down	-0.608801	-0.872958	0.608801	0.608801	SLITRK6	SLIT and NTRK-like family, member 6	FALSE	Homo sapiens SLIT and NTRK-like family, member 6 (SLITRK6), mRNA [NM_032229]	84189	GO:0008344|GO:0009986|GO:0007605|GO:0007409|GO:0007416|GO:0031223|GO:0021562|GO:0060384|GO:0001964|GO:0035264|GO:0060007|GO:0002088|GO:0005887|GO:0090102|GO:0002093|GO:0007601	86368069	chr13	86368010	-	hs|13q31.1	NM_032229	chr13:86368069-86368010	NM_032229	Hs.525105
A_23_P305877	-2.41801	-1.27382	2.41801	down	-1.20501	-1.45022	-0.0537927	-0.0537927	TMEM261	transmembrane protein 261	FALSE	Homo sapiens transmembrane protein 261 (TMEM261), mRNA [NM_033428]	90871	GO:0016021	7797510	chr9	7797451	-	hs|9p24.1	NM_033428	chr9:7797510-7797451	NM_033428	Hs.7517
A_21_P0010900	-19.395	-4.27761	19.395	down	-0.101832	-0.159431	4.14698	4.14698	XLOC_l2_002100		FALSE	BROAD Institute lincRNA (XLOC_l2_002100), lincRNA [TCONS_l2_00003754]			107249330	chr10	107249271	-	hs|10q25.1		chr10:107249330-107249271
A_33_P3407364	-13.1654	-3.71867	13.1654	down	-0.310861	-1.10752	3.00948	3.00948	NXF5	nuclear RNA export factor 5	FALSE	Homo sapiens nuclear RNA export factor 5 (NXF5), transcript variant 1, mRNA [NM_032946]	55998	GO:0005515|GO:0005737|GO:0006406|GO:0000166|GO:0003723|GO:0050658|GO:0007275|GO:0005634	101096050	chrX	101095991	-	hs|Xq22.1	NM_032946	chrX:101096050-101095991	NM_032946	Hs.307077
A_21_P0001872	-27.8845	-4.80139	27.8845	down	-0.103411	-0.123306	4.68803	4.68803	LOC100507073	uncharacterized LOC100507073	FALSE		100507073		66922336	chr2	66917118	+	hs|2p14		chr2:66917118-66922336
A_33_P3406677	-3.84378	-1.94253	3.84378	down	-0.183363	-0.211696	1.745	1.745	ADH7	alcohol dehydrogenase 7 (class IV), mu or sigma polypeptide	FALSE	Homo sapiens alcohol dehydrogenase 7 (class IV), mu or sigma polypeptide (ADH7), transcript variant 2, mRNA [NM_000673]	131	GO:0006805|GO:0010430|GO:0045471|GO:0006069|GO:0006068|GO:0005576|GO:0044281|GO:0019841|GO:0001523|GO:0005829|GO:0004022|GO:0004031|GO:0009617|GO:0035276|GO:1900116|GO:0042573|GO:0004024|GO:0042572|GO:0008270|GO:0004745|GO:0048019|GO:0055114	100341750	chr4	100341691	-	hs|4q23	NM_000673	chr4:100341750-100341691	NM_000673	Hs.389
A_19_P00805523	-3.63872	-1.86343	3.63872	down	-1.52914	-1.49119	0.353268	0.353268	MIR4458HG	MIR4458 host gene (non-protein coding)	FALSE	Homo sapiens MIR4458 host gene (non-protein coding) (MIR4458HG), long non-coding RNA [NR_039989]	100505738		8462960	chr5	8462901	+	hs|5p15.31		chr5:8462901-8462960	NR_039989	Hs.42197
A_33_P3350638	-3.35003	-1.74418	3.35003	down	0.168502	-0.40372	1.62657	1.62657	KIF22	kinesin family member 22	FALSE	kinesin family member 22 [Source:HGNC Symbol;Acc:HGNC:6391] [ENST00000563666]	3835	GO:0008017|GO:0005871|GO:0005874|GO:0005819|GO:0005634|GO:0003777|GO:0003677|GO:0005524|GO:0005829|GO:0019886|GO:0007067|GO:0005737|GO:0006281|GO:0007596|GO:0007062|GO:0000776|GO:0005654|GO:0007080|GO:0016887|GO:0000785|GO:0005925|GO:0007018	29810104	chr16	29810045	+	hs|16p11.2		chr16:29810045-29810104
A_21_P0002876	-3.96184	-1.98617	3.96184	down	-2.4767	-2.07936	-0.291859	-0.291859	lnc-RP11-723O4.6.1-1	lnc-RP11-723O4.6.1-1:1	FALSE	LNCipedia lincRNA (lnc-RP11-723O4.6.1-1), lincRNA [lnc-RP11-723O4.6.1-1:1]			128719910	chr3	128719477	-	hs|3q21.3		chr3:128719910-128719477	XM_005247667
A_24_P315941	-9.75855	-3.28667	9.75855	down	0.23781	0.522181	3.66666	3.66666			FALSE	immunoglobulin heavy variable 3-49 [Source:HGNC Symbol;Acc:HGNC:5607] [ENST00000390625]			107013063	chr14	107013004	-	hs|14q32.33	D83692	chr14:107013063-107013004		Hs.705117
A_33_P3287760	-4.15793	-2.05586	4.15793	down	-0.087554	-0.139806	1.94218	1.94218	RASGEF1A	RasGEF domain family, member 1A	FALSE	Homo sapiens RasGEF domain family, member 1A (RASGEF1A), transcript variant 1, mRNA [NM_001282862]	221002	GO:0005622|GO:0032320|GO:0016477|GO:0007264|GO:0046579|GO:0005088	43691984	chr10	43691925	-	hs|10q11.21	NM_001282862	chr10:43691984-43691925	NM_001282862	Hs.125293
A_21_P0009864	-2.02	-1.01435	2.02	down	-0.951518	-1.10061	-0.0117095	-0.0117095			FALSE				55682184	chr20	55682125	+	hs|20q13.31		chr20:55682125-55682184
A_33_P3235009	-10.4903	-3.39098	10.4903	down	-0.876448	-0.00981092	2.94785	2.94785	WDR20	WD repeat domain 20	FALSE	Homo sapiens WD repeat domain 20 (WDR20), transcript variant 5, mRNA [NM_001242415]	91833		102678919	chr14	102678860	+	hs|14q32.31	NM_001242415	chr14:102678860-102678919	NM_001242415	Hs.36859
A_24_P592012	-5.06215	-2.33975	5.06215	down	-0.173855	-0.20758	2.14903	2.14903	ZBTB46	zinc finger and BTB domain containing 46	FALSE	Homo sapiens zinc finger and BTB domain containing 46 (ZBTB46), mRNA [NM_025224]	140685	GO:0006355|GO:2001200|GO:0045656|GO:0030853|GO:0005634|GO:0003676|GO:0045650|GO:2001199|GO:0046872|GO:0006351	62375280	chr20	62375221	-	hs|20q13.33	NM_025224	chr20:62375280-62375221	NM_025224	Hs.585028
A_23_P151133	-2.88584	-1.52899	2.88584	down	-0.175387	0.175387	1.52899	1.52899	TSPAN9	tetraspanin 9	FALSE	Homo sapiens tetraspanin 9 (TSPAN9), transcript variant 1, mRNA [NM_006675]	10867	GO:0008150|GO:0003674|GO:0005886|GO:0097197|GO:0016021|GO:0005925	3394959	chr12	3394900	+	hs|12p13.32	NM_006675	chr12:3394900-3394959	NM_006675	Hs.504517
A_33_P3287348	-2.37593	-1.24849	2.37593	down	-1.03966	-1.45732	0	0	CHN2	chimerin 2	FALSE	Homo sapiens chimerin 2 (CHN2), transcript variant 4, mRNA [NM_001293070]	1124	GO:0043547|GO:0005515|GO:0051056|GO:0016020|GO:0007264|GO:0005070|GO:0009967|GO:0046872|GO:0005829|GO:0005096	29553837	chr7	29553778	+	hs|7p14.3	NM_001293070	chr7:29553778-29553837	NM_001293070	Hs.654611
A_33_P3233459	-4.39777	-2.13677	4.39777	down	-1.88756	-2.33212	0.0269318	0.0269318	LINC00994	long intergenic non-protein coding RNA 994	FALSE	Homo sapiens long intergenic non-protein coding RNA 994 (LINC00994), long non-coding RNA [NR_033978]	100287879		64064096	chr3	64064037	-	hs|3p14.1	NR_033978	chr3:64064096-64064037	NR_033978	Hs.452789
A_24_P409402	-2.19376	-1.1334	2.19376	down	-1.14991	-0.789673	0.163609	0.163609			FALSE	ribosomal protein L3 pseudogene 6 [Source:HGNC Symbol;Acc:HGNC:36395] [ENST00000474162]			60686671	chr5	60686612	-	hs|5q12.1		chr5:60686671-60686612
A_21_P0001073	-3.66	-1.87184	3.66	down	-0.170806	-0.204273	1.6843	1.6843			FALSE				232321372	chr1	232321313	+	hs|1q42.2		chr1:232321313-232321372
A_21_P0005365	-16.0234	-4.00211	16.0234	down	-0.0858684	-0.135642	3.89136	3.89136			FALSE				27448511	chr7	27448452	+	hs|7p15.2		chr7:27448452-27448511
A_24_P147169	-2.75602	-1.46259	2.75602	down	-1.33173	-1.59344	0	0	PLA2G4F	phospholipase A2, group IVF	FALSE	Homo sapiens phospholipase A2, group IVF (PLA2G4F), transcript variant 1, mRNA [NM_213600]	255189	GO:0036149|GO:0036148|GO:0032587|GO:0044281|GO:0005765|GO:0031982|GO:0046872|GO:0005829|GO:0036150|GO:0071407|GO:0001516|GO:0004622|GO:0047498|GO:0006644|GO:0009395|GO:0071236|GO:0036151|GO:0050482|GO:0046474|GO:0036152	42434356	chr15	42434297	-	hs|15q15.1	NM_213600	chr15:42434356-42434297	NM_213600	Hs.231873
A_23_P169097	-2.82521	-1.49836	2.82521	down	-0.355588	-0.384582	1.12827	1.12827	WISP1	WNT1 inducible signaling pathway protein 1	FALSE	Homo sapiens WNT1 inducible signaling pathway protein 1 (WISP1), transcript variant 2, mRNA [NM_080838]	8840	GO:0007165|GO:0005737|GO:0005178|GO:0060548|GO:0007267|GO:0005578|GO:0016055|GO:0007155|GO:0008201|GO:0005615|GO:0001558|GO:0005520	134239926	chr8	134239867	+	hs|8q24.22	NM_080838	chr8:134239867-134239926	NM_080838	Hs.492974
A_33_P3248222	-13.0419	-3.70508	13.0419	down	-0.546847	-0.598234	3.13254	3.13254			FALSE				65033333	chr7	65033274	-	hs|7q11.21		chr7:065033333-065033274
A_21_P0009456	-16.826	-4.07262	16.826	down	-0.0846863	-0.136168	3.96219	3.96219	lnc-SLC35G4-2	lnc-SLC35G4-2:1	FALSE	LNCipedia lincRNA (lnc-SLC35G4-2), lincRNA [lnc-SLC35G4-2:1]			11491606	chr18	11491434	+	hs|18p11.21		chr18:11491434-11491606
A_33_P3258581	-2.54296	-1.34651	2.54296	down	-0.67788	-0.866841	0.574147	0.574147	PTGES2-AS1	PTGES2 antisense RNA 1 (head to head)	FALSE	Homo sapiens PTGES2 antisense RNA 1 (head to head) (PTGES2-AS1), long non-coding RNA [NR_024425]	389791	GO:0016021	130892873	chr9	130892814	+	hs|9q34.11	NR_024425	chr9:130892814-130892873	NR_024425	Hs.632678
A_33_P3400258	-4.39746	-2.13667	4.39746	down	-0.303211	-0.59409	1.68802	1.68802	ACSM6	acyl-CoA synthetase medium-chain family member 6	FALSE	Homo sapiens acyl-CoA synthetase medium-chain family member 6 (ACSM6), mRNA [NM_207321]	142827	GO:0005739|GO:0006631|GO:0005525|GO:0005524|GO:0047760|GO:0046872	96979727	chr10	96979668	+	hs|10q23.33	NM_207321	chr10:96979668-96979727	NM_207321	Hs.134229
A_23_P84860	-3.3649	-1.75056	3.3649	down	-2.26903	-2.60098	-0.684439	-0.684439	FAM107A	family with sequence similarity 107, member A	FALSE	Homo sapiens family with sequence similarity 107, member A (FAM107A), transcript variant 1, mRNA [NM_007177]	11170	GO:0043005|GO:0003674|GO:0005634|GO:0001558	58550152	chr3	58550093	-	hs|3p14.3	NM_007177	chr3:58550152-58550093	NM_007177	Hs.506357
A_21_P0001261	-4.2617	-2.09143	4.2617	down	-0.0712204	-0.148905	1.98137	1.98137	lnc-UBIAD1-1	lnc-UBIAD1-1:1	FALSE	LNCipedia lincRNA (lnc-UBIAD1-1), lincRNA [lnc-UBIAD1-1:1]			11424481	chr1	11424422	+	hs|1p36.22		chr1:11424422-11424481
A_21_P0005913	-6.01878	-2.58947	6.01878	down	-0.658867	-1.40184	1.55912	1.55912	lnc-ZFAT-5	lnc-ZFAT-5:2	FALSE	LNCipedia lincRNA (lnc-ZFAT-5), lincRNA [lnc-ZFAT-5:2]			137249557	chr8	137249498	-	hs|8q24.23		chr8:137249557-137249498
A_21_P0004898	-7.35533	-2.87879	7.35533	down	-0.0821848	-0.137465	2.76897	2.76897	lnc-CD109-1	lnc-CD109-1:1	FALSE	LNCipedia lincRNA (lnc-CD109-1), lincRNA [lnc-CD109-1:1]			74364584	chr6	74364525	+	hs|6q13		chr6:74364525-74364584
A_32_P108156	-5.89166	-2.55867	5.89166	down	-0.0809469	-0.137841	2.44928	2.44928	MIR155HG	MIR155 host gene (non-protein coding)	FALSE	Homo sapiens MIR155 host gene (non-protein coding) (MIR155HG), long non-coding RNA [NR_001458]	114614		26946409	chr21	26946350	+	hs|21q21.3	NR_001458	chr21:26946350-26946409	NR_001458	Hs.697120
A_24_P128233	-9.30427	-3.21789	9.30427	down	-0.187851	-0.284818	2.98156	2.98156	SCN5A	sodium channel, voltage gated, type V alpha subunit	FALSE	Homo sapiens sodium channel, voltage-gated, type V, alpha subunit (SCN5A), transcript variant 2, mRNA [NM_000335]	6331	GO:0005515|GO:0005516|GO:0086010|GO:0086070|GO:0060307|GO:0060048|GO:0019228|GO:0060371|GO:0086067|GO:0086069|GO:0060373|GO:0060372|GO:0010765|GO:0007411|GO:0086002|GO:0001518|GO:0045760|GO:0086006|GO:0031625|GO:0086004|GO:0086005|GO:0050679|GO:0019901|GO:0003360|GO:0009986|GO:0017134|GO:0030506|GO:0021549|GO:0014894|GO:0044325|GO:0002027|GO:0086012|GO:0019899|GO:0003231|GO:0050998|GO:0051899|GO:…	38663904	chr3	38662417	-	hs|3p22.2	NM_000335	chr3:38663904-38662417	NM_000335	Hs.517898
A_21_P0005654	-3.91272	-1.96817	3.91272	down	-0.0797315	-0.138542	1.85904	1.85904	LOC101929248	uncharacterized LOC101929248	FALSE	PREDICTED: Homo sapiens uncharacterized LOC101929248 (LOC101929248), ncRNA [XR_246645]	101929248		10714576	chr8	10714039	+	hs|8p23.1		chr8:10714039-10714576	XR_246645
A_23_P346969	-9.66497	-3.27276	9.66497	down	-0.885453	-0.884086	2.38799	2.38799	PIK3CB	phosphatidylinositol-4,5-bisphosphate 3-kinase, catalytic subunit beta	FALSE	Homo sapiens phosphatidylinositol-4,5-bisphosphate 3-kinase, catalytic subunit beta (PIK3CB), transcript variant 1, mRNA [NM_006219]	5291	GO:0005515|GO:0008286|GO:0050852|GO:0005886|GO:0043560|GO:0005634|GO:0044281|GO:0050900|GO:0005829|GO:0000187|GO:0006935|GO:0007173|GO:0040016|GO:0016303|GO:2000369|GO:0007156|GO:0048010|GO:0048011|GO:0006661|GO:0036092|GO:0048015|GO:0006914|GO:0006874|GO:0030168|GO:0005524|GO:0014065|GO:0070527|GO:0046854|GO:0007165|GO:0007186|GO:0016477|GO:0046934|GO:0007596|GO:0008543|GO:0045087|GO:0001952|GO:…	138374340	chr3	138374281	-	hs|3q22.3	NM_006219	chr3:138374340-138374281	NM_006219	Hs.239818
A_33_P3403082	-2.79705	-1.4839	2.79705	down	-1.66558	-2.04505	-0.371409	-0.371409	LINC00176	long intergenic non-protein coding RNA 176	FALSE	Homo sapiens long intergenic non-protein coding RNA 176 (LINC00176), transcript variant 1, long non-coding RNA [NR_027686]	284739		62671131	chr20	62671072	+	hs|20q13.33	NR_027686	chr20:62671072-62671131	NR_027686	Hs.97840
A_23_P368154	-3.60459	-1.84983	3.60459	down	0.171624	-0.171624	1.84983	1.84983	PODN	podocan	FALSE	Homo sapiens podocan (PODN), transcript variant 1, mRNA [NM_153703]	127435	GO:0030336|GO:0005737|GO:0008285|GO:0005518|GO:0005578|GO:0005615	53547770	chr1	53547711	+	hs|1p32.3	NM_153703	chr1:53547711-53547770	NM_153703	Hs.586141
A_33_P3351189	-3.53894	-1.82332	3.53894	down	-0.0918212	-0.21194	1.67144	1.67144	LOC100129603	uncharacterized LOC100129603	FALSE	Q16673_HUMAN (Q16673) PMS7 protein (HPMS7 protein) (Fragment), partial (11%) [THC2638383]	100129603		3197966	chr7	3197907	-	hs|7p22.2		chr7:3197966-3197907
A_19_P00318588	-6.06212	-2.59982	6.06212	down	-0.427962	-0.427426	2.17213	2.17213	LOC101929450	uncharacterized LOC101929450	FALSE	Homo sapiens uncharacterized LOC101929450 (LOC101929450), transcript variant 1, long non-coding RNA [NR_125814]	101929450		29648898	chr8	29648839	+	hs|8p12	NR_125814	chr8:29648839-29648898	NR_125814	Hs.512440
A_23_P97457	-2.25	-1.16993	2.25	down	-0.967503	-0.921217	0.225568	0.225568	AIDA	axin interactor, dorsalization associated	FALSE	Homo sapiens axin interactor, dorsalization associated (AIDA), mRNA [NM_022831]	64853	GO:0043496|GO:0005737|GO:0046329|GO:0019904|GO:0009953|GO:0005575|GO:0043508	222842440	chr1	222842381	-	hs|1q41	NM_022831	chr1:222842440-222842381	NM_022831	Hs.534965
A_23_P101829	-5.59363	-2.48378	5.59363	down	0.164251	1.0398	3.08581	3.08581	LPAR2	lysophosphatidic acid receptor 2	FALSE	Homo sapiens lysophosphatidic acid receptor 2 (LPAR2), mRNA [NM_004720]	9170	GO:0005515|GO:0005886|GO:0009986|GO:0004930|GO:0035025|GO:0030139|GO:0007202|GO:0030165|GO:0007204|GO:0008289|GO:0000187|GO:0007186|GO:0005887|GO:0070915	19735330	chr19	19735271	-	hs|19p13.11	NM_004720	chr19:19735330-19735271	NM_004720	Hs.122575
A_21_P0006463	-3.53981	-1.82367	3.53981	down	-1.59919	-2.04816	0	0	LINC01201	long intergenic non-protein coding RNA 1201	FALSE	Homo sapiens long intergenic non-protein coding RNA 1201 (LINC01201), long non-coding RNA [NR_126350]	104266960		130173760	chrX	130173701	-	hs|Xq26.1		chrX:130173760-130173701	NR_126350	Hs.573575
A_23_P327022	-2.78984	-1.48018	2.78984	down	-1.49298	-1.01847	0.224457	0.224457	MDFIC	MyoD family inhibitor domain containing	FALSE	Homo sapiens MyoD family inhibitor domain containing (MDFIC), transcript variant 1, mRNA [NM_199072]	29969	GO:0005515|GO:0005794|GO:0030111|GO:0030332|GO:0005730|GO:0005634|GO:0007257|GO:0030957|GO:0006351|GO:0050434|GO:0005737|GO:0042308|GO:0016032|GO:0005654|GO:0045893|GO:0045892|GO:0008134	114658690	chr7	114658631	+	hs|7q31.2	NM_199072	chr7:114658631-114658690	NM_199072	Hs.741413
A_33_P3339441	-6.34826	-2.66636	6.34826	down	-1.1034	-0.696322	1.7665	1.7665	LINC01346	long intergenic non-protein coding RNA 1346	FALSE	long intergenic non-protein coding RNA 1346 [Source:HGNC Symbol;Acc:HGNC:50563] [ENST00000456897]	728716		4009394	chr1	4009335	+	hs|1p36.32		chr1:4009335-4009394		Hs.668359
